# Supplementary material for: Decline in plankton diversity and carbon flux with reduced sea ice extent along the Western Antarctic Peninsula
Source: Nat Commun. 2021 Aug 16;12:4948. doi: 10.1038/s41467-021-25235-w (PMC8368043; doi:10.1038/s41467-021-25235-w)
Supplement: Supplementary file 5 — Supplementary Data 3 [file 41467_2021_25235_MOESM5_ESM.xlsx]

## Sheet: Supplementary Data 3
ASV ID	Kingdom	Phylum	Class	Order	Family	Genus
18SASV_1	Eukaryota	Cryptomonadales	Cryptomonadales_cl	Cryptomonadales_or	Cryptomonadales_fa	Geminigera
18SASV_2	Eukaryota	Prymnesiophyceae	Prymnesiophyceae_cl	Prymnesiophyceae_or	Prymnesiophyceae_fa	Phaeocystis
18SASV_3	Eukaryota	Ochrophyta	Diatomea	Bacillariophytina	Mediophyceae	Chaetoceros
18SASV_4	Eukaryota	Ochrophyta	Diatomea	Bacillariophytina	Bacillariophyceae	Fragilariopsis
18SASV_5	Eukaryota	Dinoflagellata	Dinophyceae	Gymnodiniphycidae	Gymnodiniphycidae_fa	Gyrodinium
18SASV_6	Eukaryota	Ochrophyta	Diatomea	Bacillariophytina	Bacillariophyceae	Fragilariopsis
18SASV_7	Eukaryota	Dinoflagellata	Dinophyceae	Gymnodiniphycidae	Gymnodiniphycidae_fa	Gyrodinium
18SASV_8	Eukaryota	Cercozoa	Thecofilosea	Cryomonadida	Rhizaspididae	Rhogostoma
18SASV_9	Eukaryota	Ochrophyta	Diatomea	Bacillariophytina	Mediophyceae	Odontella
18SASV_10	Eukaryota	Dinoflagellata	Dinophyceae	NA	NA	NA
18SASV_11	Eukaryota	Dinoflagellata	Dinophyceae	Gymnodiniphycidae	Gymnodinium_clade	NA
18SASV_12	Eukaryota	Picozoa	Picomonadida	Picomonadidae	Picomonadidae_fa	Picomonas
18SASV_13	Eukaryota	Dinoflagellata	Dinophyceae	Gymnodiniphycidae	Gymnodiniphycidae_fa	Gyrodinium
18SASV_14	Eukaryota	Ochrophyta	Diatomea	Coscinodiscophytina	Corethrids	Corethron
18SASV_15	Eukaryota	Dinoflagellata	Dinophyceae	Peridiniphycidae	NA	NA
18SASV_16	Eukaryota	MAST-3	MAST-3B	NA	NA	NA
18SASV_17	Eukaryota	Ochrophyta	Diatomea	Coscinodiscophytina	Rhizosolenids	Proboscia
18SASV_18	Eukaryota	NA	NA	NA	NA	NA
18SASV_19	Eukaryota	NA	NA	NA	NA	NA
18SASV_20	Eukaryota	Chlorophyta_ph	Prasinophytae	NA	NA	NA
18SASV_21	Eukaryota	Ascomycota	Schizosaccharomycetes	Schizosaccharomycetales	Schizosaccharomycetaceae	Schizosaccharomyces
18SASV_22	Eukaryota	Incertae_Sedis_ph	Incertae_Sedis_cl	Incertae_Sedis_or	Incertae_Sedis_fa	Telonema
18SASV_23	Eukaryota	Dinoflagellata	Dinophyceae	Peridiniphycidae	Gonyaulacales	Azadinium
18SASV_24	Eukaryota	Prymnesiophyceae	Prymnesiophyceae_cl	Prymnesiophyceae_or	Prymnesiophyceae_fa	Phaeocystis
18SASV_25	Eukaryota	Picozoa	Picomonadida	Picomonadidae	Picomonadidae_fa	Picomonas
18SASV_26	Eukaryota	Choanoflagellida	Acanthoecida	Stephanoecidae	Stephanoecidae_fa	Marine_Choanoflagellates_1
18SASV_27	Eukaryota	Dinoflagellata	Dinophyceae	Gymnodiniphycidae	Gymnodinium_clade	Gymnodinium
18SASV_28	Eukaryota	Dinoflagellata	Dinophyceae	Peridiniphycidae	NA	NA
18SASV_29	Eukaryota	Incertae_Sedis_ph	Incertae_Sedis_cl	Incertae_Sedis_or	Incertae_Sedis_fa	Telonema
18SASV_30	Eukaryota	Ochrophyta	Diatomea	Bacillariophytina	Mediophyceae	Thalassiosira
18SASV_31	Eukaryota	Dinoflagellata	Dinophyceae	Peridiniphycidae	NA	NA
18SASV_32	Eukaryota	NA	NA	NA	NA	NA
18SASV_33	Eukaryota	Ochrophyta	Diatomea	Bacillariophytina	Bacillariophyceae	Fragilariopsis
18SASV_34	Eukaryota	Ochrophyta	Dictyochophyceae	Pedinellales	NA	NA
18SASV_35	Eukaryota	Dinoflagellata	Dinophyceae	Gymnodiniphycidae	Gymnodiniphycidae_fa	Gyrodinium
18SASV_36	Eukaryota	Ochrophyta	Diatomea	Bacillariophytina	Mediophyceae	Thalassiosira
18SASV_37	Eukaryota	Ochrophyta	Diatomea	Bacillariophytina	Bacillariophyceae	Pseudo-nitzschia
18SASV_38	Eukaryota	Ochrophyta	Diatomea	Bacillariophytina	Bacillariophyceae	Navicula
18SASV_39	Eukaryota	Ochrophyta	Diatomea	Coscinodiscophytina	NA	NA
18SASV_40	Eukaryota	Incertae_Sedis_ph	Incertae_Sedis_cl	Incertae_Sedis_or	Incertae_Sedis_fa	Telonema
18SASV_41	Eukaryota	Ochrophyta	Diatomea	Coscinodiscophytina	Corethrids	Corethron
18SASV_42	Eukaryota	Prymnesiophyceae	Prymnesiales	Prymnesiales_or	Prymnesiales_fa	Chrysochromulina
18SASV_43	Eukaryota	Dinoflagellata	Dinophyceae	Gymnodiniphycidae	NA	NA
18SASV_44	Eukaryota	Ochrophyta	Diatomea	Bacillariophytina	Mediophyceae	NA
18SASV_45	Eukaryota	Dinoflagellata	Dinophyceae	Gymnodiniphycidae	Gymnodiniphycidae_fa	Gyrodinium
18SASV_46	Eukaryota	Dinoflagellata	Dinophyceae	Peridiniphycidae	Gonyaulacales	Azadinium
18SASV_47	Eukaryota	Protalveolata	Syndiniales	Syndiniales_or	Syndiniales_Group_I	NA
18SASV_48	Eukaryota	Dinoflagellata	Dinophyceae	Gymnodiniphycidae	Gymnodinium_clade	Gyrodiniellum
18SASV_49	Eukaryota	Picozoa	Picomonadida	Picomonadidae	Picomonadidae_fa	Picomonas
18SASV_50	Eukaryota	Ochrophyta	Diatomea	Bacillariophytina	Bacillariophyceae	Pseudo-nitzschia
18SASV_51	Eukaryota	Dinoflagellata	Dinophyceae	Gymnodiniphycidae	Gymnodinium_clade	NA
18SASV_52	Eukaryota	Ochrophyta	Diatomea	Bacillariophytina	Mediophyceae	Thalassiosira
18SASV_53	Eukaryota	Ochrophyta	Diatomea	Bacillariophytina	Bacillariophyceae	Asterionellopsis
18SASV_54	Eukaryota	Dinoflagellata	Dinophyceae	Gymnodiniphycidae	Gymnodiniphycidae_fa	Gyrodinium
18SASV_55	Eukaryota	NA	NA	NA	NA	NA
18SASV_56	Eukaryota	Ciliophora	Intramacronucleata	Spirotrichea	Oligotrichia	NA
18SASV_57	Eukaryota	Ochrophyta	Diatomea	Bacillariophytina	Mediophyceae	Chaetoceros
18SASV_58	Eukaryota	Cryptomonadales	NA	NA	NA	NA
18SASV_59	Eukaryota	NA	NA	NA	NA	NA
18SASV_60	Eukaryota	Ochrophyta	Diatomea	Bacillariophytina	Bacillariophyceae	NA
18SASV_61	Eukaryota	Picozoa	Picomonadida	Picomonadidae	Picomonadidae_fa	Picomonas
18SASV_62	Eukaryota	MAST-2	NA	NA	NA	NA
18SASV_63	Eukaryota	Dinoflagellata	Dinophyceae	Peridiniphycidae	Peridiniales	Islandinium
18SASV_64	Eukaryota	NA	NA	NA	NA	NA
18SASV_65	Eukaryota	Ochrophyta	Diatomea	Bacillariophytina	Mediophyceae	Chaetoceros
18SASV_66	Eukaryota	Ochrophyta	Diatomea	Bacillariophytina	Mediophyceae	Porosira
18SASV_67	Eukaryota	Picozoa	Picomonadida	Picomonadidae	Picomonadidae_fa	Picomonas
18SASV_68	Eukaryota	Ciliophora	Intramacronucleata	Spirotrichea	Choreotrichia	NA
18SASV_69	Eukaryota	NA	NA	NA	NA	NA
18SASV_70	Eukaryota	Arthropoda	Maxillopoda	Calanoida	NA	NA
18SASV_71	Eukaryota	Dinoflagellata	Dinophyceae	Peridiniphycidae	Peridiniales	Heterocapsa
18SASV_72	Eukaryota	Ochrophyta	Diatomea	Bacillariophytina	Mediophyceae	Chaetoceros
18SASV_73	Eukaryota	Ochrophyta	Pelagophyceae	Sarcinochrysidales	Sarcinochrysidales_fa	SS1-E01-69
18SASV_74	Eukaryota	Protalveolata	Syndiniales	Syndiniales_or	Syndiniales_fa	Amoebophrya
18SASV_75	Eukaryota	Cryptomonadales	Cryptomonadales_cl	Cryptomonadales_or	Cryptomonadales_fa	Geminigera
18SASV_76	Eukaryota	Chlorophyta_ph	Prasinophytae	NA	NA	NA
18SASV_77	Eukaryota	Ochrophyta	Diatomea	Coscinodiscophytina	Coscinodiscophytina_fa	Actinocyclus
18SASV_78	Eukaryota	Ochrophyta	Diatomea	Bacillariophytina	Mediophyceae	Chaetoceros
18SASV_79	Eukaryota	Ochrophyta	Diatomea	Bacillariophytina	Mediophyceae	Thalassiosira
18SASV_80	Eukaryota	Prymnesiophyceae	Prymnesiophyceae_cl	Prymnesiophyceae_or	Prymnesiophyceae_fa	Phaeocystis
18SASV_81	Eukaryota	Ciliophora	Intramacronucleata	Spirotrichea	Oligotrichia	NA
18SASV_82	Eukaryota	Dinoflagellata	Dinophyceae	NA	NA	NA
18SASV_83	Eukaryota	Chlorophyta_ph	Prasinophytae	NA	NA	NA
18SASV_84	Eukaryota	Ochrophyta	Diatomea	Bacillariophytina	Mediophyceae	Chaetoceros
18SASV_85	Eukaryota	Prymnesiophyceae	Prymnesiales	NA	NA	NA
18SASV_86	Eukaryota	NA	NA	NA	NA	NA
18SASV_87	Eukaryota	Ochrophyta	Diatomea	Bacillariophytina	Mediophyceae	Thalassiosira
18SASV_88	Eukaryota	Ochrophyta	Dictyochophyceae	NA	NA	NA
18SASV_89	Eukaryota	Dinoflagellata	Dinophyceae	Peridiniphycidae	Gonyaulacales	Azadinium
18SASV_90	Eukaryota	Ochrophyta	MOCH-2	NA	NA	NA
18SASV_91	Eukaryota	Dinoflagellata	Dinophyceae	Gymnodiniphycidae	Gymnodiniphycidae_fa	Gyrodinium
18SASV_92	Eukaryota	Cryptomonadales	Cryptomonadales_cl	Cryptomonadales_or	Cryptomonadales_fa	Geminigera
18SASV_93	Eukaryota	Cryptomonadales	Cryptomonadales_cl	Cryptomonadales_or	Cryptomonadales_fa	Geminigera
18SASV_94	Eukaryota	Ochrophyta	Diatomea	Bacillariophytina	Bacillariophyceae	Cylindrotheca
18SASV_95	Eukaryota	Ciliophora	Intramacronucleata	Spirotrichea	Oligotrichia	Strombidium
18SASV_96	Eukaryota	Ochrophyta	Diatomea	Bacillariophytina	Mediophyceae	Chaetoceros
18SASV_97	Eukaryota	Dinoflagellata	Dinophyceae	NA	NA	NA
18SASV_98	Eukaryota	Protalveolata	Syndiniales	Syndiniales_or	Syndiniales_Group_I	NA
18SASV_99	Eukaryota	Incertae_Sedis_ph	Incertae_Sedis_cl	Incertae_Sedis_or	Incertae_Sedis_fa	Telonema
18SASV_100	Eukaryota	MAST-3	MAST-3B	NA	NA	NA
18SASV_101	Eukaryota	Ochrophyta	Diatomea	Bacillariophytina	Mediophyceae	Thalassiosira
18SASV_102	Eukaryota	NA	NA	NA	NA	NA
18SASV_103	Eukaryota	Ciliophora	Intramacronucleata	Spirotrichea	Oligotrichia	NA
18SASV_104	Eukaryota	Picozoa	Picomonadida	Picomonadidae	Picomonadidae_fa	Picomonas
18SASV_105	Eukaryota	Cercozoa	Thecofilosea	Cryomonadida	Rhizaspididae	Rhogostoma
18SASV_106	Eukaryota	Ciliophora	Intramacronucleata	Spirotrichea	Choreotrichia	Rimostrombidium
18SASV_107	Eukaryota	Dinoflagellata	Dinophyceae	Peridiniphycidae	Gonyaulacales	Azadinium
18SASV_108	Eukaryota	Ochrophyta	Dictyochophyceae	Florenciellales	Florenciellales_fa	Pseudochattonella
18SASV_109	Eukaryota	Ochrophyta	Diatomea	Bacillariophytina	Mediophyceae	Eucampia
18SASV_110	Eukaryota	NA	NA	NA	NA	NA
18SASV_111	Eukaryota	Dinoflagellata	Dinophyceae	NA	NA	NA
18SASV_112	Eukaryota	Cryptomonadales	Cryptomonadales_cl	Cryptomonadales_or	Cryptomonadales_fa	Geminigera
18SASV_113	Eukaryota	Ochrophyta	Diatomea	Bacillariophytina	Bacillariophyceae	Navicula
18SASV_114	Eukaryota	Labyrinthulomycetes	NA	NA	NA	NA
18SASV_115	Eukaryota	Prymnesiophyceae	Prymnesiophyceae_cl	Prymnesiophyceae_or	Prymnesiophyceae_fa	Phaeocystis
18SASV_116	Eukaryota	Cryptomonadales	Cryptomonadales_cl	Cryptomonadales_or	Cryptomonadales_fa	Geminigera
18SASV_117	Eukaryota	Cryptomonadales	Cryptomonadales_cl	Cryptomonadales_or	Cryptomonadales_fa	Geminigera
18SASV_118	Eukaryota	Cryptomonadales	Cryptomonadales_cl	Cryptomonadales_or	Cryptomonadales_fa	Geminigera
18SASV_119	Eukaryota	Dinoflagellata	Dinophyceae	NA	NA	NA
18SASV_120	Eukaryota	Ochrophyta	NA	NA	NA	NA
18SASV_121	Eukaryota	Ciliophora	Intramacronucleata	Spirotrichea	Oligotrichia	NA
18SASV_122	Eukaryota	Dinoflagellata	NA	NA	NA	NA
18SASV_123	Eukaryota	Ciliophora	Intramacronucleata	Spirotrichea	Oligotrichia	NA
18SASV_124	Eukaryota	Cryptomonadales	Cryptomonadales_cl	Cryptomonadales_or	Cryptomonadales_fa	Geminigera
18SASV_125	Eukaryota	Ciliophora	Intramacronucleata	Spirotrichea	Choreotrichia	NA
18SASV_126	Eukaryota	NA	NA	NA	NA	NA
18SASV_127	Eukaryota	Ochrophyta	Diatomea	Bacillariophytina	Mediophyceae	Chaetoceros
18SASV_128	Eukaryota	Prymnesiophyceae	Prymnesiales	NA	NA	NA
18SASV_129	Eukaryota	Picozoa	Picomonadida	Picomonadidae	Picomonadidae_fa	Picomonas
18SASV_130	Eukaryota	Dinoflagellata	Dinophyceae	Gymnodiniphycidae	Gymnodiniphycidae_fa	Gyrodinium
18SASV_131	Eukaryota	Ciliophora	Intramacronucleata	Spirotrichea	Choreotrichia	NA
18SASV_132	Eukaryota	Ochrophyta	Diatomea	Bacillariophytina	Bacillariophyceae	Fragilariopsis
18SASV_133	Eukaryota	Dinoflagellata	Dinophyceae	Peridiniphycidae	Peridiniales	Heterocapsa
18SASV_134	Eukaryota	Protalveolata	Syndiniales	Syndiniales_or	Syndiniales_Group_II	NA
18SASV_135	Eukaryota	Ochrophyta	Dictyochophyceae	Dictyochales	Dictyochales_fa	Dictyocha
18SASV_136	Eukaryota	MAST-1	NA	NA	NA	NA
18SASV_137	Eukaryota	Ciliophora	Intramacronucleata	Spirotrichea	Choreotrichia	Codonellopsis
18SASV_138	Eukaryota	Incertae_Sedis_ph	Incertae_Sedis_cl	Incertae_Sedis_or	Incertae_Sedis_fa	Telonema
18SASV_139	Eukaryota	Dinoflagellata	Dinophyceae	Gymnodiniphycidae	Gymnodiniphycidae_fa	Gyrodinium
18SASV_140	Eukaryota	Ochrophyta	Diatomea	Bacillariophytina	Mediophyceae	Chaetoceros
18SASV_141	Eukaryota	Cercozoa	NA	NA	NA	NA
18SASV_142	Eukaryota	MAST-3	MAST-3B	NA	NA	NA
18SASV_143	Eukaryota	Chlorophyta_ph	Mamiellophyceae	Mamiellales	Mamiellales_fa	Micromonas
18SASV_144	Eukaryota	Ochrophyta	Diatomea	Bacillariophytina	Mediophyceae	NA
18SASV_145	Eukaryota	Chlorophyta_ph	Prasinophytae	NA	NA	NA
18SASV_146	Eukaryota	Protalveolata	Syndiniales	Syndiniales_or	Syndiniales_Group_II	NA
18SASV_147	Eukaryota	Dinoflagellata	NA	NA	NA	NA
18SASV_148	Eukaryota	Prymnesiophyceae	Prymnesiales	Prymnesiales_or	Prymnesiales_fa	Chrysochromulina
18SASV_149	Eukaryota	Protalveolata	Syndiniales	Syndiniales_or	Syndiniales_Group_III	NA
18SASV_150	Eukaryota	Ochrophyta	NA	NA	NA	NA
18SASV_151	Eukaryota	Dinoflagellata	Dinophyceae	Peridiniphycidae	NA	NA
18SASV_152	Eukaryota	NA	NA	NA	NA	NA
18SASV_153	Eukaryota	Ochrophyta	Diatomea	Bacillariophytina	Bacillariophyceae	Entomoneis
18SASV_154	Eukaryota	Cryptomonadales	Cryptomonadales_cl	Cryptomonadales_or	Cryptomonadales_fa	Geminigera
18SASV_155	Eukaryota	Ochrophyta	Diatomea	Bacillariophytina	Bacillariophyceae	Fragilariopsis
18SASV_156	Eukaryota	Cryptomonadales	Cryptomonadales_cl	Cryptomonadales_or	Cryptomonadales_fa	Geminigera
18SASV_157	Eukaryota	Dinoflagellata	Dinophyceae	Peridiniphycidae	Gonyaulacales	Azadinium
18SASV_158	Eukaryota	Dinoflagellata	Dinophyceae	Gymnodiniphycidae	Gymnodiniphycidae_fa	Gyrodinium
18SASV_159	Eukaryota	Protalveolata	Syndiniales	Syndiniales_or	Syndiniales_fa	Amoebophrya
18SASV_160	Eukaryota	Ciliophora	Intramacronucleata	Spirotrichea	Oligotrichia	NA
18SASV_161	Eukaryota	Ochrophyta	Diatomea	Bacillariophytina	Bacillariophyceae	NA
18SASV_162	Eukaryota	Cercozoa	NA	NA	NA	NA
18SASV_163	Eukaryota	Dinoflagellata	Dinophyceae	Gymnodiniphycidae	Gymnodinium_clade	NA
18SASV_164	Eukaryota	Arthropoda	Maxillopoda	Cyclopoida	NA	NA
18SASV_165	Eukaryota	Arthropoda	Maxillopoda	Calanoida	NA	NA
18SASV_166	Eukaryota	Dinoflagellata	Dinophyceae	Peridiniphycidae	Gonyaulacales	Azadinium
18SASV_167	Eukaryota	Arthropoda	Maxillopoda	Calanoida	NA	NA
18SASV_168	Eukaryota	Ochrophyta	Pelagophyceae	Sarcinochrysidales	Sarcinochrysidales_fa	SS1-E01-69
18SASV_169	Eukaryota	Ochrophyta	Diatomea	Coscinodiscophytina	Coscinodiscophytina_fa	Actinocyclus
18SASV_170	Eukaryota	MAST-3	MAST-3L	NA	NA	NA
18SASV_171	Eukaryota	Choanoflagellida	Acanthoecida	Stephanoecidae	Stephanoecidae_fa	Diaphanoeca
18SASV_172	Eukaryota	Dinoflagellata	Dinophyceae	Gymnodiniphycidae	Gymnodiniphycidae_fa	Gyrodinium
18SASV_173	Eukaryota	Dinoflagellata	Dinophyceae	Peridiniphycidae	NA	NA
18SASV_174	Eukaryota	Ochrophyta	Diatomea	Bacillariophytina	Bacillariophyceae	Pseudo-nitzschia
18SASV_175	Eukaryota	Ciliophora	Intramacronucleata	Spirotrichea	Choreotrichia	Amphorellopsis
18SASV_176	Eukaryota	Dinoflagellata	Dinophyceae	Gymnodiniphycidae	NA	NA
18SASV_177	Eukaryota	Choanoflagellida	Acanthoecida	Stephanoecidae	NA	NA
18SASV_178	Eukaryota	Dinoflagellata	Dinophyceae	Peridiniphycidae	Thoracosphaeraceae	Scrippsiella
18SASV_179	Eukaryota	NA	NA	NA	NA	NA
18SASV_180	Eukaryota	Dinoflagellata	Dinophyceae	NA	NA	NA
18SASV_181	Eukaryota	MAST-3	MAST-3E	NA	NA	NA
18SASV_182	Eukaryota	Protalveolata	Syndiniales	Syndiniales_or	Syndiniales_Group_II	NA
18SASV_183	Eukaryota	Cryptomonadales	Cryptomonadales_cl	Cryptomonadales_or	Cryptomonadales_fa	Geminigera
18SASV_184	Eukaryota	Ochrophyta	Diatomea	Bacillariophytina	Mediophyceae	Thalassiosira
18SASV_185	Eukaryota	Ciliophora	Intramacronucleata	Spirotrichea	Oligotrichia	NA
18SASV_186	Eukaryota	Cryptomonadales	Cryptomonadales_cl	Cryptomonadales_or	Cryptomonadales_fa	Geminigera
18SASV_187	Eukaryota	Cryptomonadales	Cryptomonadales_cl	Cryptomonadales_or	Cryptomonadales_fa	Geminigera
18SASV_188	Eukaryota	Ochrophyta	Pelagophyceae	Sarcinochrysidales	Sarcinochrysidales_fa	SS1-E01-69
18SASV_189	Eukaryota	Cryptomonadales	Cryptomonadales_cl	Cryptomonadales_or	Cryptomonadales_fa	Geminigera
18SASV_190	Eukaryota	Ochrophyta	Diatomea	Bacillariophytina	Mediophyceae	Thalassiosira
18SASV_191	Eukaryota	Cercozoa	Thecofilosea	Cryomonadida	Rhizaspididae	Rhogostoma
18SASV_192	Eukaryota	MAST-3	MAST-3E	NA	NA	NA
18SASV_193	Eukaryota	Protalveolata	Syndiniales	Syndiniales_or	Syndiniales_fa	Amoebophrya
18SASV_194	Eukaryota	Ciliophora	Intramacronucleata	Spirotrichea	Choreotrichia	Pelagostrobilidium
18SASV_195	Eukaryota	Cryptomonadales	Cryptomonadales_cl	Cryptomonadales_or	Cryptomonadales_fa	Geminigera
18SASV_196	Eukaryota	Dinoflagellata	Dinophyceae	Gymnodiniphycidae	Gymnodiniphycidae_fa	Gyrodinium
18SASV_197	Eukaryota	Incertae_Sedis	NA	NA	NA	NA
18SASV_198	Eukaryota	Ochrophyta	Pelagophyceae	Sarcinochrysidales	Sarcinochrysidales_fa	SS1-E01-69
18SASV_199	Eukaryota	Dinoflagellata	Dinophyceae	Peridiniphycidae	NA	NA
18SASV_200	Eukaryota	Dinoflagellata	Dinophyceae	NA	NA	NA
18SASV_201	Eukaryota	Protalveolata	Syndiniales	Syndiniales_or	Syndiniales_Group_II	NA
18SASV_202	Eukaryota	Cercozoa	Thecofilosea	Cryomonadida	Rhizaspididae	Rhogostoma
18SASV_203	Eukaryota	Arthropoda	Malacostraca	NA	NA	NA
18SASV_204	Eukaryota	Incertae_Sedis_ph	Incertae_Sedis_cl	Incertae_Sedis_or	Incertae_Sedis_fa	Telonema
18SASV_205	Eukaryota	Ochrophyta	Diatomea	Coscinodiscophytina	NA	NA
18SASV_206	Eukaryota	Ochrophyta	Diatomea	Bacillariophytina	Bacillariophyceae	Fragilariopsis
18SASV_207	Eukaryota	Dinoflagellata	Dinophyceae	Peridiniphycidae	Gonyaulacales	Azadinium
18SASV_208	Eukaryota	Dinoflagellata	Dinophyceae	Gymnodiniphycidae	Gymnodiniphycidae_fa	Gyrodinium
18SASV_209	Eukaryota	Prymnesiophyceae	Prymnesiophyceae_cl	Prymnesiophyceae_or	Prymnesiophyceae_fa	Phaeocystis
18SASV_210	Eukaryota	Ochrophyta	Ochrophyta_cl	Ochrophyta_or	Ochrophyta_fa	Bolidomonas
18SASV_211	Eukaryota	Ochrophyta	Diatomea	Bacillariophytina	Mediophyceae	Odontella
18SASV_212	Eukaryota	Arthropoda	Maxillopoda	Harpacticoida	NA	NA
18SASV_213	Eukaryota	Cryptomonadales	Cryptomonadales_cl	Cryptomonadales_or	Cryptomonadales_fa	Geminigera
18SASV_214	Eukaryota	Cryptomonadales	Cryptomonadales_cl	Cryptomonadales_or	Cryptomonadales_fa	Geminigera
18SASV_215	Eukaryota	Prymnesiophyceae	Prymnesiales	Prymnesiales_or	Prymnesiales_fa	NA
18SASV_216	Eukaryota	Picozoa	Picomonadida	Picomonadidae	Picomonadidae_fa	Picomonas
18SASV_217	Eukaryota	Protalveolata	Syndiniales	Syndiniales_or	Syndiniales_Group_I	NA
18SASV_218	Eukaryota	Cryptomonadales	Cryptomonadales_cl	Cryptomonadales_or	Cryptomonadales_fa	Geminigera
18SASV_219	Eukaryota	Dinoflagellata	Incertae_Sedis	Incertae_Sedis_or	Incertae_Sedis_fa	Haplozoon
18SASV_220	Eukaryota	NA	NA	NA	NA	NA
18SASV_221	Eukaryota	Cryptomonadales	Cryptomonadales_cl	Cryptomonadales_or	Cryptomonadales_fa	Geminigera
18SASV_222	Eukaryota	Ochrophyta	Diatomea	Bacillariophytina	Mediophyceae	Chaetoceros
18SASV_223	Eukaryota	Protalveolata	Syndiniales	Syndiniales_or	Syndiniales_Group_II	NA
18SASV_224	Eukaryota	Prymnesiophyceae	Prymnesiales	Prymnesiales_or	Prymnesiales_fa	Chrysochromulina
18SASV_225	Eukaryota	Ciliophora	Intramacronucleata	Spirotrichea	Choreotrichia	NA
18SASV_226	Eukaryota	Dinoflagellata	Dinophyceae	NA	NA	NA
18SASV_227	Eukaryota	Dinoflagellata	Dinophyceae	NA	NA	NA
18SASV_228	Eukaryota	Dinoflagellata	Dinophyceae	Gymnodiniphycidae	Gymnodiniphycidae_fa	Gyrodinium
18SASV_229	Eukaryota	Ctenophora	Tentaculata	Cydippida	NA	NA
18SASV_230	Eukaryota	Cryptomonadales	Cryptomonadales_cl	Cryptomonadales_or	Cryptomonadales_fa	Geminigera
18SASV_231	Eukaryota	Chlorophyta_ph	Prasinophytae	NA	NA	NA
18SASV_232	Eukaryota	Cryptomonadales	Cryptomonadales_cl	Cryptomonadales_or	Cryptomonadales_fa	Geminigera
18SASV_233	Eukaryota	Cercozoa	Thecofilosea	Cryomonadida	Rhizaspididae	Rhogostoma
18SASV_234	Eukaryota	Cercozoa	NA	NA	NA	NA
18SASV_235	Eukaryota	Cryptomonadales	Cryptomonadales_cl	Cryptomonadales_or	Cryptomonadales_fa	Geminigera
18SASV_236	Eukaryota	Ochrophyta	Diatomea	Bacillariophytina	Bacillariophyceae	Fragilariopsis
18SASV_237	Eukaryota	Ochrophyta	Diatomea	Coscinodiscophytina	Fragilariales	Thalassionema
18SASV_238	Eukaryota	Ciliophora	Intramacronucleata	Spirotrichea	Oligotrichia	Pseudotontonia
18SASV_239	Eukaryota	Dinoflagellata	Dinophyceae	Gymnodiniphycidae	Gymnodiniphycidae_fa	Gyrodinium
18SASV_240	Eukaryota	NA	NA	NA	NA	NA
18SASV_241	Eukaryota	Ciliophora	Intramacronucleata	Spirotrichea	Choreotrichia	NA
18SASV_242	Eukaryota	Ochrophyta	Diatomea	Bacillariophytina	Mediophyceae	Thalassiosira
18SASV_243	Eukaryota	Prymnesiophyceae	Prymnesiophyceae_cl	Prymnesiophyceae_or	Prymnesiophyceae_fa	Phaeocystis
18SASV_244	Eukaryota	Ochrophyta	Diatomea	Bacillariophytina	Mediophyceae	Chaetoceros
18SASV_245	Eukaryota	Ochrophyta	Pelagophyceae	Sarcinochrysidales	Sarcinochrysidales_fa	SS1-E01-69
18SASV_246	Eukaryota	Dinoflagellata	Dinophyceae	NA	NA	NA
18SASV_247	Eukaryota	Prymnesiophyceae	Prymnesiophyceae_cl	Prymnesiophyceae_or	Prymnesiophyceae_fa	Phaeocystis
18SASV_248	Eukaryota	Protalveolata	Syndiniales	Syndiniales_or	Syndiniales_Group_I	NA
18SASV_249	Eukaryota	Ochrophyta	Pelagophyceae	Sarcinochrysidales	Sarcinochrysidales_fa	SS1-E01-69
18SASV_250	Eukaryota	Cercozoa	Thecofilosea	Cryomonadida	Rhizaspididae	Rhogostoma
18SASV_251	Eukaryota	Ciliophora	Intramacronucleata	Conthreep	Phyllopharyngea	Pithites
18SASV_252	Eukaryota	Ochrophyta	Ochrophyta_cl	Ochrophyta_or	Ochrophyta_fa	Bolidomonas
18SASV_253	Eukaryota	NA	NA	NA	NA	NA
18SASV_254	Eukaryota	Prymnesiophyceae	Prymnesiales	Prymnesiales_or	Prymnesiales_fa	Chrysochromulina
18SASV_255	Eukaryota	Cryptomonadales	NA	NA	NA	NA
18SASV_256	Eukaryota	Ochrophyta	Chrysophyceae	Ochromonadales	Ochromonadales_fa	Paraphysomonas
18SASV_257	Eukaryota	Ciliophora	Intramacronucleata	Conthreep	Phyllopharyngea	Pithites
18SASV_258	Eukaryota	Ciliophora	Intramacronucleata	Spirotrichea	Oligotrichia	Strombidium
18SASV_259	Eukaryota	Incertae_Sedis_ph	Incertae_Sedis_cl	Incertae_Sedis_or	Incertae_Sedis_fa	Telonema
18SASV_260	Eukaryota	Ochrophyta	Diatomea	Bacillariophytina	Mediophyceae	Chaetoceros
18SASV_261	Eukaryota	Dinoflagellata	Dinophyceae	Gymnodiniphycidae	Gymnodiniphycidae_fa	Gyrodinium
18SASV_262	Eukaryota	Dinoflagellata	Dinophyceae	Gymnodiniphycidae	Gymnodiniphycidae_fa	Gyrodinium
18SASV_263	Eukaryota	Protalveolata	Syndiniales	Syndiniales_or	Syndiniales_Group_I	NA
18SASV_264	Eukaryota	Cryptomonadales	Cryptomonadales_cl	Cryptomonadales_or	Cryptomonadales_fa	Geminigera
18SASV_265	Eukaryota	Dinoflagellata	Dinophyceae	Gymnodiniphycidae	Gymnodiniphycidae_fa	Gyrodinium
18SASV_266	Eukaryota	Ciliophora	Intramacronucleata	Spirotrichea	Oligotrichia	NA
18SASV_267	Eukaryota	Ciliophora	Intramacronucleata	Spirotrichea	Oligotrichia	Strombidium
18SASV_268	Eukaryota	Ochrophyta	Diatomea	Bacillariophytina	Mediophyceae	Chaetoceros
18SASV_269	Eukaryota	Chlorophyta_ph	Mamiellophyceae	Mamiellophyceae_or	Mamiellophyceae_fa	Dolichomastix
18SASV_270	Eukaryota	Ochrophyta	Diatomea	Bacillariophytina	NA	NA
18SASV_271	Eukaryota	Protalveolata	Syndiniales	Syndiniales_or	Syndiniales_fa	Amoebophrya
18SASV_272	Eukaryota	Ochrophyta	Diatomea	Bacillariophytina	Bacillariophyceae	Pseudo-nitzschia
18SASV_273	Eukaryota	Chlorophyta_ph	Mamiellophyceae	Mamiellales	Mamiellales_fa	NA
18SASV_274	Eukaryota	Choanoflagellida	Acanthoecida	Stephanoecidae	Stephanoecidae_fa	Diaphanoeca
18SASV_275	Eukaryota	Protalveolata	Syndiniales	Syndiniales_or	Syndiniales_Group_I	NA
18SASV_276	Eukaryota	Ochrophyta	Diatomea	Coscinodiscophytina	Corethrids	Corethron
18SASV_277	Eukaryota	Cryptomonadales	Cryptomonadales_cl	Cryptomonadales_or	Cryptomonadales_fa	Geminigera
18SASV_278	Eukaryota	Dinoflagellata	Dinophyceae	Gymnodiniphycidae	Gymnodinium_clade	NA
18SASV_279	Eukaryota	Ochrophyta	Diatomea	Bacillariophytina	Mediophyceae	Chaetoceros
18SASV_280	Eukaryota	Ochrophyta	Diatomea	Bacillariophytina	Mediophyceae	Chaetoceros
18SASV_281	Eukaryota	Arthropoda	Maxillopoda	Cyclopoida	NA	NA
18SASV_282	Eukaryota	Dinoflagellata	NA	NA	NA	NA
18SASV_283	Eukaryota	Protalveolata	NA	NA	NA	NA
18SASV_284	Eukaryota	Dinoflagellata	Dinophyceae	Gymnodiniphycidae	Gymnodiniphycidae_fa	Gyrodinium
18SASV_285	Eukaryota	Protalveolata	Syndiniales	Syndiniales_or	Syndiniales_Group_II	NA
18SASV_286	Eukaryota	Ochrophyta	Diatomea	Bacillariophytina	Mediophyceae	Thalassiosira
18SASV_287	Eukaryota	Chlorophyta_ph	Mamiellophyceae	Mamiellales	Mamiellales_fa	NA
18SASV_288	Eukaryota	Ochrophyta	Diatomea	Bacillariophytina	Bacillariophyceae	Fragilariopsis
18SASV_289	Eukaryota	Ochrophyta	Chrysophyceae	Chrysocapsales	Chrysocapsales_fa	Hydrurus
18SASV_290	Eukaryota	Incertae_Sedis	NA	NA	NA	NA
18SASV_291	Eukaryota	Ochrophyta	Diatomea	Bacillariophytina	Mediophyceae	Chaetoceros
18SASV_292	Eukaryota	Cryptomonadales	Cryptomonadales_cl	Cryptomonadales_or	Cryptomonadales_fa	Geminigera
18SASV_293	Eukaryota	MAST-3	MAST-3E	NA	NA	NA
18SASV_294	Eukaryota	Ochrophyta	Diatomea	Coscinodiscophytina	Coscinodiscophytina_fa	Coscinodiscus
18SASV_295	Eukaryota	Protalveolata	Syndiniales	Syndiniales_or	Syndiniales_fa	Amoebophrya
18SASV_296	Eukaryota	Ochrophyta	Dictyochophyceae	Florenciellales	Florenciellales_fa	Pseudochattonella
18SASV_297	Eukaryota	Ciliophora	Intramacronucleata	Spirotrichea	Choreotrichia	Codonellopsis
18SASV_298	Eukaryota	Ochrophyta	Diatomea	Bacillariophytina	Bacillariophyceae	Fragilariopsis
18SASV_299	Eukaryota	Ochrophyta	Diatomea	Bacillariophytina	Bacillariophyceae	Pseudo-nitzschia
18SASV_300	Eukaryota	Cercozoa	Granofilosea	Granofilosea_or	Granofilosea_fa	Massisteria
18SASV_301	Eukaryota	Dinoflagellata	Dinophyceae	Gymnodiniphycidae	Gymnodiniphycidae_fa	Gyrodinium
18SASV_302	Eukaryota	Chlorophyta_ph	Mamiellophyceae	Mamiellophyceae_or	Mamiellophyceae_fa	Dolichomastix
18SASV_303	Eukaryota	Dinoflagellata	Dinophyceae	NA	NA	NA
18SASV_304	Eukaryota	Dinoflagellata	Dinophyceae	Gymnodiniphycidae	Gymnodinium_clade	NA
18SASV_305	Eukaryota	Dinoflagellata	Dinophyceae	Gymnodiniphycidae	Gymnodiniphycidae_fa	Gyrodinium
18SASV_306	Eukaryota	Dinoflagellata	Dinophyceae	Peridiniphycidae	NA	NA
18SASV_307	Eukaryota	Chlorophyta_ph	Mamiellophyceae	Mamiellales	Mamiellales_fa	NA
18SASV_308	Eukaryota	Dinoflagellata	Dinophyceae	NA	NA	NA
18SASV_309	Eukaryota	Choanoflagellida	Acanthoecida	Stephanoecidae	Stephanoecidae_fa	NA
18SASV_310	Eukaryota	Prymnesiophyceae	Prymnesiophyceae_cl	Prymnesiophyceae_or	Prymnesiophyceae_fa	Phaeocystis
18SASV_311	Eukaryota	Ochrophyta	Diatomea	Bacillariophytina	Mediophyceae	Chaetoceros
18SASV_312	Eukaryota	Cercozoa	NA	NA	NA	NA
18SASV_313	Eukaryota	Dinoflagellata	Dinophyceae	Gymnodiniphycidae	Gymnodiniphycidae_fa	Gyrodinium
18SASV_314	Eukaryota	NA	NA	NA	NA	NA
18SASV_315	Eukaryota	Chlorophyta_ph	Prasinophytae	Pyramimonadales	Pyramimonadales_fa	Pterosperma
18SASV_316	Eukaryota	Ochrophyta	Chrysophyceae	Ochromonadales	Ochromonadales_fa	Paraphysomonas
18SASV_317	Eukaryota	Protalveolata	Syndiniales	Syndiniales_or	Syndiniales_fa	Amoebophrya
18SASV_318	Eukaryota	Protalveolata	Syndiniales	Syndiniales_or	Syndiniales_Group_I	NA
18SASV_319	Eukaryota	Ochrophyta	Diatomea	Bacillariophytina	Bacillariophyceae	Pseudo-nitzschia
18SASV_320	Eukaryota	Cercozoa	Thecofilosea	Cryomonadida	Rhizaspididae	Rhogostoma
18SASV_321	Eukaryota	Ochrophyta	Diatomea	Coscinodiscophytina	Rhizosolenids	Guinardia
18SASV_322	Eukaryota	Cercozoa	Thecofilosea	Cryomonadida	Rhizaspididae	Rhogostoma
18SASV_323	Eukaryota	Prymnesiophyceae	Prymnesiales	Prymnesiales_or	Prymnesiales_fa	Chrysochromulina
18SASV_324	Eukaryota	Cnidaria	Hydrozoa	Siphonophorae	NA	NA
18SASV_325	Eukaryota	Prymnesiophyceae	Prymnesiales	NA	NA	NA
18SASV_326	Eukaryota	Cercozoa	NA	NA	NA	NA
18SASV_327	Eukaryota	Cercozoa	NA	NA	NA	NA
18SASV_328	Eukaryota	Prymnesiophyceae	Prymnesiophyceae_cl	Prymnesiophyceae_or	Prymnesiophyceae_fa	Phaeocystis
18SASV_329	Eukaryota	Protalveolata	Syndiniales	Syndiniales_or	Syndiniales_fa	Amoebophrya
18SASV_330	Eukaryota	Ochrophyta	Diatomea	Bacillariophytina	Mediophyceae	Chaetoceros
18SASV_331	Eukaryota	Ochrophyta	Diatomea	Bacillariophytina	Bacillariophyceae	Fragilariopsis
18SASV_332	Eukaryota	Dinoflagellata	Dinophyceae	Gymnodiniphycidae	Gymnodinium_clade	Chytriodinium
18SASV_333	Eukaryota	Prymnesiophyceae	Prymnesiophyceae_cl	Prymnesiophyceae_or	Prymnesiophyceae_fa	Phaeocystis
18SASV_334	Eukaryota	Cercozoa	Thecofilosea	Cryomonadida	Rhizaspididae	Rhogostoma
18SASV_335	Eukaryota	Ciliophora	Intramacronucleata	Spirotrichea	Choreotrichia	Pelagostrobilidium
18SASV_336	Eukaryota	Labyrinthulomycetes	NA	NA	NA	NA
18SASV_337	Eukaryota	Cercozoa	Thecofilosea	Cryomonadida	Rhizaspididae	Rhogostoma
18SASV_338	Eukaryota	Arthropoda	Maxillopoda	Cyclopoida	NA	NA
18SASV_339	Eukaryota	Cryptomonadales	Cryptomonadales_cl	Cryptomonadales_or	Cryptomonadales_fa	Geminigera
18SASV_340	Eukaryota	Incertae_Sedis_ph	Incertae_Sedis_cl	Incertae_Sedis_or	Incertae_Sedis_fa	Telonema
18SASV_341	Eukaryota	Protalveolata	Syndiniales	Syndiniales_or	Syndiniales_Group_II	NA
18SASV_342	Eukaryota	Chlorophyta_ph	Prasinophytae	NA	NA	NA
18SASV_343	Eukaryota	Prymnesiophyceae	Prymnesiophyceae_cl	Prymnesiophyceae_or	Prymnesiophyceae_fa	Phaeocystis
18SASV_344	Eukaryota	NA	NA	NA	NA	NA
18SASV_345	Eukaryota	Protalveolata	Syndiniales	Syndiniales_or	Syndiniales_Group_II	NA
18SASV_346	Eukaryota	Cercozoa	Granofilosea	Granofilosea_or	Granofilosea_fa	Massisteria
18SASV_347	Eukaryota	Ochrophyta	Dictyochophyceae	Florenciellales	Florenciellales_fa	Pseudochattonella
18SASV_348	Eukaryota	Chlorophyta_ph	Mamiellophyceae	NA	NA	NA
18SASV_349	Eukaryota	Chlorophyta_ph	Mamiellophyceae	NA	NA	NA
18SASV_350	Eukaryota	Arthropoda	Maxillopoda	Harpacticoida	NA	NA
18SASV_351	Eukaryota	Protalveolata	Syndiniales	Syndiniales_or	Syndiniales_Group_II	NA
18SASV_352	Eukaryota	Ochrophyta	Diatomea	Bacillariophytina	Mediophyceae	NA
18SASV_353	Eukaryota	Chlorophyta_ph	Mamiellophyceae	NA	NA	NA
18SASV_354	Eukaryota	Dinoflagellata	Dinophyceae	Gymnodiniphycidae	Gymnodiniphycidae_fa	Gyrodinium
18SASV_355	Eukaryota	Cryptomonadales	Cryptomonadales_cl	Cryptomonadales_or	Cryptomonadales_fa	Geminigera
18SASV_356	Eukaryota	Ciliophora	Intramacronucleata	Spirotrichea	Oligotrichia	NA
18SASV_357	Eukaryota	NA	NA	NA	NA	NA
18SASV_358	Eukaryota	Protalveolata	Syndiniales	Syndiniales_or	Syndiniales_Group_II	NA
18SASV_359	Eukaryota	Dinoflagellata	Dinophyceae	Gymnodiniphycidae	Suessiaceae	Polarella
18SASV_360	Eukaryota	Ciliophora	Intramacronucleata	Spirotrichea	Choreotrichia	Cymatocylis
18SASV_361	Eukaryota	Protalveolata	Syndiniales	Syndiniales_or	Syndiniales_Group_III	NA
18SASV_362	Eukaryota	Cercozoa	Granofilosea	Granofilosea_or	Granofilosea_fa	Massisteria
18SASV_363	Eukaryota	Ochrophyta	Diatomea	Bacillariophytina	Mediophyceae	Odontella
18SASV_364	Eukaryota	Dinoflagellata	Dinophyceae	Gymnodiniphycidae	Gymnodinium_clade	NA
18SASV_365	Eukaryota	Dinoflagellata	Dinophyceae	Peridiniphycidae	NA	NA
18SASV_366	Eukaryota	Picozoa	Picomonadida	Picomonadidae	Picomonadidae_fa	Picomonas
18SASV_367	Eukaryota	Dinoflagellata	Dinophyceae	NA	NA	NA
18SASV_368	Eukaryota	Ochrophyta	Diatomea	Bacillariophytina	Mediophyceae	Chaetoceros
18SASV_369	Eukaryota	Ochrophyta	Pelagophyceae	Sarcinochrysidales	Sarcinochrysidales_fa	Sarcinochrysis
18SASV_370	Eukaryota	NA	NA	NA	NA	NA
18SASV_371	Eukaryota	Cercozoa	Granofilosea	Granofilosea_or	Granofilosea_fa	Massisteria
18SASV_372	Eukaryota	NA	NA	NA	NA	NA
18SASV_373	Eukaryota	Dinoflagellata	Dinophyceae	Gymnodiniphycidae	Kareniaceae	Karlodinium
18SASV_374	Eukaryota	Dinoflagellata	Dinophyceae	Gymnodiniphycidae	Gymnodiniphycidae_fa	Gyrodinium
18SASV_375	Eukaryota	Protalveolata	Syndiniales	Syndiniales_or	Syndiniales_fa	Amoebophrya
18SASV_376	Eukaryota	Dinoflagellata	Dinophyceae	NA	NA	NA
18SASV_377	Eukaryota	Protalveolata	Syndiniales	Syndiniales_or	Syndiniales_Group_II	NA
18SASV_378	Eukaryota	Protalveolata	Syndiniales	Syndiniales_or	Syndiniales_fa	Amoebophrya
18SASV_379	Eukaryota	Ochrophyta	Diatomea	Coscinodiscophytina	Fragilariales	Grammonema
18SASV_380	Eukaryota	Ochrophyta	Diatomea	Bacillariophytina	Bacillariophyceae	Fragilariopsis
18SASV_381	Eukaryota	Ochrophyta	Diatomea	Bacillariophytina	Mediophyceae	Chaetoceros
18SASV_382	Eukaryota	Protalveolata	Syndiniales	Syndiniales_or	Syndiniales_Group_II	NA
18SASV_383	Eukaryota	Protalveolata	Syndiniales	Syndiniales_or	Syndiniales_fa	Amoebophrya
18SASV_384	Eukaryota	NA	NA	NA	NA	NA
18SASV_385	Eukaryota	Ochrophyta	Diatomea	Bacillariophytina	Mediophyceae	NA
18SASV_386	Eukaryota	Protalveolata	Syndiniales	Syndiniales_or	Syndiniales_fa	Amoebophrya
18SASV_387	Eukaryota	Choanoflagellida	Acanthoecida	Stephanoecidae	Stephanoecidae_fa	Diaphanoeca
18SASV_388	Eukaryota	Ochrophyta	Diatomea	Bacillariophytina	Mediophyceae	NA
18SASV_389	Eukaryota	Cercozoa	Thecofilosea	Cryomonadida	Rhizaspididae	Rhogostoma
18SASV_390	Eukaryota	Protalveolata	Syndiniales	Syndiniales_or	Syndiniales_Group_II	NA
18SASV_391	Eukaryota	Protalveolata	Syndiniales	Syndiniales_or	Syndiniales_Group_II	NA
18SASV_392	Eukaryota	Ciliophora	Intramacronucleata	Conthreep	Oligohymenophorea	Homalogastra
18SASV_393	Eukaryota	Dinoflagellata	Dinophyceae	NA	NA	NA
18SASV_394	Eukaryota	Prymnesiophyceae	Prymnesiales	Prymnesiales_or	Prymnesiales_fa	Haptolina
18SASV_395	Eukaryota	Arthropoda	Maxillopoda	Cyclopoida	NA	NA
18SASV_396	Eukaryota	Protalveolata	Syndiniales	Syndiniales_or	Syndiniales_Group_II	NA
18SASV_397	Eukaryota	Cercozoa	Thecofilosea	Cryomonadida	Rhizaspididae	Rhogostoma
18SASV_398	Eukaryota	Cercozoa	Granofilosea	Granofilosea_or	Granofilosea_fa	Massisteria
18SASV_399	Eukaryota	Dinoflagellata	Dinophyceae	Peridiniphycidae	Peridiniales	Amphidiniopsis
18SASV_400	Eukaryota	Protalveolata	Syndiniales	Syndiniales_or	Syndiniales_Group_II	NA
18SASV_401	Eukaryota	Ochrophyta	Diatomea	Coscinodiscophytina	Rhizosolenids	Proboscia
18SASV_402	Eukaryota	Cercozoa	Thecofilosea	Cryomonadida	Rhizaspididae	Rhogostoma
18SASV_403	Eukaryota	Protalveolata	Syndiniales	Syndiniales_or	Syndiniales_Group_II	NA
18SASV_404	Eukaryota	Protalveolata	Syndiniales	Syndiniales_or	Syndiniales_Group_II	NA
18SASV_405	Eukaryota	Protalveolata	Syndiniales	Syndiniales_or	Syndiniales_fa	Amoebophrya
18SASV_406	Eukaryota	Ochrophyta	Diatomea	Bacillariophytina	Mediophyceae	NA
18SASV_407	Eukaryota	Protalveolata	Syndiniales	Syndiniales_or	Syndiniales_Group_I	NA
18SASV_408	Eukaryota	Protalveolata	Syndiniales	Syndiniales_or	Syndiniales_fa	Amoebophrya
18SASV_409	Eukaryota	Ochrophyta	Diatomea	Bacillariophytina	Mediophyceae	NA
18SASV_410	Eukaryota	Cercozoa	Thecofilosea	Cryomonadida	Rhizaspididae	Rhogostoma
18SASV_411	Eukaryota	Ochrophyta	Diatomea	Coscinodiscophytina	Corethrids	Corethron
18SASV_412	Eukaryota	Prymnesiophyceae	Prymnesiales	Prymnesiales_or	Prymnesiales_fa	Prymnesium
18SASV_413	Eukaryota	Cercozoa	NA	NA	NA	NA
18SASV_414	Eukaryota	Prymnesiophyceae	Prymnesiales	NA	NA	NA
18SASV_415	Eukaryota	Ochrophyta	Diatomea	Bacillariophytina	Bacillariophyceae	NA
18SASV_416	Eukaryota	MAST-3	MAST-3B	NA	NA	NA
18SASV_417	Eukaryota	Dinoflagellata	Dinophyceae	Gymnodiniphycidae	Gymnodiniphycidae_fa	Gyrodinium
18SASV_418	Eukaryota	Prymnesiophyceae	Prymnesiophyceae_cl	Prymnesiophyceae_or	Prymnesiophyceae_fa	Phaeocystis
18SASV_419	Eukaryota	Dinoflagellata	Dinophyceae	Peridiniphycidae	Thoracosphaeraceae	Pfiesteria
18SASV_420	Eukaryota	Protalveolata	Syndiniales	Syndiniales_or	Syndiniales_fa	Amoebophrya
18SASV_421	Eukaryota	Dinoflagellata	Dinophyceae	Gymnodiniphycidae	Gymnodinium_clade	Polykrikos
18SASV_422	Eukaryota	Ochrophyta	Chrysophyceae	Ochromonadales	Ochromonadales_fa	NA
18SASV_423	Eukaryota	Ochrophyta	Pelagophyceae	Sarcinochrysidales	Sarcinochrysidales_fa	SS1-E01-69
18SASV_424	Eukaryota	Ochrophyta	Diatomea	NA	NA	NA
18SASV_425	Eukaryota	Ochrophyta	Diatomea	Bacillariophytina	Bacillariophyceae	NA
18SASV_426	Eukaryota	Prymnesiophyceae	Prymnesiales	Prymnesiales_or	Prymnesiales_fa	NA
18SASV_427	Eukaryota	Choanoflagellida	Acanthoecida	Stephanoecidae	Stephanoecidae_fa	Marine_Choanoflagellates_1
18SASV_428	Eukaryota	Prymnesiophyceae	Prymnesiales	Prymnesiales_or	Prymnesiales_fa	NA
18SASV_429	Eukaryota	Cercozoa	Thecofilosea	Cryomonadida	Rhizaspididae	Rhogostoma
18SASV_430	Eukaryota	Cercozoa	Thecofilosea	Cryomonadida	Rhizaspididae	Rhogostoma
18SASV_431	Eukaryota	Ochrophyta	Diatomea	Bacillariophytina	Bacillariophyceae	Navicula
18SASV_432	Eukaryota	Cryptomonadales	Cryptomonadales_cl	Cryptomonadales_or	Cryptomonadales_fa	Geminigera
18SASV_433	Eukaryota	Ochrophyta	Chrysophyceae	NA	NA	NA
18SASV_434	Eukaryota	Protalveolata	Syndiniales	Syndiniales_or	Syndiniales_Group_II	NA
18SASV_435	Eukaryota	Protalveolata	Syndiniales	Syndiniales_or	Syndiniales_fa	Amoebophrya
18SASV_436	Eukaryota	Ochrophyta	Diatomea	Coscinodiscophytina	NA	NA
18SASV_437	Eukaryota	Dinoflagellata	Dinophyceae	NA	NA	NA
18SASV_438	Eukaryota	Ochrophyta	Diatomea	Bacillariophytina	Bacillariophyceae	Fragilariopsis
18SASV_439	Eukaryota	Prymnesiophyceae	Prymnesiales	NA	NA	NA
18SASV_440	Eukaryota	Protalveolata	Syndiniales	Syndiniales_or	Syndiniales_Group_II	NA
18SASV_441	Eukaryota	Protalveolata	Syndiniales	Syndiniales_or	Syndiniales_Group_II	NA
18SASV_442	Eukaryota	Dinoflagellata	Dinophyceae	Gymnodiniphycidae	Gymnodiniphycidae_fa	Gyrodinium
18SASV_443	Eukaryota	Cryptomonadales	Cryptomonadales_cl	Cryptomonadales_or	Cryptomonadales_fa	Geminigera
18SASV_444	Eukaryota	Ciliophora	Intramacronucleata	Conthreep	Phyllopharyngea	NA
18SASV_445	Eukaryota	Protalveolata	Syndiniales	Syndiniales_or	Syndiniales_Group_II	NA
18SASV_446	Eukaryota	Ciliophora	Intramacronucleata	Spirotrichea	Choreotrichia	Rimostrombidium
18SASV_447	Eukaryota	Ochrophyta	Chrysophyceae	Chromulinales	Chromulinales_fa	Spumella
18SASV_448	Eukaryota	Cercozoa	Imbricatea	Marimonadida	Marimonadida_fa	Pseudopirsonia
18SASV_449	Eukaryota	Protalveolata	Syndiniales	Syndiniales_or	Syndiniales_Group_II	NA
18SASV_450	Eukaryota	Protalveolata	Syndiniales	Syndiniales_or	Syndiniales_Group_I	NA
18SASV_451	Eukaryota	Protalveolata	Syndiniales	Syndiniales_or	Syndiniales_Group_II	NA
18SASV_452	Eukaryota	Cercozoa	Thecofilosea	Cryomonadida	Rhizaspididae	Rhogostoma
18SASV_453	Eukaryota	Ochrophyta	Diatomea	Bacillariophytina	Mediophyceae	Thalassiosira
18SASV_454	Eukaryota	Cercozoa	Thecofilosea	Cryomonadida	Rhizaspididae	Rhogostoma
18SASV_455	Eukaryota	Cercozoa	Granofilosea	Granofilosea_or	Granofilosea_fa	Massisteria
18SASV_456	Eukaryota	Dinoflagellata	Dinophyceae	Gymnodiniphycidae	Gymnodiniphycidae_fa	Gyrodinium
18SASV_457	Eukaryota	Ochrophyta	MOCH-2	NA	NA	NA
18SASV_458	Eukaryota	NA	NA	NA	NA	NA
18SASV_459	Eukaryota	Ochrophyta	Diatomea	Bacillariophytina	Bacillariophyceae	Pseudo-nitzschia
18SASV_460	Eukaryota	Ochrophyta	Diatomea	Coscinodiscophytina	Rhizosolenids	Guinardia
18SASV_461	Eukaryota	Cercozoa	Granofilosea	Granofilosea_or	Granofilosea_fa	Massisteria
18SASV_462	Eukaryota	Protalveolata	Syndiniales	Syndiniales_or	Syndiniales_Group_II	NA
18SASV_463	Eukaryota	Cercozoa	Imbricatea	Marimonadida	Marimonadida_fa	Pseudopirsonia
18SASV_464	Eukaryota	Ochrophyta	Pelagophyceae	Sarcinochrysidales	Sarcinochrysidales_fa	SS1-E01-69
18SASV_465	Eukaryota	Dinoflagellata	Dinophyceae	NA	NA	NA
18SASV_466	Eukaryota	NA	NA	NA	NA	NA
18SASV_467	Eukaryota	Dinoflagellata	Dinophyceae	Peridiniphycidae	Gonyaulacales	Azadinium
18SASV_468	Eukaryota	Protalveolata	Syndiniales	Syndiniales_or	Syndiniales_fa	Amoebophrya
18SASV_469	Eukaryota	Cercozoa	Thecofilosea	Cryomonadida	Rhizaspididae	Rhogostoma
18SASV_470	Eukaryota	Protalveolata	Syndiniales	Syndiniales_or	Syndiniales_fa	Amoebophrya
18SASV_471	Eukaryota	Prymnesiophyceae	NA	NA	NA	NA
18SASV_472	Eukaryota	NA	NA	NA	NA	NA
18SASV_473	Eukaryota	Ochrophyta	Diatomea	Bacillariophytina	NA	NA
18SASV_474	Eukaryota	Ochrophyta	Dictyochophyceae	Pedinellales	NA	NA
18SASV_475	Eukaryota	Protalveolata	Syndiniales	Syndiniales_or	Syndiniales_fa	Amoebophrya
18SASV_476	Eukaryota	Ochrophyta	Diatomea	Bacillariophytina	Bacillariophyceae	Fragilariopsis
18SASV_477	Eukaryota	Cercozoa	Thecofilosea	Cryomonadida	Rhizaspididae	Rhogostoma
18SASV_478	Eukaryota	Dinoflagellata	Dinophyceae	Gymnodiniphycidae	Gymnodiniphycidae_fa	Gyrodinium
18SASV_479	Eukaryota	Dinoflagellata	Dinophyceae	Peridiniphycidae	Peridiniales	Heterocapsa
18SASV_480	Eukaryota	Ciliophora	Intramacronucleata	Spirotrichea	Oligotrichia	Spirostrombidium
18SASV_481	Eukaryota	Dinoflagellata	Dinophyceae	Peridiniphycidae	Thoracosphaeraceae	Scrippsiella
18SASV_482	Eukaryota	Cercozoa	Thecofilosea	Cryomonadida	Rhizaspididae	Rhogostoma
18SASV_483	Eukaryota	Incertae_Sedis_ph	Incertae_Sedis_cl	Incertae_Sedis_or	Incertae_Sedis_fa	Telonema
18SASV_484	Eukaryota	Ciliophora	Intramacronucleata	Spirotrichea	Oligotrichia	NA
18SASV_485	Eukaryota	Ochrophyta	Diatomea	Bacillariophytina	Mediophyceae	Chaetoceros
18SASV_486	Eukaryota	Dinoflagellata	Dinophyceae	Gymnodiniphycidae	Gymnodiniphycidae_fa	Gyrodinium
18SASV_487	Eukaryota	Incertae_Sedis_ph	Incertae_Sedis_cl	Incertae_Sedis_or	Incertae_Sedis_fa	Telonema
18SASV_488	Eukaryota	Ciliophora	Intramacronucleata	Litostomatea	Haptoria	Didinium
18SASV_489	Eukaryota	Ochrophyta	Eustigmatophyceae	Eustigmatales	Eustigmatales_fa	NA
18SASV_490	Eukaryota	Cercozoa	Thecofilosea	Cryomonadida	Rhizaspididae	Rhogostoma
18SASV_491	Eukaryota	Protalveolata	Syndiniales	Syndiniales_or	Syndiniales_fa	Amoebophrya
18SASV_492	Eukaryota	Picozoa	Picomonadida	Picomonadidae	Picomonadidae_fa	Picomonas
18SASV_493	Eukaryota	Dinoflagellata	Dinophyceae	Peridiniphycidae	Peridiniales	Islandinium
18SASV_494	Eukaryota	Dinoflagellata	Dinophyceae	Gymnodiniphycidae	Gymnodiniphycidae_fa	Gyrodinium
18SASV_495	Eukaryota	Incertae_Sedis_ph	Incertae_Sedis_cl	Incertae_Sedis_or	Incertae_Sedis_fa	Telonema
18SASV_496	Eukaryota	Protalveolata	Syndiniales	Syndiniales_or	Syndiniales_Group_II	NA
18SASV_497	Eukaryota	Protalveolata	Syndiniales	Syndiniales_or	Syndiniales_fa	Amoebophrya
18SASV_498	Eukaryota	Ciliophora	Intramacronucleata	Spirotrichea	Oligotrichia	NA
18SASV_499	Eukaryota	Dinoflagellata	Dinophyceae	NA	NA	NA
18SASV_500	Eukaryota	Cercozoa	NA	NA	NA	NA
18SASV_501	Eukaryota	Protalveolata	Syndiniales	Syndiniales_or	Syndiniales_Group_II	NA
18SASV_502	Eukaryota	Prymnesiophyceae	NA	NA	NA	NA
18SASV_503	Eukaryota	NA	NA	NA	NA	NA
18SASV_504	Eukaryota	Ochrophyta	Chrysophyceae	Ochromonadales	Ochromonadales_fa	Paraphysomonas
18SASV_505	Eukaryota	Ochrophyta	Diatomea	Bacillariophytina	Mediophyceae	NA
18SASV_506	Eukaryota	Ochrophyta	Dictyochophyceae	Pedinellales	Pedinellales_fa	Pedinella
18SASV_507	Eukaryota	Prymnesiophyceae	Prymnesiales	Prymnesiales_or	Prymnesiales_fa	NA
18SASV_508	Eukaryota	Protalveolata	Syndiniales	Syndiniales_or	Syndiniales_fa	Amoebophrya
18SASV_509	Eukaryota	Protalveolata	Syndiniales	Syndiniales_or	Syndiniales_Group_II	NA
18SASV_510	Eukaryota	Dinoflagellata	Dinophyceae	Gymnodiniphycidae	NA	NA
18SASV_511	Eukaryota	Cryptomonadales	Cryptomonadales_cl	Cryptomonadales_or	Cryptomonadales_fa	Geminigera
18SASV_512	Eukaryota	Ochrophyta	Diatomea	Coscinodiscophytina	Rhizosolenids	Proboscia
18SASV_513	Eukaryota	Ciliophora	Intramacronucleata	Conthreep	Phyllopharyngea	Acineta
18SASV_514	Eukaryota	NA	NA	NA	NA	NA
18SASV_515	Eukaryota	Protalveolata	Syndiniales	Syndiniales_or	Syndiniales_Group_II	NA
18SASV_516	Eukaryota	Ochrophyta	Diatomea	Bacillariophytina	Bacillariophyceae	Fragilariopsis
18SASV_517	Eukaryota	Ochrophyta	Diatomea	Bacillariophytina	Bacillariophyceae	Nitzschia
18SASV_518	Eukaryota	Cercozoa	Imbricatea	Marimonadida	Marimonadida_fa	Pseudopirsonia
18SASV_519	Eukaryota	Cryptomonadales	Cryptomonadales_cl	Cryptomonadales_or	Cryptomonadales_fa	Geminigera
18SASV_520	Eukaryota	Picozoa	Picomonadida	Picomonadidae	Picomonadidae_fa	Picomonas
18SASV_521	Eukaryota	Dinoflagellata	Dinophyceae	Gymnodiniphycidae	Gymnodiniphycidae_fa	Gyrodinium
18SASV_522	Eukaryota	Cercozoa	Thecofilosea	Cryomonadida	Rhizaspididae	Rhogostoma
18SASV_523	Eukaryota	Ochrophyta	Diatomea	Bacillariophytina	Mediophyceae	NA
18SASV_524	Eukaryota	Ciliophora	Intramacronucleata	Conthreep	Oligohymenophorea	Homalogastra
18SASV_525	Eukaryota	Ochrophyta	Diatomea	Coscinodiscophytina	Corethrids	Corethron
18SASV_526	Eukaryota	Ochrophyta	Chrysophyceae	Ochromonadales	Ochromonadales_fa	NA
18SASV_527	Eukaryota	Cercozoa	Imbricatea	Marimonadida	Marimonadida_fa	Pseudopirsonia
18SASV_528	Eukaryota	Dinoflagellata	Dinophyceae	Peridiniphycidae	Gonyaulacales	Azadinium
18SASV_529	Eukaryota	Dinoflagellata	Dinophyceae	Gymnodiniphycidae	Gymnodiniphycidae_fa	Gyrodinium
18SASV_530	Eukaryota	Cercozoa	NA	NA	NA	NA
18SASV_531	Eukaryota	Ciliophora	Intramacronucleata	Spirotrichea	Oligotrichia	Spirostrombidium
18SASV_532	Eukaryota	Ochrophyta	Diatomea	Coscinodiscophytina	Corethrids	Corethron
18SASV_533	Eukaryota	Dinoflagellata	Dinophyceae	Gymnodiniphycidae	Gymnodiniphycidae_fa	Gyrodinium
18SASV_534	Eukaryota	Dinoflagellata	Dinophyceae	NA	NA	NA
18SASV_535	Eukaryota	NA	NA	NA	NA	NA
18SASV_536	Eukaryota	Protalveolata	Syndiniales	Syndiniales_or	Syndiniales_Group_II	NA
18SASV_537	Eukaryota	Ochrophyta	Diatomea	Bacillariophytina	Bacillariophyceae	NA
18SASV_538	Eukaryota	Dinoflagellata	Dinophyceae	NA	NA	NA
18SASV_539	Eukaryota	Ochrophyta	Diatomea	Bacillariophytina	Mediophyceae	Chaetoceros
18SASV_540	Eukaryota	Chlorophyta_ph	Mamiellophyceae	Mamiellales	Mamiellales_fa	Micromonas
18SASV_541	Eukaryota	MAST-3	MAST-3B	NA	NA	NA
18SASV_542	Eukaryota	Cercozoa	Imbricatea	Marimonadida	Marimonadida_fa	Pseudopirsonia
18SASV_543	Eukaryota	Protalveolata	Syndiniales	Syndiniales_or	Syndiniales_Group_II	NA
18SASV_544	Eukaryota	NA	NA	NA	NA	NA
18SASV_545	Eukaryota	Ochrophyta	Diatomea	Bacillariophytina	Mediophyceae	NA
18SASV_546	Eukaryota	Picozoa	Picomonadida	Picomonadidae	Picomonadidae_fa	Picomonas
18SASV_547	Eukaryota	Incertae_Sedis	NA	NA	NA	NA
18SASV_548	Eukaryota	Protalveolata	Syndiniales	Syndiniales_or	Syndiniales_fa	Amoebophrya
18SASV_549	Eukaryota	Protalveolata	Syndiniales	Syndiniales_or	Syndiniales_fa	Amoebophrya
18SASV_550	Eukaryota	Protalveolata	Syndiniales	Syndiniales_or	Syndiniales_fa	Amoebophrya
18SASV_551	Eukaryota	Ochrophyta	Diatomea	Bacillariophytina	Bacillariophyceae	Fragilariopsis
18SASV_552	Eukaryota	Dinoflagellata	Dinophyceae	Gymnodiniphycidae	Gymnodiniphycidae_fa	Gyrodinium
18SASV_553	Eukaryota	Ochrophyta	Diatomea	Bacillariophytina	Bacillariophyceae	Pseudo-nitzschia
18SASV_554	Eukaryota	Cercozoa	NA	NA	NA	NA
18SASV_555	Eukaryota	Dinoflagellata	Dinophyceae	NA	NA	NA
18SASV_556	Eukaryota	Ochrophyta	Diatomea	Bacillariophytina	Mediophyceae	Porosira
18SASV_557	Eukaryota	Cercozoa	NA	NA	NA	NA
18SASV_558	Eukaryota	Prymnesiophyceae	Prymnesiophyceae_cl	Prymnesiophyceae_or	Prymnesiophyceae_fa	Phaeocystis
18SASV_559	Eukaryota	Protalveolata	Syndiniales	Syndiniales_or	Syndiniales_Group_II	NA
18SASV_560	Eukaryota	Protalveolata	Syndiniales	Syndiniales_or	Syndiniales_Group_II	NA
18SASV_561	Eukaryota	Ochrophyta	Diatomea	Bacillariophytina	Bacillariophyceae	Fragilariopsis
18SASV_562	Eukaryota	Protalveolata	Syndiniales	Syndiniales_or	Syndiniales_Group_II	NA
18SASV_563	Eukaryota	Ochrophyta	Dictyochophyceae	Florenciellales	Florenciellales_fa	Pseudochattonella
18SASV_564	Eukaryota	Protalveolata	Syndiniales	Syndiniales_or	Syndiniales_fa	Amoebophrya
18SASV_565	Eukaryota	Dinoflagellata	Dinophyceae	Peridiniphycidae	Gonyaulacales	Azadinium
18SASV_566	Eukaryota	Dinoflagellata	Dinophyceae	Gymnodiniphycidae	Gymnodiniphycidae_fa	Gyrodinium
18SASV_567	Eukaryota	Dinoflagellata	Dinophyceae	Gymnodiniphycidae	Gymnodiniphycidae_fa	Gyrodinium
18SASV_568	Eukaryota	Cercozoa	NA	NA	NA	NA
18SASV_569	Eukaryota	Protalveolata	Syndiniales	Syndiniales_or	Syndiniales_Group_II	NA
18SASV_570	Eukaryota	NA	NA	NA	NA	NA
18SASV_571	Eukaryota	Cercozoa	Thecofilosea	Cryomonadida	Rhizaspididae	Rhogostoma
18SASV_572	Eukaryota	Chlorophyta_ph	Mamiellophyceae	Mamiellales	Mamiellales_fa	Micromonas
18SASV_573	Eukaryota	Incertae_Sedis_ph	Incertae_Sedis_cl	Incertae_Sedis_or	Incertae_Sedis_fa	Telonema
18SASV_574	Eukaryota	Picozoa	Picomonadida	Picomonadidae	Picomonadidae_fa	Picomonas
18SASV_575	Eukaryota	Cryptomonadales	Cryptomonadales_cl	Cryptomonadales_or	Cryptomonadales_fa	Geminigera
18SASV_576	Eukaryota	Ochrophyta	Dictyochophyceae	Pedinellales	Pedinellales_fa	Pteridomonas
18SASV_577	Eukaryota	NA	NA	NA	NA	NA
18SASV_578	Eukaryota	Protalveolata	Syndiniales	Syndiniales_or	Syndiniales_fa	Amoebophrya
18SASV_579	Eukaryota	MAST-12	MAST-12A	NA	NA	NA
18SASV_580	Eukaryota	Cercozoa	Thecofilosea	Cryomonadida	Rhizaspididae	Rhogostoma
18SASV_581	Eukaryota	Dinoflagellata	Dinophyceae	Gymnodiniphycidae	Kareniaceae	Karlodinium
18SASV_582	Eukaryota	Ochrophyta	Diatomea	NA	NA	NA
18SASV_583	Eukaryota	Ochrophyta	Dictyochophyceae	Pedinellales	NA	NA
18SASV_584	Eukaryota	Dinoflagellata	Dinophyceae	Gymnodiniphycidae	Gymnodiniphycidae_fa	Gyrodinium
18SASV_585	Eukaryota	Ochrophyta	Diatomea	Bacillariophytina	Bacillariophyceae	Nitzschia
18SASV_586	Eukaryota	MAST-3	MAST-3B	NA	NA	NA
18SASV_587	Eukaryota	Ochrophyta	Chrysophyceae	NA	NA	NA
18SASV_588	Eukaryota	NA	NA	NA	NA	NA
18SASV_589	Eukaryota	Protalveolata	Syndiniales	Syndiniales_or	Syndiniales_Group_II	NA
18SASV_590	Eukaryota	NA	NA	NA	NA	NA
18SASV_591	Eukaryota	Dinoflagellata	Dinophyceae	Peridiniphycidae	NA	NA
18SASV_592	Eukaryota	Dinoflagellata	Dinophyceae	Gymnodiniphycidae	Gymnodinium_clade	NA
18SASV_593	Eukaryota	Dinoflagellata	Dinophyceae	Gymnodiniphycidae	Gymnodinium_clade	Polykrikos
18SASV_594	Eukaryota	Protalveolata	Syndiniales	Syndiniales_or	Syndiniales_fa	Amoebophrya
18SASV_595	Eukaryota	Dinoflagellata	Dinophyceae	Gymnodiniphycidae	NA	NA
18SASV_596	Eukaryota	NA	NA	NA	NA	NA
18SASV_597	Eukaryota	NA	NA	NA	NA	NA
18SASV_598	Eukaryota	Ciliophora	Intramacronucleata	Conthreep	Prostomatea	Cryptocaryon
18SASV_599	Eukaryota	Chytridiomycota	Incertae_Sedis	Rhizophydiales	NA	NA
18SASV_600	Eukaryota	Dinoflagellata	Dinophyceae	NA	NA	NA
18SASV_601	Eukaryota	NA	NA	NA	NA	NA
18SASV_602	Eukaryota	Protalveolata	Syndiniales	Syndiniales_or	Syndiniales_fa	Amoebophrya
18SASV_603	Eukaryota	Dinoflagellata	Dinophyceae	Gymnodiniphycidae	NA	NA
18SASV_604	Eukaryota	Cercozoa	Imbricatea	Marimonadida	Marimonadida_fa	Pseudopirsonia
18SASV_605	Eukaryota	Protalveolata	Syndiniales	Syndiniales_or	Syndiniales_fa	Amoebophrya
18SASV_606	Eukaryota	Protalveolata	Syndiniales	Syndiniales_or	Syndiniales_fa	Amoebophrya
18SASV_607	Eukaryota	Incertae_Sedis	NA	NA	NA	NA
18SASV_608	Eukaryota	Dinoflagellata	Dinophyceae	Gymnodiniphycidae	Gymnodiniphycidae_fa	Gyrodinium
18SASV_609	Eukaryota	Protalveolata	Syndiniales	Syndiniales_or	Syndiniales_fa	Amoebophrya
18SASV_610	Eukaryota	Prymnesiophyceae	Prymnesiales	Prymnesiales_or	Prymnesiales_fa	NA
18SASV_611	Eukaryota	Cercozoa	Granofilosea	Granofilosea_or	Granofilosea_fa	Massisteria
18SASV_612	Eukaryota	Cercozoa	Imbricatea	Marimonadida	Marimonadida_fa	Pseudopirsonia
18SASV_613	Eukaryota	Cercozoa	Granofilosea	Granofilosea_or	Granofilosea_fa	Massisteria
18SASV_614	Eukaryota	Dinoflagellata	Dinophyceae	NA	NA	NA
18SASV_615	Eukaryota	Chlorophyta_ph	Mamiellophyceae	Mamiellales	Mamiellales_fa	NA
18SASV_616	Eukaryota	Dinoflagellata	Dinophyceae	NA	NA	NA
18SASV_617	Eukaryota	Ochrophyta	Diatomea	Bacillariophytina	Bacillariophyceae	Fragilariopsis
18SASV_618	Eukaryota	Ochrophyta	Pelagophyceae	Sarcinochrysidales	Sarcinochrysidales_fa	SS1-E01-69
18SASV_619	Eukaryota	Ochrophyta	Diatomea	Bacillariophytina	Bacillariophyceae	Fragilariopsis
18SASV_620	Eukaryota	Dinoflagellata	Dinophyceae	Gymnodiniphycidae	Gymnodiniphycidae_fa	Gyrodinium
18SASV_621	Eukaryota	Protalveolata	Syndiniales	Syndiniales_or	Syndiniales_fa	Amoebophrya
18SASV_622	Eukaryota	NA	NA	NA	NA	NA
18SASV_623	Eukaryota	Protalveolata	Syndiniales	Syndiniales_or	Syndiniales_Group_II	NA
18SASV_624	Eukaryota	Dinoflagellata	Dinophyceae	Peridiniphycidae	Gonyaulacales	Azadinium
18SASV_625	Eukaryota	Ochrophyta	Diatomea	Bacillariophytina	Bacillariophyceae	NA
18SASV_626	Eukaryota	Cercozoa	Thecofilosea	Cryomonadida	Rhizaspididae	Rhogostoma
18SASV_627	Eukaryota	Ochrophyta	Diatomea	Coscinodiscophytina	Corethrids	Corethron
18SASV_628	Eukaryota	Ochrophyta	Diatomea	Coscinodiscophytina	Fragilariales	Licmophora
18SASV_629	Eukaryota	Ciliophora	Intramacronucleata	Conthreep	Phyllopharyngea	Pithites
18SASV_630	Eukaryota	Ochrophyta	Pelagophyceae	Sarcinochrysidales	Sarcinochrysidales_fa	SS1-E01-69
18SASV_631	Eukaryota	Ochrophyta	Pelagophyceae	Sarcinochrysidales	Sarcinochrysidales_fa	SS1-E01-69
18SASV_632	Eukaryota	Dinoflagellata	Dinophyceae	Gymnodiniphycidae	Gymnodiniphycidae_fa	Gyrodinium
18SASV_633	Eukaryota	Ochrophyta	NA	NA	NA	NA
18SASV_634	Eukaryota	NA	NA	NA	NA	NA
18SASV_635	Eukaryota	Dinoflagellata	Dinophyceae	Gymnodiniphycidae	Gymnodiniphycidae_fa	Gyrodinium
18SASV_636	Eukaryota	Ochrophyta	Diatomea	Bacillariophytina	Mediophyceae	Chaetoceros
18SASV_637	Eukaryota	Cercozoa	NA	NA	NA	NA
18SASV_638	Eukaryota	NA	NA	NA	NA	NA
18SASV_639	Eukaryota	Dinoflagellata	Dinophyceae	Peridiniphycidae	NA	NA
18SASV_640	Eukaryota	Protalveolata	Syndiniales	Syndiniales_or	Syndiniales_fa	Amoebophrya
18SASV_641	Eukaryota	NA	NA	NA	NA	NA
18SASV_642	Eukaryota	Arthropoda	Maxillopoda	Calanoida	NA	NA
18SASV_643	Eukaryota	Cercozoa	Thecofilosea	Cryomonadida	Rhizaspididae	Rhogostoma
18SASV_644	Eukaryota	Ciliophora	Intramacronucleata	Conthreep	Phyllopharyngea	Pithites
18SASV_645	Eukaryota	Prymnesiophyceae	Prymnesiophyceae_cl	Prymnesiophyceae_or	Prymnesiophyceae_fa	Phaeocystis
18SASV_646	Eukaryota	Protalveolata	Syndiniales	Syndiniales_or	Syndiniales_fa	Amoebophrya
18SASV_647	Eukaryota	Ochrophyta	Dictyochophyceae	Pedinellales	NA	NA
18SASV_648	Eukaryota	Ochrophyta	Diatomea	Bacillariophytina	Bacillariophyceae	Fragilariopsis
18SASV_649	Eukaryota	Ochrophyta	Diatomea	Bacillariophytina	Mediophyceae	Chaetoceros
18SASV_650	Eukaryota	Incertae_Sedis_ph	Incertae_Sedis_cl	Incertae_Sedis_or	Incertae_Sedis_fa	Telonema
18SASV_651	Eukaryota	Ciliophora	Intramacronucleata	Spirotrichea	Oligotrichia	NA
18SASV_652	Eukaryota	NA	NA	NA	NA	NA
18SASV_653	Eukaryota	Prymnesiophyceae	Prymnesiophyceae_cl	Prymnesiophyceae_or	Prymnesiophyceae_fa	Phaeocystis
18SASV_654	Eukaryota	Ciliophora	Intramacronucleata	Conthreep	Oligohymenophorea	Homalogastra
18SASV_655	Eukaryota	Protalveolata	Syndiniales	Syndiniales_or	Syndiniales_Group_II	NA
18SASV_656	Eukaryota	Dinoflagellata	Dinophyceae	Peridiniphycidae	Gonyaulacales	Azadinium
18SASV_657	Eukaryota	NA	NA	NA	NA	NA
18SASV_658	Eukaryota	Incertae_Sedis_ph	Incertae_Sedis_cl	Incertae_Sedis_or	Incertae_Sedis_fa	Telonema
18SASV_659	Eukaryota	Ochrophyta	Diatomea	Coscinodiscophytina	Corethrids	Corethron
18SASV_660	Eukaryota	Dinoflagellata	Dinophyceae	Gymnodiniphycidae	NA	NA
18SASV_661	Eukaryota	Dinoflagellata	Dinophyceae	NA	NA	NA
18SASV_662	Eukaryota	Protalveolata	Syndiniales	Syndiniales_or	Syndiniales_Group_II	NA
18SASV_663	Eukaryota	Ochrophyta	Chrysophyceae	Ochromonadales	Ochromonadales_fa	Paraphysomonas
18SASV_664	Eukaryota	Picozoa	Picomonadida	Picomonadidae	Picomonadidae_fa	Picomonas
18SASV_665	Eukaryota	Dinoflagellata	Dinophyceae	Gymnodiniphycidae	Gymnodinium_clade	NA
18SASV_666	Eukaryota	Dinoflagellata	Dinophyceae	Gymnodiniphycidae	Gymnodiniphycidae_fa	Gyrodinium
18SASV_667	Eukaryota	Chlorophyta_ph	Mamiellophyceae	Mamiellophyceae_or	Mamiellophyceae_fa	Dolichomastix
18SASV_668	Eukaryota	Ochrophyta	Diatomea	Coscinodiscophytina	Rhizosolenids	Proboscia
18SASV_669	Eukaryota	NA	NA	NA	NA	NA
18SASV_670	Eukaryota	Protalveolata	Syndiniales	Syndiniales_or	Syndiniales_Group_I	NA
18SASV_671	Eukaryota	Protalveolata	Syndiniales	Syndiniales_or	Syndiniales_fa	Amoebophrya
18SASV_672	Eukaryota	Dinoflagellata	Dinophyceae	Gymnodiniphycidae	Gymnodiniphycidae_fa	Gyrodinium
18SASV_673	Eukaryota	Cercozoa	Imbricatea	Marimonadida	Marimonadida_fa	Pseudopirsonia
18SASV_674	Eukaryota	Protalveolata	Syndiniales	Syndiniales_or	NA	NA
18SASV_675	Eukaryota	NA	NA	NA	NA	NA
18SASV_676	Eukaryota	Choanoflagellida	Acanthoecida	Stephanoecidae	Stephanoecidae_fa	Marine_Choanoflagellates_1
18SASV_677	Eukaryota	Ochrophyta	Diatomea	Bacillariophytina	Mediophyceae	NA
18SASV_678	Eukaryota	Protalveolata	Syndiniales	Syndiniales_or	Syndiniales_Group_II	NA
18SASV_679	Eukaryota	Chlorophyta_ph	Prasinophytae	NA	NA	NA
18SASV_680	Eukaryota	Cryptomonadales	Cryptomonadales_cl	Cryptomonadales_or	Cryptomonadales_fa	Geminigera
18SASV_681	Eukaryota	Chlorophyta_ph	Mamiellophyceae	Mamiellales	Mamiellales_fa	NA
18SASV_682	Eukaryota	Protalveolata	Syndiniales	Syndiniales_or	Syndiniales_Group_II	NA
18SASV_683	Eukaryota	Protalveolata	Syndiniales	Syndiniales_or	Syndiniales_Group_II	NA
18SASV_684	Eukaryota	Dinoflagellata	Dinophyceae	Gymnodiniphycidae	Gymnodiniphycidae_fa	Gyrodinium
18SASV_685	Eukaryota	Ochrophyta	Ochrophyta_cl	Ochrophyta_or	Ochrophyta_fa	Bolidomonas
18SASV_686	Eukaryota	NA	NA	NA	NA	NA
18SASV_687	Eukaryota	Florideophycidae	Rhodymeniophycidae	NA	NA	NA
18SASV_688	Eukaryota	Cryptomonadales	Cryptomonadales_cl	Cryptomonadales_or	Cryptomonadales_fa	Geminigera
18SASV_689	Eukaryota	Ochrophyta	Diatomea	Bacillariophytina	Bacillariophyceae	Fragilariopsis
18SASV_690	Eukaryota	Dinoflagellata	Dinophyceae	Peridiniphycidae	Thoracosphaeraceae	Scrippsiella
18SASV_691	Eukaryota	Incertae_Sedis	NA	NA	NA	NA
18SASV_692	Eukaryota	Chlorophyta_ph	Chlorophyceae	NA	NA	NA
18SASV_693	Eukaryota	MAST-3	MAST-3B	NA	NA	NA
18SASV_694	Eukaryota	Chlorophyta_ph	Mamiellophyceae	NA	NA	NA
18SASV_695	Eukaryota	Arthropoda	Maxillopoda	Cyclopoida	NA	NA
18SASV_696	Eukaryota	Ciliophora	Intramacronucleata	Spirotrichea	Choreotrichia	NA
18SASV_697	Eukaryota	Ciliophora	Intramacronucleata	Spirotrichea	Oligotrichia	NA
18SASV_698	Eukaryota	Dinoflagellata	Dinophyceae	NA	NA	NA
18SASV_699	Eukaryota	Cercozoa	NA	NA	NA	NA
18SASV_700	Eukaryota	Ochrophyta	Eustigmatophyceae	Eustigmatales	Eustigmatales_fa	NA
18SASV_701	Eukaryota	Dinoflagellata	Dinophyceae	Peridiniphycidae	Gonyaulacales	Azadinium
18SASV_702	Eukaryota	Dinoflagellata	Dinophyceae	Gymnodiniphycidae	NA	NA
18SASV_703	Eukaryota	Protalveolata	Syndiniales	Syndiniales_or	Syndiniales_fa	Amoebophrya
18SASV_704	Eukaryota	Arthropoda	Maxillopoda	Calanoida	NA	NA
18SASV_705	Eukaryota	Protalveolata	Syndiniales	Syndiniales_or	Syndiniales_Group_I	NA
18SASV_706	Eukaryota	Cercozoa	NA	NA	NA	NA
18SASV_707	Eukaryota	Dinoflagellata	Dinophyceae	NA	NA	NA
18SASV_708	Eukaryota	Protalveolata	Syndiniales	Syndiniales_or	Syndiniales_fa	Amoebophrya
18SASV_709	Eukaryota	NA	NA	NA	NA	NA
18SASV_710	Eukaryota	Cercozoa	NA	NA	NA	NA
18SASV_711	Eukaryota	Protalveolata	Syndiniales	Syndiniales_or	Syndiniales_fa	Amoebophrya
18SASV_712	Eukaryota	Protalveolata	Syndiniales	Syndiniales_or	Syndiniales_fa	Amoebophrya
18SASV_713	Eukaryota	NA	NA	NA	NA	NA
18SASV_714	Eukaryota	Cercozoa	NA	NA	NA	NA
18SASV_715	Eukaryota	Protalveolata	Syndiniales	Syndiniales_or	Syndiniales_Group_II	NA
18SASV_716	Eukaryota	Ochrophyta	Diatomea	Coscinodiscophytina	Corethrids	Corethron
18SASV_717	Eukaryota	Ochrophyta	NA	NA	NA	NA
18SASV_718	Eukaryota	Picozoa	Picomonadida	Picomonadidae	Picomonadidae_fa	Picomonas
18SASV_719	Eukaryota	Ciliophora	Intramacronucleata	Conthreep	Phyllopharyngea	Ephelota
18SASV_720	Eukaryota	Ochrophyta	Raphidophyceae	Chattonellales	Chattonellales_fa	Haramonas
18SASV_721	Eukaryota	Ochrophyta	Diatomea	Coscinodiscophytina	NA	NA
18SASV_722	Eukaryota	Dinoflagellata	Dinophyceae	NA	NA	NA
18SASV_723	Eukaryota	Protalveolata	Syndiniales	Syndiniales_or	Syndiniales_fa	Amoebophrya
18SASV_724	Eukaryota	Ochrophyta	Pelagophyceae	Sarcinochrysidales	Sarcinochrysidales_fa	Sarcinochrysis
18SASV_725	Eukaryota	Cercozoa	Granofilosea	Granofilosea_or	Granofilosea_fa	Massisteria
18SASV_726	Eukaryota	Annelida	Polychaeta	Phyllodocida	NA	NA
18SASV_727	Eukaryota	Ciliophora	Intramacronucleata	Spirotrichea	Oligotrichia	NA
18SASV_728	Eukaryota	Dinoflagellata	Dinophyceae	NA	NA	NA
18SASV_729	Eukaryota	Protalveolata	Syndiniales	Syndiniales_or	Syndiniales_fa	Amoebophrya
18SASV_730	Eukaryota	NA	NA	NA	NA	NA
18SASV_731	Eukaryota	Dinoflagellata	Dinophyceae	Gymnodiniphycidae	Gymnodiniphycidae_fa	Gyrodinium
18SASV_732	Eukaryota	Cercozoa	NA	NA	NA	NA
18SASV_733	Eukaryota	Dinoflagellata	Dinophyceae	Peridiniphycidae	NA	NA
18SASV_734	Eukaryota	Cercozoa	Granofilosea	Granofilosea_or	Granofilosea_fa	Massisteria
18SASV_735	Eukaryota	Ochrophyta	Diatomea	Bacillariophytina	Mediophyceae	Odontella
18SASV_736	Eukaryota	Cercozoa	Thecofilosea	Cryomonadida	Rhizaspididae	Rhogostoma
18SASV_737	Eukaryota	Cercozoa	Thecofilosea	Cryomonadida	Rhizaspididae	Rhogostoma
18SASV_738	Eukaryota	Ochrophyta	Diatomea	Coscinodiscophytina	Fragilariales	Grammonema
18SASV_739	Eukaryota	Protalveolata	Syndiniales	Syndiniales_or	Syndiniales_Group_II	NA
18SASV_740	Eukaryota	NA	NA	NA	NA	NA
18SASV_741	Eukaryota	NA	NA	NA	NA	NA
18SASV_742	Eukaryota	NA	NA	NA	NA	NA
18SASV_743	Eukaryota	Ciliophora	Intramacronucleata	Conthreep	Oligohymenophorea	Homalogastra
18SASV_744	Eukaryota	Ciliophora	Intramacronucleata	Spirotrichea	Choreotrichia	Tintinnopsis
18SASV_745	Eukaryota	Prymnesiophyceae	Prymnesiophyceae_cl	Prymnesiophyceae_or	Prymnesiophyceae_fa	Phaeocystis
18SASV_746	Eukaryota	Ochrophyta	Dictyochophyceae	Pedinellales	Pedinellales_fa	Pteridomonas
18SASV_747	Eukaryota	Incertae_Sedis_ph	Incertae_Sedis_cl	Incertae_Sedis_or	Incertae_Sedis_fa	Telonema
18SASV_748	Eukaryota	Cercozoa	NA	NA	NA	NA
18SASV_749	Eukaryota	Dinoflagellata	Dinophyceae	Peridiniphycidae	NA	NA
18SASV_750	Eukaryota	Dinoflagellata	Dinophyceae	Peridiniphycidae	Peridiniales	Islandinium
18SASV_751	Eukaryota	Ochrophyta	Diatomea	Bacillariophytina	Mediophyceae	NA
18SASV_752	Eukaryota	Ochrophyta	Diatomea	Bacillariophytina	Mediophyceae	NA
18SASV_753	Eukaryota	Dinoflagellata	Dinophyceae	NA	NA	NA
18SASV_754	Eukaryota	Cryptomonadales	Cryptomonadales_cl	Cryptomonadales_or	Cryptomonadales_fa	Geminigera
18SASV_755	Eukaryota	Arthropoda	Maxillopoda	Calanoida	NA	NA
18SASV_756	Eukaryota	Ochrophyta	Diatomea	NA	NA	NA
18SASV_757	Eukaryota	Dinoflagellata	Dinophyceae	Dinophysiales	Dinophysiales_fa	Phalacroma
18SASV_758	Eukaryota	Ciliophora	Intramacronucleata	Conthreep	Oligohymenophorea	Homalogastra
18SASV_759	Eukaryota	Chlorophyta_ph	Mamiellophyceae	Mamiellophyceae_or	Mamiellophyceae_fa	Dolichomastix
18SASV_760	Eukaryota	Ochrophyta	Diatomea	Coscinodiscophytina	NA	NA
18SASV_761	Eukaryota	Prymnesiophyceae	Prymnesiophyceae_cl	Prymnesiophyceae_or	Prymnesiophyceae_fa	Phaeocystis
18SASV_762	Eukaryota	Dinoflagellata	Dinophyceae	Gymnodiniphycidae	Gymnodinium_clade	Paragymnodinium
18SASV_763	Eukaryota	Dinoflagellata	Dinophyceae	NA	NA	NA
18SASV_764	Eukaryota	NA	NA	NA	NA	NA
18SASV_765	Eukaryota	Protalveolata	Syndiniales	Syndiniales_or	Syndiniales_fa	Amoebophrya
18SASV_766	Eukaryota	Ochrophyta	MOCH-2	NA	NA	NA
18SASV_767	Eukaryota	NA	NA	NA	NA	NA
18SASV_768	Eukaryota	Cercozoa	Imbricatea	Marimonadida	Marimonadida_fa	Pseudopirsonia
18SASV_769	Eukaryota	Dinoflagellata	Dinophyceae	Peridiniphycidae	Gonyaulacales	Azadinium
18SASV_770	Eukaryota	Protalveolata	Syndiniales	Syndiniales_or	Syndiniales_Group_II	NA
18SASV_771	Eukaryota	Ochrophyta	Chrysophyceae	NA	NA	NA
18SASV_772	Eukaryota	Arthropoda	Maxillopoda	Calanoida	NA	NA
18SASV_773	Eukaryota	NA	NA	NA	NA	NA
18SASV_774	Eukaryota	Protalveolata	Syndiniales	Syndiniales_or	Syndiniales_Group_I	NA
18SASV_775	Eukaryota	Incertae_Sedis	Incertae_Sedis_cl	Incertae_Sedis_or	Incertae_Sedis_fa	Pirsonia
18SASV_776	Eukaryota	Cryptomonadales	Cryptomonadales_cl	Cryptomonadales_or	Cryptomonadales_fa	Geminigera
18SASV_777	Eukaryota	Dinoflagellata	Dinophyceae	NA	NA	NA
18SASV_778	Eukaryota	Protalveolata	Syndiniales	Syndiniales_or	Syndiniales_fa	Amoebophrya
18SASV_779	Eukaryota	Ochrophyta	Dictyochophyceae	Pedinellales	Pedinellales_fa	Pedinella
18SASV_780	Eukaryota	Ochrophyta	Chrysophyceae	Ochromonadales	Ochromonadales_fa	Paraphysomonas
18SASV_781	Eukaryota	Prymnesiophyceae	Prymnesiales	NA	NA	NA
18SASV_782	Eukaryota	NA	NA	NA	NA	NA
18SASV_783	Eukaryota	Dinoflagellata	Dinophyceae	Gymnodiniphycidae	Kareniaceae	Karlodinium
18SASV_784	Eukaryota	Arthropoda	Maxillopoda	Calanoida	NA	NA
18SASV_785	Eukaryota	Cercozoa	Imbricatea	Marimonadida	Marimonadida_fa	Pseudopirsonia
18SASV_786	Eukaryota	Dinoflagellata	Dinophyceae	Dinophysiales	Dinophysiales_fa	Sinophysis
18SASV_787	Eukaryota	Ochrophyta	Diatomea	Bacillariophytina	Mediophyceae	NA
18SASV_788	Eukaryota	Chlorophyta_ph	NA	NA	NA	NA
18SASV_789	Eukaryota	Dinoflagellata	Dinophyceae	Peridiniphycidae	Gonyaulacales	NA
18SASV_790	Eukaryota	Chlorophyta_ph	Prasinophytae	Pyramimonadales	Pyramimonadales_fa	Pterosperma
18SASV_791	Eukaryota	Ochrophyta	Diatomea	Bacillariophytina	Mediophyceae	Odontella
18SASV_792	Eukaryota	Protalveolata	Syndiniales	Syndiniales_or	Syndiniales_Group_II	NA
18SASV_793	Eukaryota	Choanoflagellida	Acanthoecida	Stephanoecidae	Stephanoecidae_fa	Marine_Choanoflagellates_1
18SASV_794	Eukaryota	Cercozoa	Imbricatea	Marimonadida	Marimonadida_fa	Pseudopirsonia
18SASV_795	Eukaryota	NA	NA	NA	NA	NA
18SASV_796	Eukaryota	Cercozoa	NA	NA	NA	NA
18SASV_797	Eukaryota	Ciliophora	Intramacronucleata	Conthreep	Phyllopharyngea	Ephelota
18SASV_798	Eukaryota	Labyrinthulomycetes	NA	NA	NA	NA
18SASV_799	Eukaryota	Protalveolata	Syndiniales	Syndiniales_or	Syndiniales_Group_II	NA
18SASV_800	Eukaryota	Cercozoa	Imbricatea	Marimonadida	Marimonadida_fa	Pseudopirsonia
18SASV_801	Eukaryota	Protalveolata	Syndiniales	Syndiniales_or	Syndiniales_Group_II	NA
18SASV_802	Eukaryota	NA	NA	NA	NA	NA
18SASV_803	Eukaryota	Cercozoa	NA	NA	NA	NA
18SASV_804	Eukaryota	Annelida	Polychaeta	NA	NA	NA
18SASV_805	Eukaryota	Protalveolata	Syndiniales	Syndiniales_or	Syndiniales_fa	Amoebophrya
18SASV_806	Eukaryota	NA	NA	NA	NA	NA
18SASV_807	Eukaryota	Dinoflagellata	Dinophyceae	NA	NA	NA
18SASV_808	Eukaryota	Chlorophyta_ph	Prasinophytae	NA	NA	NA
18SASV_809	Eukaryota	Cercozoa	Thecofilosea	Cryomonadida	Rhizaspididae	Rhogostoma
18SASV_810	Eukaryota	NA	NA	NA	NA	NA
18SASV_811	Eukaryota	Cercozoa	Granofilosea	Granofilosea_or	Granofilosea_fa	Massisteria
18SASV_812	Eukaryota	Ochrophyta	Dictyochophyceae	Pedinellales	NA	NA
18SASV_813	Eukaryota	NA	NA	NA	NA	NA
18SASV_814	Eukaryota	NA	NA	NA	NA	NA
18SASV_815	Eukaryota	Ochrophyta	Diatomea	Bacillariophytina	Mediophyceae	NA
18SASV_816	Eukaryota	Ciliophora	Intramacronucleata	Spirotrichea	Oligotrichia	Spirotontonia
18SASV_817	Eukaryota	Dinoflagellata	Dinophyceae	Peridiniphycidae	Gonyaulacales	NA
18SASV_818	Eukaryota	Cercozoa	NA	NA	NA	NA
18SASV_819	Eukaryota	Ochrophyta	Dictyochophyceae	Pedinellales	Pedinellales_fa	Pteridomonas
18SASV_820	Eukaryota	Cercozoa	NA	NA	NA	NA
18SASV_821	Eukaryota	Chlorophyta_ph	Mamiellophyceae	Mamiellophyceae_or	Mamiellophyceae_fa	Dolichomastix
18SASV_822	Eukaryota	Dinoflagellata	Dinophyceae	Gymnodiniphycidae	Gymnodiniphycidae_fa	Gyrodinium
18SASV_823	Eukaryota	Ciliophora	Intramacronucleata	Spirotrichea	Choreotrichia	Rimostrombidium
18SASV_824	Eukaryota	Dinoflagellata	Dinophyceae	NA	NA	NA
18SASV_825	Eukaryota	NA	NA	NA	NA	NA
18SASV_826	Eukaryota	Ciliophora	Intramacronucleata	Conthreep	Oligohymenophorea	Homalogastra
18SASV_827	Eukaryota	Ochrophyta	Diatomea	Bacillariophytina	Mediophyceae	NA
18SASV_828	Eukaryota	Ochrophyta	Diatomea	Bacillariophytina	Mediophyceae	Chaetoceros
18SASV_829	Eukaryota	Protalveolata	Syndiniales	Syndiniales_or	Syndiniales_fa	Amoebophrya
18SASV_830	Eukaryota	Dinoflagellata	Dinophyceae	Dinophysiales	Dinophysiales_fa	Phalacroma
18SASV_831	Eukaryota	NA	NA	NA	NA	NA
18SASV_832	Eukaryota	Cercozoa	Granofilosea	Granofilosea_or	Granofilosea_fa	Massisteria
18SASV_833	Eukaryota	Ochrophyta	Dictyochophyceae	Florenciellales	Florenciellales_fa	Pseudochattonella
18SASV_834	Eukaryota	Dinoflagellata	Dinophyceae	Gymnodiniphycidae	Gymnodinium_clade	Gymnodinium
18SASV_835	Eukaryota	Protalveolata	Syndiniales	Syndiniales_or	Syndiniales_fa	Amoebophrya
18SASV_836	Eukaryota	Dinoflagellata	Dinophyceae	Gymnodiniphycidae	Gymnodinium_clade	NA
18SASV_837	Eukaryota	Protalveolata	Syndiniales	Syndiniales_or	Syndiniales_Group_I	NA
18SASV_838	Eukaryota	Prymnesiophyceae	Prymnesiophyceae_cl	Prymnesiophyceae_or	Prymnesiophyceae_fa	Phaeocystis
18SASV_839	Eukaryota	Incertae_Sedis_ph	Incertae_Sedis_cl	Incertae_Sedis_or	Incertae_Sedis_fa	Telonema
18SASV_840	Eukaryota	Chlorophyta_ph	Mamiellophyceae	Mamiellales	Mamiellales_fa	NA
18SASV_841	Eukaryota	Protalveolata	Syndiniales	Syndiniales_or	Syndiniales_fa	Amoebophrya
18SASV_842	Eukaryota	Cercozoa	NA	NA	NA	NA
18SASV_843	Eukaryota	Protalveolata	Syndiniales	Syndiniales_or	Syndiniales_Group_II	NA
18SASV_844	Eukaryota	Protalveolata	Syndiniales	Syndiniales_or	Syndiniales_fa	Amoebophrya
18SASV_845	Eukaryota	Dinoflagellata	Dinophyceae	NA	NA	NA
18SASV_846	Eukaryota	Ochrophyta	Dictyochophyceae	Pedinellales	Pedinellales_fa	Pedinella
18SASV_847	Eukaryota	Cryptomonadales	Cryptomonadales_cl	Cryptomonadales_or	Cryptomonadales_fa	Geminigera
18SASV_848	Eukaryota	Cercozoa	Thecofilosea	Cryomonadida	Rhizaspididae	Rhogostoma
18SASV_849	Eukaryota	Ciliophora	Intramacronucleata	NA	NA	NA
18SASV_850	Eukaryota	Protalveolata	Syndiniales	Syndiniales_or	Syndiniales_Group_II	NA
18SASV_851	Eukaryota	Cercozoa	Thecofilosea	Cryomonadida	Rhizaspididae	Rhogostoma
18SASV_852	Eukaryota	Ciliophora	Intramacronucleata	Spirotrichea	Hypotrichia	Uronychia
18SASV_853	Eukaryota	Ciliophora	Intramacronucleata	Conthreep	NA	NA
18SASV_854	Eukaryota	Cryptomonadales	Cryptomonadales_cl	Cryptomonadales_or	Cryptomonadales_fa	Geminigera
18SASV_855	Eukaryota	Ochrophyta	Diatomea	Bacillariophytina	Mediophyceae	NA
18SASV_856	Eukaryota	Ciliophora	Intramacronucleata	Conthreep	Oligohymenophorea	Stokesia
18SASV_857	Eukaryota	Chlorophyta_ph	Mamiellophyceae	Mamiellales	Mamiellales_fa	Mamiella
18SASV_858	Eukaryota	Ochrophyta	Diatomea	Bacillariophytina	Mediophyceae	Odontella
18SASV_859	Eukaryota	Protalveolata	Syndiniales	Syndiniales_or	Syndiniales_Group_II	NA
18SASV_860	Eukaryota	Ciliophora	Intramacronucleata	Conthreep	Prostomatea	Cryptocaryon
18SASV_861	Eukaryota	Cercozoa	NA	NA	NA	NA
18SASV_862	Eukaryota	Cercozoa	Thecofilosea	Cryomonadida	Rhizaspididae	Rhogostoma
18SASV_863	Eukaryota	Ciliophora	Intramacronucleata	Spirotrichea	NA	NA
18SASV_864	Eukaryota	Cercozoa	NA	NA	NA	NA
18SASV_865	Eukaryota	Chlorophyta_ph	Trebouxiophyceae	Incertae_Sedis	Incertae_Sedis_fa	Picochlorum
18SASV_866	Eukaryota	Labyrinthulomycetes	NA	NA	NA	NA
18SASV_867	Eukaryota	Ciliophora	Intramacronucleata	Conthreep	NA	NA
18SASV_868	Eukaryota	Cercozoa	NA	NA	NA	NA
18SASV_869	Eukaryota	Dinoflagellata	Dinophyceae	NA	NA	NA
18SASV_870	Eukaryota	Chlorophyta_ph	Mamiellophyceae	Mamiellales	Mamiellales_fa	Mamiella
18SASV_871	Eukaryota	Cryptomonadales	Cryptomonadales_cl	Cryptomonadales_or	Cryptomonadales_fa	Geminigera
18SASV_872	Eukaryota	Protalveolata	Syndiniales	Syndiniales_or	Syndiniales_Group_I	NA
18SASV_873	Eukaryota	MAST-3	MAST-3F	NA	NA	NA
18SASV_874	Eukaryota	Picozoa	Picomonadida	Picomonadidae	Picomonadidae_fa	Picomonas
18SASV_875	Eukaryota	Ochrophyta	Chrysophyceae	NA	NA	NA
18SASV_876	Eukaryota	Ochrophyta	Diatomea	Bacillariophytina	Mediophyceae	Thalassiosira
18SASV_877	Eukaryota	Cercozoa	NA	NA	NA	NA
18SASV_878	Eukaryota	Protalveolata	Syndiniales	Syndiniales_or	Syndiniales_Group_II	NA
18SASV_879	Eukaryota	Protalveolata	Syndiniales	Syndiniales_or	Syndiniales_Group_III	NA
18SASV_880	Eukaryota	Dinoflagellata	Dinophyceae	Peridiniphycidae	Peridiniales	Heterocapsa
18SASV_881	Eukaryota	Protalveolata	Syndiniales	Syndiniales_or	Syndiniales_Group_II	NA
18SASV_882	Eukaryota	Protalveolata	Syndiniales	Syndiniales_or	Syndiniales_Group_II	NA
18SASV_883	Eukaryota	Protalveolata	Syndiniales	Syndiniales_or	Syndiniales_Group_II	NA
18SASV_884	Eukaryota	Dinoflagellata	Dinophyceae	Gymnodiniphycidae	Gymnodinium_clade	Gymnodinium
18SASV_885	Eukaryota	Cryptomonadales	Cryptomonadales_cl	Cryptomonadales_or	Cryptomonadales_fa	Geminigera
18SASV_886	Eukaryota	Protalveolata	Syndiniales	Syndiniales_or	Syndiniales_fa	Amoebophrya
18SASV_887	Eukaryota	NA	NA	NA	NA	NA
18SASV_888	Eukaryota	Ochrophyta	Diatomea	Bacillariophytina	Mediophyceae	Odontella
18SASV_889	Eukaryota	Cercozoa	NA	NA	NA	NA
18SASV_890	Eukaryota	Protalveolata	Syndiniales	Syndiniales_or	Syndiniales_Group_II	NA
18SASV_891	Eukaryota	Dinoflagellata	Dinophyceae	NA	NA	NA
18SASV_892	Eukaryota	Cercozoa	NA	NA	NA	NA
18SASV_893	Eukaryota	Cercozoa	NA	NA	NA	NA
18SASV_894	Eukaryota	Protalveolata	Syndiniales	Syndiniales_or	Syndiniales_fa	Amoebophrya
18SASV_895	Eukaryota	Cercozoa	Granofilosea	Granofilosea_or	Granofilosea_fa	Massisteria
18SASV_896	Eukaryota	Cercozoa	Granofilosea	Granofilosea_or	Granofilosea_fa	Massisteria
18SASV_897	Eukaryota	Annelida	Polychaeta	Phyllodocida	NA	NA
18SASV_898	Eukaryota	Dinoflagellata	Dinophyceae	Peridiniphycidae	Peridiniales	Amphidiniopsis
18SASV_899	Eukaryota	Ochrophyta	Diatomea	Bacillariophytina	Bacillariophyceae	Fragilariopsis
18SASV_900	Eukaryota	NA	NA	NA	NA	NA
18SASV_901	Eukaryota	Cercozoa	Thecofilosea	Cryomonadida	Rhizaspididae	Rhogostoma
18SASV_902	Eukaryota	Dinoflagellata	Dinophyceae	Gymnodiniphycidae	Kareniaceae	NA
18SASV_903	Eukaryota	NA	NA	NA	NA	NA
18SASV_904	Eukaryota	Protalveolata	Syndiniales	Syndiniales_or	Syndiniales_fa	Amoebophrya
18SASV_905	Eukaryota	Chlorophyta_ph	Prasinophytae	Pyramimonadales	Pyramimonadales_fa	NA
18SASV_906	Eukaryota	NA	NA	NA	NA	NA
18SASV_907	Eukaryota	Incertae_Sedis_ph	Incertae_Sedis_cl	Incertae_Sedis_or	Incertae_Sedis_fa	Telonema
18SASV_908	Eukaryota	Ochrophyta	Diatomea	Bacillariophytina	Mediophyceae	NA
18SASV_909	Eukaryota	Ciliophora	Intramacronucleata	Conthreep	Prostomatea	Cryptocaryon
18SASV_910	Eukaryota	Cryptomonadales	Cryptomonadales_cl	Cryptomonadales_or	Cryptomonadales_fa	Geminigera
18SASV_911	Eukaryota	Protalveolata	Syndiniales	Syndiniales_or	Syndiniales_fa	Amoebophrya
18SASV_912	Eukaryota	Ochrophyta	Diatomea	Coscinodiscophytina	NA	NA
18SASV_913	Eukaryota	Cryptomonadales	Cryptomonadales_cl	Cryptomonadales_or	Cryptomonadales_fa	Geminigera
18SASV_914	Eukaryota	Dinoflagellata	Dinophyceae	NA	NA	NA
18SASV_915	Eukaryota	Ochrophyta	Dictyochophyceae	Pedinellales	Pedinellales_fa	Pedinella
18SASV_916	Eukaryota	Dinoflagellata	Dinophyceae	NA	NA	NA
18SASV_917	Eukaryota	Cercozoa	Imbricatea	Marimonadida	Marimonadida_fa	Pseudopirsonia
18SASV_918	Eukaryota	Cercozoa	Granofilosea	Granofilosea_or	Granofilosea_fa	Massisteria
18SASV_919	Eukaryota	Cercozoa	Incertae_Sedis	Incertae_Sedis_or	Incertae_Sedis_fa	Gymnophrys
18SASV_920	Eukaryota	NA	NA	NA	NA	NA
18SASV_921	Eukaryota	Arthropoda	Maxillopoda	Cyclopoida	NA	NA
18SASV_922	Eukaryota	Cercozoa	Thecofilosea	Cryomonadida	Rhizaspididae	Rhogostoma
18SASV_923	Eukaryota	Ochrophyta	Diatomea	Bacillariophytina	Mediophyceae	Odontella
18SASV_924	Eukaryota	Picozoa	Picomonadida	Picomonadidae	Picomonadidae_fa	Picomonas
18SASV_925	Eukaryota	NA	NA	NA	NA	NA
18SASV_926	Eukaryota	Ochrophyta	Pelagophyceae	Sarcinochrysidales	Sarcinochrysidales_fa	SS1-E01-69
18SASV_927	Eukaryota	Dinoflagellata	Dinophyceae	NA	NA	NA
18SASV_928	Eukaryota	Ochrophyta	Phaeophyceae	NA	NA	NA
18SASV_929	Eukaryota	Dinoflagellata	Dinophyceae	Gymnodiniphycidae	NA	NA
18SASV_930	Eukaryota	Ciliophora	Intramacronucleata	Spirotrichea	Oligotrichia	Spirostrombidium
18SASV_931	Eukaryota	Ochrophyta	Diatomea	Coscinodiscophytina	NA	NA
18SASV_932	Eukaryota	Chlorophyta_ph	Mamiellophyceae	NA	NA	NA
18SASV_933	Eukaryota	Protalveolata	NA	NA	NA	NA
18SASV_934	Eukaryota	Cryptomonadales	Cryptomonadales_cl	Cryptomonadales_or	Cryptomonadales_fa	Geminigera
18SASV_935	Eukaryota	Vertebrata	Mammalia	NA	NA	NA
18SASV_936	Eukaryota	Ochrophyta	Ochrophyta_cl	Ochrophyta_or	Ochrophyta_fa	Bolidomonas
18SASV_937	Eukaryota	Protalveolata	Syndiniales	Syndiniales_or	Syndiniales_fa	Amoebophrya
18SASV_938	Eukaryota	Incertae_Sedis	NA	NA	NA	NA
18SASV_939	Eukaryota	Prymnesiophyceae	Prymnesiales	Prymnesiales_or	Prymnesiales_fa	Chrysochromulina
18SASV_940	Eukaryota	NA	NA	NA	NA	NA
18SASV_941	Eukaryota	NA	NA	NA	NA	NA
18SASV_942	Eukaryota	NA	NA	NA	NA	NA
18SASV_943	Eukaryota	Ciliophora	Intramacronucleata	Conthreep	Phyllopharyngea	NA
18SASV_944	Eukaryota	Cercozoa	NA	NA	NA	NA
18SASV_945	Eukaryota	Cercozoa	Granofilosea	Granofilosea_or	Granofilosea_fa	Massisteria
18SASV_946	Eukaryota	Choanoflagellida	Acanthoecida	Stephanoecidae	Stephanoecidae_fa	NA
18SASV_947	Eukaryota	Protalveolata	Syndiniales	Syndiniales_or	Syndiniales_fa	Amoebophrya
18SASV_948	Eukaryota	Dinoflagellata	Dinophyceae	Peridiniphycidae	NA	NA
18SASV_949	Eukaryota	Ochrophyta	Pelagophyceae	Sarcinochrysidales	Sarcinochrysidales_fa	SS1-E01-69
18SASV_950	Eukaryota	Cryptomonadales	Cryptomonadales_cl	Cryptomonadales_or	Cryptomonadales_fa	Geminigera
18SASV_951	Eukaryota	Ciliophora	Intramacronucleata	Spirotrichea	NA	NA
18SASV_952	Eukaryota	Cercozoa	Thecofilosea	Cryomonadida	Rhizaspididae	Rhogostoma
18SASV_953	Eukaryota	Protalveolata	Syndiniales	Syndiniales_or	Syndiniales_fa	Amoebophrya
18SASV_954	Eukaryota	Cercozoa	Imbricatea	Marimonadida	Marimonadida_fa	Pseudopirsonia
18SASV_955	Eukaryota	Cercozoa	Imbricatea	Marimonadida	Marimonadida_fa	Pseudopirsonia
18SASV_956	Eukaryota	Protalveolata	Syndiniales	Syndiniales_or	Syndiniales_Group_II	NA
18SASV_957	Eukaryota	Cryptomonadales	Cryptomonadales_cl	Cryptomonadales_or	Cryptomonadales_fa	Geminigera
18SASV_958	Eukaryota	Prymnesiophyceae	Prymnesiales	Prymnesiales_or	Prymnesiales_fa	Haptolina
18SASV_959	Eukaryota	Ciliophora	Intramacronucleata	Conthreep	NA	NA
18SASV_960	Eukaryota	Dinoflagellata	Dinophyceae	Gymnodiniphycidae	NA	NA
18SASV_961	Eukaryota	Prymnesiophyceae	Prymnesiophyceae_cl	Prymnesiophyceae_or	Prymnesiophyceae_fa	Phaeocystis
18SASV_962	Eukaryota	Protalveolata	Syndiniales	Syndiniales_or	Syndiniales_Group_II	NA
18SASV_963	Eukaryota	Protalveolata	Syndiniales	Syndiniales_or	Syndiniales_Group_II	NA
18SASV_964	Eukaryota	Chlorophyta_ph	Ulvophyceae	NA	NA	NA
18SASV_965	Eukaryota	Echinodermata	Ophiuroidea	NA	NA	NA
18SASV_966	Eukaryota	Protalveolata	Syndiniales	Syndiniales_or	Syndiniales_fa	Amoebophrya
18SASV_967	Eukaryota	Ochrophyta	Diatomea	Bacillariophytina	Bacillariophyceae	Cylindrotheca
18SASV_968	Eukaryota	Dinoflagellata	NA	NA	NA	NA
18SASV_969	Eukaryota	Protalveolata	Syndiniales	Syndiniales_or	Syndiniales_fa	Amoebophrya
18SASV_970	Eukaryota	Protalveolata	Syndiniales	Syndiniales_or	Syndiniales_fa	Amoebophrya
18SASV_971	Eukaryota	Prymnesiophyceae	Prymnesiales	Prymnesiales_or	Prymnesiales_fa	OLI51059
18SASV_972	Eukaryota	Ochrophyta	Chrysophyceae	NA	NA	NA
18SASV_973	Eukaryota	NA	NA	NA	NA	NA
18SASV_974	Eukaryota	Ciliophora	Intramacronucleata	Conthreep	Phyllopharyngea	NA
18SASV_975	Eukaryota	Ciliophora	Intramacronucleata	Conthreep	Prostomatea	Cryptocaryon
18SASV_976	Eukaryota	Cercozoa	Imbricatea	Marimonadida	Marimonadida_fa	Pseudopirsonia
18SASV_977	Eukaryota	Dinoflagellata	Dinophyceae	Peridiniphycidae	Gonyaulacales	Azadinium
18SASV_978	Eukaryota	Prymnesiophyceae	Prymnesiophyceae_cl	Prymnesiophyceae_or	Prymnesiophyceae_fa	Phaeocystis
18SASV_979	Eukaryota	Dinoflagellata	Dinophyceae	Gymnodiniphycidae	Suessiaceae	NA
18SASV_980	Eukaryota	Ochrophyta	Diatomea	Bacillariophytina	Mediophyceae	NA
18SASV_981	Eukaryota	Dinoflagellata	Dinophyceae	Peridiniphycidae	Gonyaulacales	Azadinium
18SASV_982	Eukaryota	Cercozoa	NA	NA	NA	NA
18SASV_983	Eukaryota	Cercozoa	NA	NA	NA	NA
18SASV_984	Eukaryota	Ciliophora	Intramacronucleata	Conthreep	Phyllopharyngea	Pithites
18SASV_985	Eukaryota	Chlorophyta_ph	Mamiellophyceae	Mamiellales	Mamiellales_fa	Mamiella
18SASV_986	Eukaryota	Ochrophyta	Diatomea	Bacillariophytina	Mediophyceae	NA
18SASV_987	Eukaryota	Protalveolata	Syndiniales	Syndiniales_or	Syndiniales_fa	Amoebophrya
18SASV_988	Eukaryota	Protalveolata	Syndiniales	Syndiniales_or	Syndiniales_fa	Amoebophrya
18SASV_989	Eukaryota	Cryptomonadales	Cryptomonadales_cl	Cryptomonadales_or	Cryptomonadales_fa	Geminigera
18SASV_990	Eukaryota	Ochrophyta	NA	NA	NA	NA
18SASV_991	Eukaryota	Ochrophyta	Diatomea	Bacillariophytina	Mediophyceae	Chaetoceros
18SASV_992	Eukaryota	Cryptomonadales	Cryptomonadales_cl	Cryptomonadales_or	Cryptomonadales_fa	Geminigera
18SASV_993	Eukaryota	Cryptomonadales	Cryptomonadales_cl	Cryptomonadales_or	Cryptomonadales_fa	Geminigera
18SASV_994	Eukaryota	Cryptomonadales	Cryptomonadales_cl	Cryptomonadales_or	Cryptomonadales_fa	Geminigera
18SASV_995	Eukaryota	Incertae_Sedis_ph	Incertae_Sedis_cl	Incertae_Sedis_or	Incertae_Sedis_fa	Telonema
18SASV_996	Eukaryota	Cryptomonadales	Cryptomonadales_cl	Cryptomonadales_or	Cryptomonadales_fa	Geminigera
18SASV_997	Eukaryota	Protalveolata	Syndiniales	Syndiniales_or	Syndiniales_Group_II	NA
18SASV_998	Eukaryota	Cercozoa	Thecofilosea	Cryomonadida	Rhizaspididae	Rhogostoma
18SASV_999	Eukaryota	Protalveolata	Syndiniales	Syndiniales_or	Syndiniales_Group_II	NA
18SASV_1000	Eukaryota	Cercozoa	Thecofilosea	Cryomonadida	Rhizaspididae	Rhogostoma
18SASV_1001	Eukaryota	Cryptomonadales	Cryptomonadales_cl	Cryptomonadales_or	Cryptomonadales_fa	Geminigera
18SASV_1002	Eukaryota	Ochrophyta	Pelagophyceae	Sarcinochrysidales	Sarcinochrysidales_fa	SS1-E01-69
18SASV_1003	Eukaryota	Prymnesiophyceae	Prymnesiophyceae_cl	Prymnesiophyceae_or	Prymnesiophyceae_fa	Phaeocystis
18SASV_1004	Eukaryota	Chlorophyta_ph	Mamiellophyceae	Mamiellales	Mamiellales_fa	Mamiella
18SASV_1005	Eukaryota	Ochrophyta	Chrysophyceae	Ochromonadales	Ochromonadales_fa	Paraphysomonas
18SASV_1006	Eukaryota	Cryptomonadales	Cryptomonadales_cl	Cryptomonadales_or	Cryptomonadales_fa	Geminigera
18SASV_1007	Eukaryota	Ochrophyta	Diatomea	Bacillariophytina	Mediophyceae	Chaetoceros
18SASV_1008	Eukaryota	NA	NA	NA	NA	NA
18SASV_1009	Eukaryota	Ochrophyta	Diatomea	Bacillariophytina	Mediophyceae	Odontella
18SASV_1010	Eukaryota	Dinoflagellata	Dinophyceae	Gymnodiniphycidae	Gymnodiniphycidae_fa	Gyrodinium
18SASV_1011	Eukaryota	NA	NA	NA	NA	NA
18SASV_1012	Eukaryota	Cryptomonadales	Cryptomonadales_cl	Cryptomonadales_or	Cryptomonadales_fa	Geminigera
18SASV_1013	Eukaryota	Cercozoa	NA	NA	NA	NA
18SASV_1014	Eukaryota	NA	NA	NA	NA	NA
18SASV_1015	Eukaryota	Ochrophyta	Dictyochophyceae	Pedinellales	NA	NA
18SASV_1016	Eukaryota	Dinoflagellata	Dinophyceae	Gymnodiniphycidae	NA	NA
18SASV_1017	Eukaryota	Protalveolata	Syndiniales	Syndiniales_or	Syndiniales_Group_II	NA
18SASV_1018	Eukaryota	Ochrophyta	Dictyochophyceae	Pedinellales	NA	NA
18SASV_1019	Eukaryota	Chytridiomycota	Incertae_Sedis	Rhizophydiales	NA	NA
18SASV_1020	Eukaryota	Dinoflagellata	Dinophyceae	Peridiniphycidae	NA	NA
18SASV_1021	Eukaryota	Ochrophyta	Diatomea	Coscinodiscophytina	Coscinodiscophytina_fa	Coscinodiscus
18SASV_1022	Eukaryota	Ciliophora	Intramacronucleata	Conthreep	Phyllopharyngea	NA
18SASV_1023	Eukaryota	Ochrophyta	Diatomea	Bacillariophytina	Mediophyceae	NA
18SASV_1024	Eukaryota	Cercozoa	NA	NA	NA	NA
18SASV_1025	Eukaryota	Incertae_Sedis	NA	NA	NA	NA
18SASV_1026	Eukaryota	Dinoflagellata	Dinophyceae	Gymnodiniphycidae	Gymnodiniphycidae_fa	Gyrodinium
18SASV_1027	Eukaryota	Cryptomonadales	NA	NA	NA	NA
18SASV_1028	Eukaryota	Dinoflagellata	Dinophyceae	NA	NA	NA
18SASV_1029	Eukaryota	Chlorophyta_ph	Ulvophyceae	NA	NA	NA
18SASV_1030	Eukaryota	Labyrinthulomycetes	NA	NA	NA	NA
18SASV_1031	Eukaryota	Ochrophyta	Diatomea	Bacillariophytina	Mediophyceae	NA
18SASV_1032	Eukaryota	Protalveolata	Syndiniales	Syndiniales_or	Syndiniales_Group_II	NA
18SASV_1033	Eukaryota	Dinoflagellata	Dinophyceae	Gymnodiniphycidae	Gymnodinium_clade	Gymnodinium
18SASV_1034	Eukaryota	Protalveolata	Syndiniales	Syndiniales_or	Syndiniales_fa	Amoebophrya
18SASV_1035	Eukaryota	Cryptomonadales	Cryptomonadales_cl	Cryptomonadales_or	Cryptomonadales_fa	Geminigera
18SASV_1036	Eukaryota	Protalveolata	Syndiniales	Syndiniales_or	Syndiniales_fa	Amoebophrya
18SASV_1037	Eukaryota	Ochrophyta	Ochrophyta_cl	Ochrophyta_or	Ochrophyta_fa	Bolidomonas
18SASV_1038	Eukaryota	Ochrophyta	Diatomea	Coscinodiscophytina	Rhizosolenids	NA
18SASV_1039	Eukaryota	Incertae_Sedis_ph	Incertae_Sedis_cl	Incertae_Sedis_or	Incertae_Sedis_fa	Telonema
18SASV_1040	Eukaryota	Prymnesiophyceae	Prymnesiophyceae_cl	Prymnesiophyceae_or	Prymnesiophyceae_fa	Phaeocystis
18SASV_1041	Eukaryota	Dinoflagellata	Dinophyceae	Gymnodiniphycidae	Gymnodiniphycidae_fa	Gyrodinium
18SASV_1042	Eukaryota	Ochrophyta	Diatomea	Bacillariophytina	Mediophyceae	Odontella
18SASV_1043	Eukaryota	Ciliophora	Intramacronucleata	Conthreep	Oligohymenophorea	Stokesia
18SASV_1044	Eukaryota	Cercozoa	Imbricatea	Marimonadida	Marimonadida_fa	Pseudopirsonia
18SASV_1045	Eukaryota	Tunicata	Thaliacea	Salpida	NA	NA
18SASV_1046	Eukaryota	Ochrophyta	Diatomea	Bacillariophytina	Mediophyceae	Odontella
18SASV_1047	Eukaryota	Ochrophyta	Diatomea	Bacillariophytina	Bacillariophyceae	Fragilariopsis
18SASV_1048	Eukaryota	Ochrophyta	Diatomea	Bacillariophytina	Mediophyceae	NA
18SASV_1049	Eukaryota	Ochrophyta	Diatomea	Bacillariophytina	Mediophyceae	Thalassiosira
18SASV_1050	Eukaryota	Ochrophyta	Diatomea	Bacillariophytina	Bacillariophyceae	Stauroneis
18SASV_1051	Eukaryota	Dinoflagellata	Dinophyceae	Peridiniphycidae	Gonyaulacales	Azadinium
18SASV_1052	Eukaryota	Ochrophyta	Diatomea	Bacillariophytina	Mediophyceae	Chaetoceros
18SASV_1053	Eukaryota	Ochrophyta	Dictyochophyceae	Pedinellales	NA	NA
18SASV_1054	Eukaryota	Cryptomonadales	Cryptomonadales_cl	Cryptomonadales_or	Cryptomonadales_fa	Geminigera
18SASV_1055	Eukaryota	Dinoflagellata	Dinophyceae	Gymnodiniphycidae	Gymnodinium_clade	Gyrodiniellum
18SASV_1056	Eukaryota	Protalveolata	Syndiniales	Syndiniales_or	Syndiniales_fa	Amoebophrya
18SASV_1057	Eukaryota	Labyrinthulomycetes	NA	NA	NA	NA
18SASV_1058	Eukaryota	Choanoflagellida	Acanthoecida	Stephanoecidae	Stephanoecidae_fa	NA
18SASV_1059	Eukaryota	Cryptomonadales	Cryptomonadales_cl	Cryptomonadales_or	Cryptomonadales_fa	Geminigera
18SASV_1060	Eukaryota	Cercozoa	Thecofilosea	Cryomonadida	Rhizaspididae	Rhogostoma
18SASV_1061	Eukaryota	Protalveolata	Syndiniales	Syndiniales_or	Syndiniales_Group_I	NA
18SASV_1062	Eukaryota	MAST-3	MAST-3E	NA	NA	NA
18SASV_1063	Eukaryota	Protalveolata	Syndiniales	Syndiniales_or	Syndiniales_Group_III	NA
18SASV_1064	Eukaryota	Cryptomonadales	Cryptomonadales_cl	Cryptomonadales_or	Cryptomonadales_fa	Geminigera
18SASV_1065	Eukaryota	Dinoflagellata	Dinophyceae	Peridiniphycidae	NA	NA
18SASV_1066	Eukaryota	Protalveolata	Syndiniales	Syndiniales_or	Syndiniales_Group_II	NA
18SASV_1067	Eukaryota	Cercozoa	NA	NA	NA	NA
18SASV_1068	Eukaryota	Ochrophyta	NA	NA	NA	NA
18SASV_1069	Eukaryota	Dinoflagellata	Dinophyceae	Gymnodiniphycidae	NA	NA
18SASV_1070	Eukaryota	Chlorophyta_ph	Ulvophyceae	NA	NA	NA
18SASV_1071	Eukaryota	Ochrophyta	NA	NA	NA	NA
18SASV_1072	Eukaryota	Annelida	Polychaeta	Phyllodocida	NA	NA
18SASV_1073	Eukaryota	Ochrophyta	Diatomea	Bacillariophytina	Bacillariophyceae	Achnanthidium
18SASV_1074	Eukaryota	Florideophycidae	Corallinophycidae	Corallinophycidae_or	Corallinophycidae_fa	Mesophyllum
18SASV_1075	Eukaryota	Dinoflagellata	Dinophyceae	NA	NA	NA
18SASV_1076	Eukaryota	Protalveolata	Syndiniales	Syndiniales_or	Syndiniales_Group_I	NA
18SASV_1077	Eukaryota	Protalveolata	Syndiniales	Syndiniales_or	Syndiniales_Group_I	NA
18SASV_1078	Eukaryota	Protalveolata	Syndiniales	Syndiniales_or	Syndiniales_Group_II	NA
18SASV_1079	Eukaryota	Ochrophyta	Diatomea	Bacillariophytina	Bacillariophyceae	Navicula
18SASV_1080	Eukaryota	Ochrophyta	Diatomea	Bacillariophytina	Bacillariophyceae	Pseudo-nitzschia
18SASV_1081	Eukaryota	Dinoflagellata	Dinophyceae	NA	NA	NA
18SASV_1082	Eukaryota	Dinoflagellata	Dinophyceae	Gymnodiniphycidae	Gymnodiniphycidae_fa	Gyrodinium
18SASV_1083	Eukaryota	Ochrophyta	Diatomea	Bacillariophytina	NA	NA
18SASV_1084	Eukaryota	Dinoflagellata	Dinophyceae	NA	NA	NA
18SASV_1085	Eukaryota	Protalveolata	Syndiniales	Syndiniales_or	Syndiniales_fa	Amoebophrya
18SASV_1086	Eukaryota	Ochrophyta	Diatomea	Coscinodiscophytina	NA	NA
18SASV_1087	Eukaryota	Ochrophyta	Diatomea	Coscinodiscophytina	NA	NA
18SASV_1088	Eukaryota	Dinoflagellata	Dinophyceae	NA	NA	NA
18SASV_1089	Eukaryota	Ciliophora	Intramacronucleata	Conthreep	Prostomatea	Cryptocaryon
18SASV_1090	Eukaryota	Ochrophyta	Diatomea	Coscinodiscophytina	Fragilariales	Thalassionema
18SASV_1091	Eukaryota	Dinoflagellata	Dinophyceae	Gymnodiniphycidae	Gymnodiniphycidae_fa	Gyrodinium
18SASV_1092	Eukaryota	Protalveolata	Syndiniales	Syndiniales_or	Syndiniales_Group_II	NA
18SASV_1093	Eukaryota	Protalveolata	Syndiniales	Syndiniales_or	Syndiniales_Group_II	NA
18SASV_1094	Eukaryota	Ochrophyta	NA	NA	NA	NA
18SASV_1095	Eukaryota	Prymnesiophyceae	Prymnesiophyceae_cl	Prymnesiophyceae_or	Prymnesiophyceae_fa	Phaeocystis
18SASV_1096	Eukaryota	Dinoflagellata	Dinophyceae	NA	NA	NA
18SASV_1097	Eukaryota	Chlorophyta_ph	Mamiellophyceae	NA	NA	NA
18SASV_1098	Eukaryota	Ochrophyta	NA	NA	NA	NA
18SASV_1099	Eukaryota	Protalveolata	Syndiniales	Syndiniales_or	Syndiniales_fa	Amoebophrya
18SASV_1100	Eukaryota	Protalveolata	Syndiniales	Syndiniales_or	Syndiniales_Group_II	NA
18SASV_1101	Eukaryota	NA	NA	NA	NA	NA
18SASV_1102	Eukaryota	Ochrophyta	Diatomea	Bacillariophytina	Bacillariophyceae	Fragilariopsis
18SASV_1103	Eukaryota	Prymnesiophyceae	Prymnesiophyceae_cl	Prymnesiophyceae_or	Prymnesiophyceae_fa	Phaeocystis
18SASV_1104	Eukaryota	NA	NA	NA	NA	NA
18SASV_1105	Eukaryota	Cercozoa	Thecofilosea	Cryomonadida	Rhizaspididae	Rhogostoma
18SASV_1106	Eukaryota	MAST-3	MAST-3B	NA	NA	NA
18SASV_1107	Eukaryota	Dinoflagellata	Dinophyceae	Gymnodiniphycidae	Gymnodiniphycidae_fa	Gyrodinium
18SASV_1108	Eukaryota	Incertae_Sedis	NA	NA	NA	NA
18SASV_1109	Eukaryota	Cercozoa	Chlorarachniophyta	Chlorarachniophyta_or	Chlorarachniophyta_fa	Bigelowiella
18SASV_1110	Eukaryota	NA	NA	NA	NA	NA
18SASV_1111	Eukaryota	Cercozoa	Thecofilosea	Cryomonadida	Rhizaspididae	Rhogostoma
18SASV_1112	Eukaryota	Ochrophyta	Diatomea	Bacillariophytina	Mediophyceae	Discostella
18SASV_1113	Eukaryota	NA	NA	NA	NA	NA
18SASV_1114	Eukaryota	Ochrophyta	Dictyochophyceae	Florenciellales	Florenciellales_fa	Pseudochattonella
18SASV_1115	Eukaryota	Dinoflagellata	Dinophyceae	NA	NA	NA
18SASV_1116	Eukaryota	Ochrophyta	Diatomea	Bacillariophytina	Mediophyceae	NA
18SASV_1117	Eukaryota	Ochrophyta	Diatomea	Bacillariophytina	Mediophyceae	Porosira
18SASV_1118	Eukaryota	Prymnesiophyceae	Prymnesiales	Prymnesiales_or	Prymnesiales_fa	Prymnesium
18SASV_1119	Eukaryota	Incertae_Sedis_ph	Incertae_Sedis_cl	Incertae_Sedis_or	Incertae_Sedis_fa	Telonema
18SASV_1120	Eukaryota	Protalveolata	Syndiniales	Syndiniales_or	Syndiniales_Group_II	NA
18SASV_1121	Eukaryota	Dinoflagellata	Dinophyceae	Gymnodiniphycidae	NA	NA
18SASV_1122	Eukaryota	Cryptomonadales	Cryptomonadales_cl	Cryptomonadales_or	Cryptomonadales_fa	Geminigera
18SASV_1123	Eukaryota	Ochrophyta	Diatomea	Bacillariophytina	Mediophyceae	Chaetoceros
18SASV_1124	Eukaryota	Dinoflagellata	Dinophyceae	NA	NA	NA
18SASV_1125	Eukaryota	Protalveolata	Syndiniales	Syndiniales_or	Syndiniales_fa	Amoebophrya
18SASV_1126	Eukaryota	Ochrophyta	Diatomea	Bacillariophytina	Mediophyceae	NA
18SASV_1127	Eukaryota	Ciliophora	Intramacronucleata	Spirotrichea	Oligotrichia	NA
18SASV_1128	Eukaryota	Protalveolata	Syndiniales	Syndiniales_or	Syndiniales_Group_I	NA
18SASV_1129	Eukaryota	Prymnesiophyceae	Prymnesiophyceae_cl	Prymnesiophyceae_or	Prymnesiophyceae_fa	Phaeocystis
18SASV_1130	Eukaryota	Ochrophyta	Diatomea	Coscinodiscophytina	Rhizosolenids	Guinardia
18SASV_1131	Eukaryota	Ciliophora	Intramacronucleata	Conthreep	Prostomatea	Cryptocaryon
18SASV_1132	Eukaryota	Dinoflagellata	Dinophyceae	Gymnodiniphycidae	Gymnodinium_clade	Gymnodinium
18SASV_1133	Eukaryota	Ciliophora	Intramacronucleata	Spirotrichea	Choreotrichia	NA
18SASV_1134	Eukaryota	Dinoflagellata	Dinophyceae	NA	NA	NA
18SASV_1135	Eukaryota	Dinoflagellata	Dinophyceae	NA	NA	NA
18SASV_1136	Eukaryota	Dinoflagellata	Dinophyceae	NA	NA	NA
18SASV_1137	Eukaryota	Dinoflagellata	Dinophyceae	Peridiniphycidae	NA	NA
18SASV_1138	Eukaryota	Dinoflagellata	Dinophyceae	Peridiniphycidae	NA	NA
18SASV_1139	Eukaryota	NA	NA	NA	NA	NA
18SASV_1140	Eukaryota	Dinoflagellata	Dinophyceae	NA	NA	NA
18SASV_1141	Eukaryota	Dinoflagellata	Dinophyceae	Gymnodiniphycidae	NA	NA
18SASV_1142	Eukaryota	Dinoflagellata	Dinophyceae	NA	NA	NA
18SASV_1143	Eukaryota	Dinoflagellata	Dinophyceae	NA	NA	NA
18SASV_1144	Eukaryota	Cnidaria	Hydrozoa	Siphonophorae	NA	NA
18SASV_1145	Eukaryota	NA	NA	NA	NA	NA
18SASV_1146	Eukaryota	Ctenophora	NA	NA	NA	NA
18SASV_1147	Eukaryota	Ochrophyta	Diatomea	Bacillariophytina	Mediophyceae	NA
18SASV_1148	Eukaryota	Ochrophyta	Diatomea	Bacillariophytina	Mediophyceae	NA
18SASV_1149	Eukaryota	Prymnesiophyceae	Prymnesiophyceae_cl	Prymnesiophyceae_or	Prymnesiophyceae_fa	Phaeocystis
18SASV_1150	Eukaryota	Ochrophyta	Diatomea	Bacillariophytina	Mediophyceae	Chaetoceros
18SASV_1151	Eukaryota	Chlorophyta_ph	Mamiellophyceae	Mamiellophyceae_or	Mamiellophyceae_fa	Dolichomastix
18SASV_1152	Eukaryota	Cryptomonadales	Cryptomonadales_cl	Cryptomonadales_or	Cryptomonadales_fa	Geminigera
18SASV_1153	Eukaryota	Ochrophyta	Diatomea	Bacillariophytina	Mediophyceae	NA
18SASV_1154	Eukaryota	Ochrophyta	Diatomea	Bacillariophytina	Mediophyceae	Odontella
18SASV_1155	Eukaryota	Ochrophyta	Diatomea	Bacillariophytina	Mediophyceae	Odontella
18SASV_1156	Eukaryota	Ochrophyta	Diatomea	Bacillariophytina	Mediophyceae	Odontella
18SASV_1157	Eukaryota	Annelida	Polychaeta	NA	NA	NA
18SASV_1158	Eukaryota	NA	NA	NA	NA	NA
18SASV_1159	Eukaryota	NA	NA	NA	NA	NA
18SASV_1160	Eukaryota	Ochrophyta	Diatomea	Bacillariophytina	Mediophyceae	Thalassiosira
18SASV_1161	Eukaryota	Cercozoa	Thecofilosea	Cryomonadida	Rhizaspididae	Rhogostoma
18SASV_1162	Eukaryota	Ochrophyta	Diatomea	Bacillariophytina	Mediophyceae	NA
18SASV_1163	Eukaryota	Cryptomonadales	Cryptomonadales_cl	Cryptomonadales_or	Cryptomonadales_fa	Geminigera
18SASV_1164	Eukaryota	Cryptomonadales	Cryptomonadales_cl	Cryptomonadales_or	Cryptomonadales_fa	Geminigera
18SASV_1165	Eukaryota	Dinoflagellata	Dinophyceae	NA	NA	NA
18SASV_1166	Eukaryota	Arthropoda	Maxillopoda	Harpacticoida	NA	NA
18SASV_1167	Eukaryota	Dinoflagellata	Dinophyceae	Gymnodiniphycidae	Gymnodiniphycidae_fa	Gyrodinium
18SASV_1168	Eukaryota	Dinoflagellata	Dinophyceae	Gymnodiniphycidae	Gymnodinium_clade	Gymnodinium
18SASV_1169	Eukaryota	Ochrophyta	MOCH-2	NA	NA	NA
18SASV_1170	Eukaryota	Protalveolata	Syndiniales	Syndiniales_or	Syndiniales_Group_I	NA
18SASV_1171	Eukaryota	Dinoflagellata	Dinophyceae	Gymnodiniphycidae	Gymnodinium_clade	NA
18SASV_1172	Eukaryota	Incertae_Sedis	NA	NA	NA	NA
18SASV_1173	Eukaryota	Ochrophyta	Diatomea	Bacillariophytina	Mediophyceae	NA
18SASV_1174	Eukaryota	Dinoflagellata	Dinophyceae	Gymnodiniphycidae	Suessiaceae	Biecheleria
18SASV_1175	Eukaryota	Ciliophora	Intramacronucleata	Spirotrichea	Hypotrichia	Tachysoma
18SASV_1176	Eukaryota	Labyrinthulomycetes	Labyrinthulomycetes_cl	Labyrinthulomycetes_or	Thraustochytriaceae	NA
18SASV_1177	Eukaryota	Ochrophyta	Raphidophyceae	Chattonellales	Chattonellales_fa	NA
18SASV_1178	Eukaryota	Ochrophyta	Diatomea	Bacillariophytina	Bacillariophyceae	Navicula
18SASV_1179	Eukaryota	Ochrophyta	Diatomea	Bacillariophytina	NA	NA
18SASV_1180	Eukaryota	Ochrophyta	Diatomea	Bacillariophytina	Mediophyceae	NA
18SASV_1181	Eukaryota	Cryptomonadales	Cryptomonadales_cl	Cryptomonadales_or	Cryptomonadales_fa	Geminigera
18SASV_1182	Eukaryota	Protalveolata	Syndiniales	Syndiniales_or	Syndiniales_Group_II	NA
18SASV_1183	Eukaryota	Dinoflagellata	Dinophyceae	Gymnodiniphycidae	Gymnodinium_clade	Gymnodinium
18SASV_1184	Eukaryota	NA	NA	NA	NA	NA
18SASV_1185	Eukaryota	Incertae_Sedis_ph	Incertae_Sedis_cl	Incertae_Sedis_or	Incertae_Sedis_fa	Telonema
18SASV_1186	Eukaryota	Cryptomonadales	Cryptomonadales_cl	Cryptomonadales_or	Cryptomonadales_fa	Geminigera
18SASV_1187	Eukaryota	Picozoa	Picomonadida	Picomonadidae	Picomonadidae_fa	Picomonas
18SASV_1188	Eukaryota	NA	NA	NA	NA	NA
18SASV_1189	Eukaryota	Dinoflagellata	Dinophyceae	NA	NA	NA
18SASV_1190	Eukaryota	NA	NA	NA	NA	NA
18SASV_1191	Eukaryota	Ochrophyta	Diatomea	Bacillariophytina	Mediophyceae	Eucampia
18SASV_1192	Eukaryota	Ciliophora	Intramacronucleata	Conthreep	NA	NA
18SASV_1193	Eukaryota	Dinoflagellata	Dinophyceae	NA	NA	NA
18SASV_1194	Eukaryota	Protalveolata	Syndiniales	Syndiniales_or	Syndiniales_Group_II	NA
18SASV_1195	Eukaryota	Dinoflagellata	Dinophyceae	Gymnodiniphycidae	Gymnodiniphycidae_fa	Ptychodiscus
18SASV_1196	Eukaryota	Ochrophyta	Diatomea	Bacillariophytina	Mediophyceae	NA
18SASV_1197	Eukaryota	Protalveolata	Syndiniales	Syndiniales_or	Syndiniales_Group_II	NA
18SASV_1198	Eukaryota	Protalveolata	Syndiniales	Syndiniales_or	Syndiniales_Group_II	NA
18SASV_1199	Eukaryota	Ochrophyta	Diatomea	Bacillariophytina	Mediophyceae	Chaetoceros
18SASV_1200	Eukaryota	Ochrophyta	Chrysophyceae	NA	NA	NA
18SASV_1201	Eukaryota	MAST-2	NA	NA	NA	NA
18SASV_1202	Eukaryota	Cryptomonadales	NA	NA	NA	NA
18SASV_1203	Eukaryota	Incertae_Sedis_ph	Incertae_Sedis_cl	Incertae_Sedis_or	Incertae_Sedis_fa	Telonema
18SASV_1204	Eukaryota	Ochrophyta	Diatomea	Bacillariophytina	Mediophyceae	NA
18SASV_1205	Eukaryota	Ochrophyta	Diatomea	Bacillariophytina	Mediophyceae	NA
18SASV_1206	Eukaryota	Ochrophyta	Diatomea	Bacillariophytina	Mediophyceae	Odontella
18SASV_1207	Eukaryota	Dinoflagellata	Dinophyceae	NA	NA	NA
18SASV_1208	Eukaryota	Cnidaria	Hydrozoa	NA	NA	NA
18SASV_1209	Eukaryota	Ciliophora	Intramacronucleata	Spirotrichea	Choreotrichia	NA
18SASV_1210	Eukaryota	Ochrophyta	Pelagophyceae	Sarcinochrysidales	Sarcinochrysidales_fa	SS1-E01-69
18SASV_1211	Eukaryota	Cryptomonadales	Cryptomonadales_cl	Cryptomonadales_or	Cryptomonadales_fa	Geminigera
18SASV_1212	Eukaryota	Picozoa	Picomonadida	Picomonadidae	Picomonadidae_fa	Picomonas
18SASV_1213	Eukaryota	Dinoflagellata	Dinophyceae	Gymnodiniphycidae	Gymnodiniphycidae_fa	Gyrodinium
18SASV_1214	Eukaryota	Dinoflagellata	Dinophyceae	Peridiniphycidae	NA	NA
18SASV_1215	Eukaryota	Protalveolata	Syndiniales	Syndiniales_or	Syndiniales_Group_I	NA
18SASV_1216	Eukaryota	Dinoflagellata	Dinophyceae	Gymnodiniphycidae	Gymnodinium_clade	NA
18SASV_1217	Eukaryota	Ochrophyta	Diatomea	Bacillariophytina	Bacillariophyceae	Pseudo-nitzschia
18SASV_1218	Eukaryota	Dinoflagellata	Dinophyceae	NA	NA	NA
18SASV_1219	Eukaryota	Prymnesiophyceae	Prymnesiophyceae_cl	Prymnesiophyceae_or	Prymnesiophyceae_fa	Phaeocystis
18SASV_1220	Eukaryota	Cryptomonadales	Cryptomonadales_cl	Cryptomonadales_or	Cryptomonadales_fa	Geminigera
18SASV_1221	Eukaryota	Dinoflagellata	Dinophyceae	Gymnodiniphycidae	Gymnodiniphycidae_fa	Gyrodinium
18SASV_1222	Eukaryota	Ochrophyta	Diatomea	Bacillariophytina	Mediophyceae	Odontella
18SASV_1223	Eukaryota	Cryptomonadales	Cryptomonadales_cl	Cryptomonadales_or	Cryptomonadales_fa	Geminigera
18SASV_1224	Eukaryota	NA	NA	NA	NA	NA
18SASV_1225	Eukaryota	Dinoflagellata	Dinophyceae	Gymnodiniphycidae	Gymnodinium_clade	Gymnodinium
18SASV_1226	Eukaryota	Dinoflagellata	Dinophyceae	NA	NA	NA
18SASV_1227	Eukaryota	Picozoa	Picomonadida	Picomonadidae	Picomonadidae_fa	Picomonas
18SASV_1228	Eukaryota	Ochrophyta	Ochrophyta_cl	Ochrophyta_or	Ochrophyta_fa	Bolidomonas
18SASV_1229	Eukaryota	Protalveolata	Syndiniales	Syndiniales_or	Syndiniales_fa	Amoebophrya
18SASV_1230	Eukaryota	Protalveolata	Syndiniales	Syndiniales_or	Syndiniales_Group_I	NA
18SASV_1231	Eukaryota	Incertae_Sedis	Incertae_Sedis_cl	Incertae_Sedis_or	Incertae_Sedis_fa	Pirsonia
18SASV_1232	Eukaryota	Protalveolata	Syndiniales	Syndiniales_or	Syndiniales_Group_II	NA
18SASV_1233	Eukaryota	Ciliophora	Intramacronucleata	Conthreep	Phyllopharyngea	Dysteria
18SASV_1234	Eukaryota	Cryptomonadales	Cryptomonadales_cl	Cryptomonadales_or	Cryptomonadales_fa	Geminigera
18SASV_1235	Eukaryota	Dinoflagellata	Dinophyceae	Peridiniphycidae	Gonyaulacales	Azadinium
18SASV_1236	Eukaryota	Ochrophyta	Diatomea	Bacillariophytina	Bacillariophyceae	Fragilariopsis
18SASV_1237	Eukaryota	Prymnesiophyceae	Prymnesiophyceae_cl	Prymnesiophyceae_or	Prymnesiophyceae_fa	Phaeocystis
18SASV_1238	Eukaryota	Ochrophyta	Diatomea	Bacillariophytina	Mediophyceae	NA
18SASV_1239	Eukaryota	Ochrophyta	Pelagophyceae	Sarcinochrysidales	Sarcinochrysidales_fa	SS1-E01-69
18SASV_1240	Eukaryota	Dinoflagellata	Dinophyceae	NA	NA	NA
18SASV_1241	Eukaryota	Dinoflagellata	Dinophyceae	Peridiniphycidae	Gonyaulacales	Azadinium
18SASV_1242	Eukaryota	Ochrophyta	Diatomea	Coscinodiscophytina	Fragilariales	Thalassionema
18SASV_1243	Eukaryota	Ochrophyta	Diatomea	Coscinodiscophytina	Coscinodiscophytina_fa	Actinocyclus
18SASV_1244	Eukaryota	Ochrophyta	Diatomea	Bacillariophytina	Mediophyceae	Minidiscus
18SASV_1245	Eukaryota	Ochrophyta	Diatomea	Coscinodiscophytina	Coscinodiscophytina_fa	Actinocyclus
18SASV_1246	Eukaryota	Dinoflagellata	Dinophyceae	Gymnodiniphycidae	Kareniaceae	Karlodinium
18SASV_1247	Eukaryota	Ciliophora	Intramacronucleata	Conthreep	Phyllopharyngea	Pithites
18SASV_1248	Eukaryota	Dinoflagellata	Dinophyceae	Gymnodiniphycidae	Gymnodiniphycidae_fa	Gyrodinium
18SASV_1249	Eukaryota	Picozoa	Picomonadida	Picomonadidae	Picomonadidae_fa	Picomonas
18SASV_1250	Eukaryota	Dinoflagellata	Dinophyceae	Gymnodiniphycidae	NA	NA
18SASV_1251	Eukaryota	Chlorophyta_ph	Mamiellophyceae	Mamiellales	Mamiellales_fa	NA
18SASV_1252	Eukaryota	Dinoflagellata	Dinophyceae	Gymnodiniphycidae	NA	NA
18SASV_1253	Eukaryota	Ochrophyta	Diatomea	Coscinodiscophytina	Corethrids	Corethron
18SASV_1254	Eukaryota	Ochrophyta	Diatomea	Bacillariophytina	Mediophyceae	NA
18SASV_1255	Eukaryota	Dinoflagellata	Dinophyceae	Gymnodiniphycidae	NA	NA
18SASV_1256	Eukaryota	Ochrophyta	NA	NA	NA	NA
18SASV_1257	Eukaryota	Ochrophyta	Diatomea	Bacillariophytina	Mediophyceae	NA
18SASV_1258	Eukaryota	Cryptomonadales	Cryptomonadales_cl	Cryptomonadales_or	Cryptomonadales_fa	Geminigera
18SASV_1259	Eukaryota	Dinoflagellata	Dinophyceae	Gymnodiniphycidae	Gymnodinium_clade	NA
18SASV_1260	Eukaryota	Dinoflagellata	Dinophyceae	NA	NA	NA
18SASV_1261	Eukaryota	MAST-3	MAST-3I	NA	NA	NA
18SASV_1262	Eukaryota	Cercozoa	NA	NA	NA	NA
18SASV_1263	Eukaryota	MAST-3	MAST-3F	NA	NA	NA
18SASV_1264	Eukaryota	Protalveolata	Syndiniales	Syndiniales_or	Syndiniales_fa	Amoebophrya
18SASV_1265	Eukaryota	Dinoflagellata	Dinophyceae	NA	NA	NA
18SASV_1266	Eukaryota	Dinoflagellata	Dinophyceae	Gymnodiniphycidae	Gymnodinium_clade	NA
18SASV_1267	Eukaryota	Ochrophyta	NA	NA	NA	NA
18SASV_1268	Eukaryota	Ochrophyta	Diatomea	Bacillariophytina	Mediophyceae	NA
18SASV_1269	Eukaryota	Ochrophyta	Diatomea	Bacillariophytina	Mediophyceae	Chaetoceros
18SASV_1270	Eukaryota	Ciliophora	Intramacronucleata	Spirotrichea	Hypotrichia	NA
18SASV_1271	Eukaryota	Cercozoa	NA	NA	NA	NA
18SASV_1272	Eukaryota	NA	NA	NA	NA	NA
18SASV_1273	Eukaryota	NA	NA	NA	NA	NA
18SASV_1274	Eukaryota	Dinoflagellata	Dinophyceae	NA	NA	NA
18SASV_1275	Eukaryota	Dinoflagellata	Dinophyceae	Gymnodiniphycidae	NA	NA
18SASV_1276	Eukaryota	Incertae_Sedis_ph	Incertae_Sedis_cl	Incertae_Sedis_or	Incertae_Sedis_fa	Telonema
18SASV_1277	Eukaryota	Protalveolata	Syndiniales	Syndiniales_or	Syndiniales_Group_II	NA
18SASV_1278	Eukaryota	Ciliophora	Intramacronucleata	Conthreep	Phyllopharyngea	Pithites
18SASV_1279	Eukaryota	NA	NA	NA	NA	NA
18SASV_1280	Eukaryota	Ochrophyta	Diatomea	Bacillariophytina	Mediophyceae	NA
18SASV_1281	Eukaryota	NA	NA	NA	NA	NA
18SASV_1282	Eukaryota	MAST-2	NA	NA	NA	NA
18SASV_1283	Eukaryota	Ascomycota	Schizosaccharomycetes	Schizosaccharomycetales	Schizosaccharomycetaceae	Schizosaccharomyces
18SASV_1284	Eukaryota	Ochrophyta	NA	NA	NA	NA
18SASV_1285	Eukaryota	Picozoa	Picomonadida	Picomonadidae	Picomonadidae_fa	Picomonas
18SASV_1286	Eukaryota	Ascomycota	Schizosaccharomycetes	Schizosaccharomycetales	Schizosaccharomycetaceae	Schizosaccharomyces
18SASV_1287	Eukaryota	Dinoflagellata	Dinophyceae	Gymnodiniphycidae	NA	NA
18SASV_1288	Eukaryota	Ochrophyta	Diatomea	Coscinodiscophytina	Corethrids	Corethron
18SASV_1289	Eukaryota	Ochrophyta	Diatomea	Bacillariophytina	Mediophyceae	Thalassiosira
18SASV_1290	Eukaryota	Dinoflagellata	Dinophyceae	Gymnodiniphycidae	Gymnodinium_clade	Gymnodinium
18SASV_1291	Eukaryota	Picozoa	Picomonadida	Picomonadidae	Picomonadidae_fa	Picomonas
18SASV_1292	Eukaryota	Picozoa	Picomonadida	Picomonadidae	Picomonadidae_fa	Picomonas
18SASV_1293	Eukaryota	Ochrophyta	Diatomea	Bacillariophytina	Mediophyceae	Thalassiosira
18SASV_1294	Eukaryota	Dinoflagellata	Dinophyceae	NA	NA	NA
18SASV_1295	Eukaryota	Incertae_Sedis_ph	Incertae_Sedis_cl	Incertae_Sedis_or	Incertae_Sedis_fa	Telonema
18SASV_1296	Eukaryota	Ochrophyta	Diatomea	Coscinodiscophytina	Rhizosolenids	Proboscia
18SASV_1297	Eukaryota	Ochrophyta	Diatomea	Coscinodiscophytina	Rhizosolenids	Proboscia
18SASV_1298	Eukaryota	Dinoflagellata	Dinophyceae	Peridiniphycidae	Gonyaulacales	Azadinium
18SASV_1299	Eukaryota	Dinoflagellata	Dinophyceae	Gymnodiniphycidae	Gymnodinium_clade	Gyrodiniellum
18SASV_1300	Eukaryota	Ochrophyta	Diatomea	Coscinodiscophytina	Fragilariales	Grammonema
18SASV_1301	Eukaryota	Dinoflagellata	NA	NA	NA	NA
18SASV_1302	Eukaryota	Dinoflagellata	Dinophyceae	NA	NA	NA
18SASV_1303	Eukaryota	NA	NA	NA	NA	NA
18SASV_1304	Eukaryota	Ochrophyta	Diatomea	Bacillariophytina	Bacillariophyceae	Fragilariopsis
18SASV_1305	Eukaryota	NA	NA	NA	NA	NA
18SASV_1306	Eukaryota	Dinoflagellata	Dinophyceae	Peridiniphycidae	Gonyaulacales	Azadinium
18SASV_1307	Eukaryota	Ochrophyta	Diatomea	Coscinodiscophytina	NA	NA
18SASV_1308	Eukaryota	Ochrophyta	Diatomea	Coscinodiscophytina	NA	NA
18SASV_1309	Eukaryota	Ochrophyta	Diatomea	Bacillariophytina	Mediophyceae	Minidiscus
18SASV_1310	Eukaryota	Ochrophyta	Diatomea	Bacillariophytina	Mediophyceae	Chaetoceros
18SASV_1311	Eukaryota	Ochrophyta	Diatomea	Bacillariophytina	Mediophyceae	Chaetoceros
18SASV_1312	Eukaryota	Dinoflagellata	Dinophyceae	Gymnodiniphycidae	NA	NA
18SASV_1313	Eukaryota	Protalveolata	Syndiniales	Syndiniales_or	Syndiniales_fa	Amoebophrya
18SASV_1314	Eukaryota	NA	NA	NA	NA	NA
18SASV_1315	Eukaryota	Ochrophyta	Diatomea	Bacillariophytina	Mediophyceae	NA
18SASV_1316	Eukaryota	Dinoflagellata	Dinophyceae	Gymnodiniphycidae	Kareniaceae	NA
18SASV_1317	Eukaryota	Dinoflagellata	Dinophyceae	Gymnodiniphycidae	Gymnodinium_clade	NA
18SASV_1318	Eukaryota	Ochrophyta	Diatomea	Bacillariophytina	Mediophyceae	NA
18SASV_1319	Eukaryota	Chlorophyta_ph	Prasinophytae	Pyramimonadales	Pyramimonadales_fa	Pterosperma
18SASV_1320	Eukaryota	Ochrophyta	Diatomea	Bacillariophytina	Mediophyceae	Chaetoceros
18SASV_1321	Eukaryota	Dinoflagellata	Dinophyceae	Peridiniphycidae	NA	NA
18SASV_1322	Eukaryota	Ochrophyta	Diatomea	Bacillariophytina	Mediophyceae	Minidiscus
18SASV_1323	Eukaryota	Dinoflagellata	Dinophyceae	Gymnodiniphycidae	NA	NA
18SASV_1324	Eukaryota	Protalveolata	Syndiniales	Syndiniales_or	Syndiniales_Group_I	NA
18SASV_1325	Eukaryota	Prymnesiophyceae	Prymnesiophyceae_cl	Prymnesiophyceae_or	Prymnesiophyceae_fa	Phaeocystis
18SASV_1326	Eukaryota	Ochrophyta	Diatomea	Bacillariophytina	Mediophyceae	NA
18SASV_1327	Eukaryota	Protalveolata	Syndiniales	Syndiniales_or	Syndiniales_fa	Amoebophrya
18SASV_1328	Eukaryota	Cryptomonadales	Cryptomonadales_cl	Cryptomonadales_or	Cryptomonadales_fa	Geminigera
18SASV_1329	Eukaryota	Ochrophyta	NA	NA	NA	NA
18SASV_1330	Eukaryota	Dinoflagellata	Dinophyceae	Gymnodiniphycidae	Gymnodiniphycidae_fa	Gyrodinium
18SASV_1331	Eukaryota	Nemertea	Anopla	Heteronemertea	NA	NA
18SASV_1332	Eukaryota	Ochrophyta	Diatomea	Coscinodiscophytina	Corethrids	Corethron
18SASV_1333	Eukaryota	Protalveolata	Syndiniales	Syndiniales_or	Syndiniales_fa	Amoebophrya
18SASV_1334	Eukaryota	MAST-3	NA	NA	NA	NA
18SASV_1335	Eukaryota	Choanoflagellida	Acanthoecida	Stephanoecidae	Stephanoecidae_fa	Diaphanoeca
18SASV_1336	Eukaryota	Ochrophyta	Diatomea	Bacillariophytina	Bacillariophyceae	Navicula
18SASV_1337	Eukaryota	NA	NA	NA	NA	NA
18SASV_1338	Eukaryota	Incertae_Sedis_ph	Incertae_Sedis_cl	Incertae_Sedis_or	Incertae_Sedis_fa	Telonema
18SASV_1339	Eukaryota	Dinoflagellata	Dinophyceae	NA	NA	NA
18SASV_1340	Eukaryota	Labyrinthulomycetes	NA	NA	NA	NA
18SASV_1341	Eukaryota	Ciliophora	Intramacronucleata	Conthreep	Oligohymenophorea	Homalogastra
18SASV_1342	Eukaryota	Ciliophora	Intramacronucleata	Conthreep	NA	NA
18SASV_1343	Eukaryota	Ochrophyta	Diatomea	Bacillariophytina	Mediophyceae	Thalassiosira
18SASV_1344	Eukaryota	Protalveolata	Syndiniales	Syndiniales_or	Syndiniales_Group_II	NA
18SASV_1345	Eukaryota	Dinoflagellata	Dinophyceae	NA	NA	NA
18SASV_1346	Eukaryota	Protalveolata	Syndiniales	Syndiniales_or	Syndiniales_Group_II	NA
18SASV_1347	Eukaryota	Ochrophyta	Diatomea	Bacillariophytina	Mediophyceae	Chaetoceros
18SASV_1348	Eukaryota	Ochrophyta	Diatomea	Bacillariophytina	Bacillariophyceae	Achnanthidium
18SASV_1349	Eukaryota	Ochrophyta	Diatomea	Bacillariophytina	Bacillariophyceae	Navicula
18SASV_1350	Eukaryota	Ochrophyta	Diatomea	Bacillariophytina	Bacillariophyceae	Navicula
18SASV_1351	Eukaryota	Ochrophyta	Diatomea	Bacillariophytina	Mediophyceae	NA
18SASV_1352	Eukaryota	Dinoflagellata	Dinophyceae	NA	NA	NA
18SASV_1353	Eukaryota	Dinoflagellata	Dinophyceae	Peridiniphycidae	Gonyaulacales	Azadinium
18SASV_1354	Eukaryota	Ochrophyta	Diatomea	Bacillariophytina	Bacillariophyceae	Fragilariopsis
18SASV_1355	Eukaryota	Ochrophyta	Diatomea	Bacillariophytina	Mediophyceae	Minidiscus
18SASV_1356	Eukaryota	Nemertea	Anopla	Heteronemertea	NA	NA
18SASV_1357	Eukaryota	Protalveolata	Syndiniales	Syndiniales_or	Syndiniales_Group_II	NA
18SASV_1358	Eukaryota	Dinoflagellata	Dinophyceae	NA	NA	NA
18SASV_1359	Eukaryota	Dinoflagellata	Dinophyceae	Gymnodiniphycidae	Kareniaceae	Karlodinium
18SASV_1360	Eukaryota	Prymnesiophyceae	Prymnesiales	NA	NA	NA
18SASV_1361	Eukaryota	Ciliophora	Intramacronucleata	Conthreep	Oligohymenophorea	NA
18SASV_1362	Eukaryota	Ciliophora	Intramacronucleata	Spirotrichea	Choreotrichia	Codonellopsis
18SASV_1363	Eukaryota	Cryptomonadales	Cryptomonadales_cl	Cryptomonadales_or	Cryptomonadales_fa	NA
18SASV_1364	Eukaryota	Bryozoa	Gymnolaemata	Ctenostomatida	NA	NA
18SASV_1365	Eukaryota	Cryptomonadales	Cryptomonadales_cl	Cryptomonadales_or	Cryptomonadales_fa	NA
18SASV_1366	Eukaryota	Ciliophora	Intramacronucleata	Spirotrichea	Choreotrichia	NA
18SASV_1367	Eukaryota	Ochrophyta	Dictyochophyceae	Florenciellales	Florenciellales_fa	Pseudochattonella
18SASV_1368	Eukaryota	Ochrophyta	Diatomea	Bacillariophytina	Bacillariophyceae	Navicula
18SASV_1369	Eukaryota	Dinoflagellata	Dinophyceae	Gymnodiniphycidae	Gymnodiniphycidae_fa	Gyrodinium
18SASV_1370	Eukaryota	Dinoflagellata	Dinophyceae	Gymnodiniphycidae	Gymnodiniphycidae_fa	Gyrodinium
18SASV_1371	Eukaryota	Dinoflagellata	Dinophyceae	Gymnodiniphycidae	NA	NA
18SASV_1372	Eukaryota	Dinoflagellata	NA	NA	NA	NA
18SASV_1373	Eukaryota	Picozoa	Picomonadida	Picomonadidae	Picomonadidae_fa	Picomonas
18SASV_1374	Eukaryota	Ochrophyta	Diatomea	Bacillariophytina	Mediophyceae	NA
18SASV_1375	Eukaryota	Ochrophyta	Diatomea	Bacillariophytina	Mediophyceae	NA
18SASV_1376	Eukaryota	Ochrophyta	Diatomea	Bacillariophytina	Bacillariophyceae	Navicula
18SASV_1377	Eukaryota	Cryptomonadales	Cryptomonadales_cl	Cryptomonadales_or	Cryptomonadales_fa	Geminigera
18SASV_1378	Eukaryota	Dinoflagellata	Dinophyceae	Peridiniphycidae	NA	NA
18SASV_1379	Eukaryota	Dinoflagellata	Dinophyceae	NA	NA	NA
18SASV_1380	Eukaryota	Choanoflagellida	Acanthoecida	Stephanoecidae	Stephanoecidae_fa	NA
18SASV_1381	Eukaryota	Ochrophyta	Diatomea	Bacillariophytina	Mediophyceae	NA
18SASV_1382	Eukaryota	Cercozoa	NA	NA	NA	NA
18SASV_1383	Eukaryota	Dinoflagellata	NA	NA	NA	NA
18SASV_1384	Eukaryota	Ochrophyta	Diatomea	Bacillariophytina	Bacillariophyceae	Navicula
18SASV_1385	Eukaryota	Florideophycidae	Nemaliophycidae	Nemaliophycidae_or	Nemaliophycidae_fa	Rhodophysema
18SASV_1386	Eukaryota	Ochrophyta	Diatomea	Coscinodiscophytina	NA	NA
18SASV_1387	Eukaryota	Ochrophyta	Diatomea	Coscinodiscophytina	NA	NA
18SASV_1388	Eukaryota	Ochrophyta	Diatomea	Coscinodiscophytina	NA	NA
18SASV_1389	Eukaryota	Dinoflagellata	Dinophyceae	NA	NA	NA
18SASV_1390	Eukaryota	Prymnesiophyceae	Prymnesiophyceae_cl	Prymnesiophyceae_or	Prymnesiophyceae_fa	Phaeocystis
18SASV_1391	Eukaryota	Cercozoa	Thecofilosea	Cryomonadida	Rhizaspididae	Rhogostoma
18SASV_1392	Eukaryota	Cercozoa	Imbricatea	Marimonadida	Marimonadida_fa	Pseudopirsonia
18SASV_1393	Eukaryota	Ochrophyta	Diatomea	Coscinodiscophytina	Fragilariales	Grammonema
18SASV_1394	Eukaryota	Protalveolata	Syndiniales	NA	NA	NA
18SASV_1395	Eukaryota	Cryptomonadales	Cryptomonadales_cl	Cryptomonadales_or	Cryptomonadales_fa	Geminigera
18SASV_1396	Eukaryota	Ochrophyta	Diatomea	Bacillariophytina	Bacillariophyceae	Navicula
18SASV_1397	Eukaryota	Protalveolata	Syndiniales	Syndiniales_or	Syndiniales_Group_II	NA
18SASV_1398	Eukaryota	Dinoflagellata	Dinophyceae	Gymnodiniphycidae	Gymnodiniphycidae_fa	Gyrodinium
18SASV_1399	Eukaryota	Ochrophyta	Diatomea	Coscinodiscophytina	Coscinodiscophytina_fa	Actinocyclus
18SASV_1400	Eukaryota	Chlorophyta_ph	Prasinophytae	Pyramimonadales	Pyramimonadales_fa	Pterosperma
18SASV_1401	Eukaryota	Prymnesiophyceae	Prymnesiales	Prymnesiales_or	Prymnesiales_fa	Chrysochromulina
18SASV_1402	Eukaryota	Dinoflagellata	NA	NA	NA	NA
18SASV_1403	Eukaryota	Protalveolata	Syndiniales	Syndiniales_or	Syndiniales_Group_I	NA
18SASV_1404	Eukaryota	Ochrophyta	Chrysophyceae	Ochromonadales	Ochromonadales_fa	Paraphysomonas
18SASV_1405	Eukaryota	Dinoflagellata	NA	NA	NA	NA
18SASV_1406	Eukaryota	Dinoflagellata	Dinophyceae	NA	NA	NA
18SASV_1407	Eukaryota	Protalveolata	Syndiniales	Syndiniales_or	Syndiniales_Group_II	NA
18SASV_1408	Eukaryota	Chlorophyta_ph	Prasinophytae	Pyramimonadales	Pyramimonadales_fa	Pterosperma
18SASV_1409	Eukaryota	Dinoflagellata	Dinophyceae	NA	NA	NA
18SASV_1410	Eukaryota	Ciliophora	Intramacronucleata	Spirotrichea	Hypotrichia	Holosticha
18SASV_1411	Eukaryota	Cercozoa	Imbricatea	Marimonadida	Marimonadida_fa	Pseudopirsonia
18SASV_1412	Eukaryota	Dinoflagellata	Dinophyceae	Peridiniphycidae	Thoracosphaeraceae	Scrippsiella
18SASV_1413	Eukaryota	Dinoflagellata	Dinophyceae	Gymnodiniphycidae	Gymnodinium_clade	Gyrodiniellum
18SASV_1414	Eukaryota	Dinoflagellata	Dinophyceae	Gymnodiniphycidae	NA	NA
18SASV_1415	Eukaryota	Dinoflagellata	Dinophyceae	Gymnodiniphycidae	Gymnodinium_clade	Gymnodinium
18SASV_1416	Eukaryota	Ochrophyta	Pelagophyceae	Sarcinochrysidales	Sarcinochrysidales_fa	SS1-E01-69
18SASV_1417	Eukaryota	Chlorophyta_ph	Mamiellophyceae	Mamiellales	Mamiellales_fa	Mamiella
18SASV_1418	Eukaryota	Protalveolata	Syndiniales	Syndiniales_or	Syndiniales_Group_II	NA
18SASV_1419	Eukaryota	Protalveolata	Syndiniales	Syndiniales_or	Syndiniales_Group_II	NA
18SASV_1420	Eukaryota	Protalveolata	Syndiniales	Syndiniales_or	Syndiniales_Group_II	NA
18SASV_1421	Eukaryota	NA	NA	NA	NA	NA
18SASV_1422	Eukaryota	Dinoflagellata	Incertae_Sedis	Incertae_Sedis_or	Incertae_Sedis_fa	Haplozoon
18SASV_1423	Eukaryota	Dinoflagellata	Dinophyceae	NA	NA	NA
18SASV_1424	Eukaryota	NA	NA	NA	NA	NA
18SASV_1425	Eukaryota	Dinoflagellata	Dinophyceae	Gymnodiniphycidae	NA	NA
18SASV_1426	Eukaryota	Dinoflagellata	Dinophyceae	Peridiniphycidae	NA	NA
18SASV_1427	Eukaryota	Protalveolata	Syndiniales	Syndiniales_or	Syndiniales_fa	Amoebophrya
18SASV_1428	Eukaryota	Annelida	Polychaeta	Capitellida	NA	NA
18SASV_1429	Eukaryota	Ciliophora	Intramacronucleata	Conthreep	NA	NA
18SASV_1430	Eukaryota	Ciliophora	Intramacronucleata	Conthreep	Phyllopharyngea	Ephelota
18SASV_1431	Eukaryota	Ochrophyta	Diatomea	ME-Euk-FW10	NA	NA
18SASV_1432	Eukaryota	Ochrophyta	Diatomea	Bacillariophytina	Mediophyceae	Chaetoceros
18SASV_1433	Eukaryota	NA	NA	NA	NA	NA
18SASV_1434	Eukaryota	Ochrophyta	Diatomea	Bacillariophytina	Mediophyceae	NA
18SASV_1435	Eukaryota	Dinoflagellata	Dinophyceae	NA	NA	NA
18SASV_1436	Eukaryota	Protalveolata	Syndiniales	Syndiniales_or	Syndiniales_Group_II	NA
18SASV_1437	Eukaryota	Ochrophyta	Diatomea	Bacillariophytina	Bacillariophyceae	NA
18SASV_1438	Eukaryota	NA	NA	NA	NA	NA
18SASV_1439	Eukaryota	Incertae_Sedis_ph	Incertae_Sedis_cl	Incertae_Sedis_or	Incertae_Sedis_fa	Telonema
18SASV_1440	Eukaryota	Cercozoa	NA	NA	NA	NA
18SASV_1441	Eukaryota	Dinoflagellata	Dinophyceae	Gymnodiniphycidae	NA	NA
18SASV_1442	Eukaryota	Protalveolata	Syndiniales	Syndiniales_or	Syndiniales_fa	Amoebophrya
18SASV_1443	Eukaryota	Florideophycidae	Rhodymeniophycidae	Rhodymeniophycidae_or	Rhodymeniophycidae_fa	Curdiea
18SASV_1444	Eukaryota	Ochrophyta	Diatomea	Bacillariophytina	Mediophyceae	NA
18SASV_1445	Eukaryota	Ochrophyta	Diatomea	Bacillariophytina	Mediophyceae	Odontella
18SASV_1446	Eukaryota	Ochrophyta	Diatomea	Bacillariophytina	Mediophyceae	Odontella
18SASV_1447	Eukaryota	Incertae_Sedis_ph	Incertae_Sedis_cl	Incertae_Sedis_or	Incertae_Sedis_fa	Telonema
18SASV_1448	Eukaryota	Dinoflagellata	Dinophyceae	NA	NA	NA
18SASV_1449	Eukaryota	Dinoflagellata	Dinophyceae	Gymnodiniphycidae	Gymnodiniphycidae_fa	Gyrodinium
18SASV_1450	Eukaryota	Ochrophyta	Diatomea	Bacillariophytina	Mediophyceae	NA
18SASV_1451	Eukaryota	Ochrophyta	NA	NA	NA	NA
18SASV_1452	Eukaryota	Ochrophyta	Diatomea	Bacillariophytina	Mediophyceae	Minidiscus
18SASV_1453	Eukaryota	Protalveolata	Syndiniales	Syndiniales_or	Syndiniales_fa	Amoebophrya
18SASV_1454	Eukaryota	Ochrophyta	Diatomea	Bacillariophytina	Mediophyceae	Odontella
18SASV_1455	Eukaryota	Picozoa	Picomonadida	Picomonadidae	Picomonadidae_fa	Picomonas
18SASV_1456	Eukaryota	Ochrophyta	Diatomea	Bacillariophytina	Mediophyceae	Discostella
18SASV_1457	Eukaryota	Dinoflagellata	Dinophyceae	Gymnodiniphycidae	Gymnodiniphycidae_fa	Gyrodinium
18SASV_1458	Eukaryota	Incertae_Sedis	NA	NA	NA	NA
18SASV_1459	Eukaryota	Dinoflagellata	Dinophyceae	Gymnodiniphycidae	Gymnodinium_clade	NA
18SASV_1460	Eukaryota	Dinoflagellata	Dinophyceae	Gymnodiniphycidae	Gymnodinium_clade	NA
18SASV_1461	Eukaryota	Prymnesiophyceae	Prymnesiales	NA	NA	NA
18SASV_1462	Eukaryota	Ochrophyta	Dictyochophyceae	Pedinellales	Pedinellales_fa	Pteridomonas
18SASV_1463	Eukaryota	Ochrophyta	Dictyochophyceae	Florenciellales	Florenciellales_fa	Pseudochattonella
18SASV_1464	Eukaryota	Picozoa	Picomonadida	Picomonadidae	Picomonadidae_fa	Picomonas
18SASV_1465	Eukaryota	Picozoa	Picomonadida	Picomonadidae	Picomonadidae_fa	Picomonas
18SASV_1466	Eukaryota	Dinoflagellata	Dinophyceae	Gymnodiniphycidae	Gymnodiniphycidae_fa	Gyrodinium
18SASV_1467	Eukaryota	Dinoflagellata	Dinophyceae	Gymnodiniphycidae	Gymnodinium_clade	Gymnodinium
18SASV_1468	Eukaryota	Dinoflagellata	NA	NA	NA	NA
18SASV_1469	Eukaryota	Cryptomonadales	Cryptomonadales_cl	Cryptomonadales_or	Cryptomonadales_fa	Geminigera
18SASV_1470	Eukaryota	NA	NA	NA	NA	NA
18SASV_1471	Eukaryota	NA	NA	NA	NA	NA
18SASV_1472	Eukaryota	Dinoflagellata	Dinophyceae	NA	NA	NA
18SASV_1473	Eukaryota	NA	NA	NA	NA	NA
18SASV_1474	Eukaryota	Chlorophyta_ph	Prasinophytae	NA	NA	NA
18SASV_1475	Eukaryota	Picozoa	Picomonadida	Picomonadidae	Picomonadidae_fa	Picomonas
18SASV_1476	Eukaryota	NA	NA	NA	NA	NA
18SASV_1477	Eukaryota	Dinoflagellata	Dinophyceae	Gymnodiniphycidae	Gymnodiniphycidae_fa	Gyrodinium
18SASV_1478	Eukaryota	Dinoflagellata	Dinophyceae	NA	NA	NA
18SASV_1479	Eukaryota	Dinoflagellata	Dinophyceae	Gymnodiniphycidae	Gymnodinium_clade	Gyrodiniellum
18SASV_1480	Eukaryota	Ochrophyta	Diatomea	Bacillariophytina	Mediophyceae	Chaetoceros
18SASV_1481	Eukaryota	Dinoflagellata	Dinophyceae	Gymnodiniphycidae	Gymnodiniphycidae_fa	Gyrodinium
18SASV_1482	Eukaryota	Cryptomonadales	Cryptomonadales_cl	Cryptomonadales_or	Cryptomonadales_fa	Geminigera
18SASV_1483	Eukaryota	Ochrophyta	Diatomea	Bacillariophytina	Mediophyceae	NA
18SASV_1484	Eukaryota	Ochrophyta	Diatomea	Bacillariophytina	Mediophyceae	NA
18SASV_1485	Eukaryota	Ochrophyta	Diatomea	Coscinodiscophytina	Coscinodiscophytina_fa	Actinocyclus
18SASV_1486	Eukaryota	Cercozoa	Thecofilosea	Cryomonadida	Rhizaspididae	Rhogostoma
18SASV_1487	Eukaryota	Ochrophyta	Diatomea	Bacillariophytina	Bacillariophyceae	NA
18SASV_1488	Eukaryota	Cercozoa	Thecofilosea	Cryomonadida	Rhizaspididae	Rhogostoma
18SASV_1489	Eukaryota	Dinoflagellata	Dinophyceae	NA	NA	NA
18SASV_1490	Eukaryota	Dinoflagellata	Dinophyceae	NA	NA	NA
18SASV_1491	Eukaryota	Dinoflagellata	Dinophyceae	Gymnodiniphycidae	Suessiaceae	NA
18SASV_1492	Eukaryota	Ochrophyta	Dictyochophyceae	Pedinellales	Pedinellales_fa	Pteridomonas
18SASV_1493	Eukaryota	NA	NA	NA	NA	NA
18SASV_1494	Eukaryota	Ochrophyta	Diatomea	Bacillariophytina	Bacillariophyceae	NA
18SASV_1495	Eukaryota	Labyrinthulomycetes	NA	NA	NA	NA
18SASV_1496	Eukaryota	Dinoflagellata	Dinophyceae	Gymnodiniphycidae	Gymnodiniphycidae_fa	Gyrodinium
18SASV_1497	Eukaryota	MAST-3	MAST-3E	NA	NA	NA
18SASV_1498	Eukaryota	Protalveolata	Syndiniales	Syndiniales_or	Syndiniales_fa	Amoebophrya
18SASV_1499	Eukaryota	Ochrophyta	Diatomea	Bacillariophytina	Bacillariophyceae	Navicula
18SASV_1500	Eukaryota	Dinoflagellata	Dinophyceae	Gymnodiniphycidae	Gymnodinium_clade	Gyrodiniellum
18SASV_1501	Eukaryota	Ochrophyta	Diatomea	Bacillariophytina	Mediophyceae	Thalassiosira
18SASV_1502	Eukaryota	Dinoflagellata	NA	NA	NA	NA
18SASV_1503	Eukaryota	Ochrophyta	Diatomea	Bacillariophytina	Bacillariophyceae	NA
18SASV_1504	Eukaryota	Chlorophyta_ph	Mamiellophyceae	Mamiellales	Mamiellales_fa	NA
18SASV_1505	Eukaryota	Ochrophyta	Diatomea	Coscinodiscophytina	NA	NA
18SASV_1506	Eukaryota	Dinoflagellata	Dinophyceae	Peridiniphycidae	NA	NA
18SASV_1507	Eukaryota	Ochrophyta	Diatomea	Bacillariophytina	Bacillariophyceae	NA
18SASV_1508	Eukaryota	Ochrophyta	Diatomea	Bacillariophytina	Mediophyceae	NA
18SASV_1509	Eukaryota	Dinoflagellata	Dinophyceae	NA	NA	NA
18SASV_1510	Eukaryota	Dinoflagellata	NA	NA	NA	NA
18SASV_1511	Eukaryota	Dinoflagellata	Dinophyceae	Gymnodiniphycidae	NA	NA
18SASV_1512	Eukaryota	Labyrinthulomycetes	NA	NA	NA	NA
18SASV_1513	Eukaryota	Ochrophyta	Diatomea	Bacillariophytina	Mediophyceae	NA
18SASV_1514	Eukaryota	Cercozoa	Thecofilosea	Cryomonadida	Rhizaspididae	Rhogostoma
18SASV_1515	Eukaryota	Dinoflagellata	Dinophyceae	NA	NA	NA
18SASV_1516	Eukaryota	Ochrophyta	Dictyochophyceae	Pedinellales	Pedinellales_fa	Pedinella
18SASV_1517	Eukaryota	Ochrophyta	Diatomea	Coscinodiscophytina	Rhizosolenids	Proboscia
18SASV_1518	Eukaryota	Dinoflagellata	Dinophyceae	Gymnodiniphycidae	Gymnodiniphycidae_fa	Gyrodinium
18SASV_1519	Eukaryota	Dinoflagellata	Dinophyceae	Gymnodiniphycidae	Gymnodiniphycidae_fa	Gyrodinium
18SASV_1520	Eukaryota	Ochrophyta	Diatomea	Bacillariophytina	Mediophyceae	NA
18SASV_1521	Eukaryota	Dinoflagellata	Dinophyceae	Gymnodiniphycidae	Gymnodiniphycidae_fa	Gyrodinium
18SASV_1522	Eukaryota	Ochrophyta	NA	NA	NA	NA
18SASV_1523	Eukaryota	Dinoflagellata	Dinophyceae	NA	NA	NA
18SASV_1524	Eukaryota	Dinoflagellata	Dinophyceae	Gymnodiniphycidae	Gymnodiniphycidae_fa	Ptychodiscus
18SASV_1525	Eukaryota	Dinoflagellata	Dinophyceae	Gymnodiniphycidae	Gymnodinium_clade	Gyrodiniellum
18SASV_1526	Eukaryota	Incertae_Sedis_ph	Incertae_Sedis_cl	Incertae_Sedis_or	Incertae_Sedis_fa	Telonema
18SASV_1527	Eukaryota	Protalveolata	Syndiniales	Syndiniales_or	Syndiniales_fa	Amoebophrya
18SASV_1528	Eukaryota	Protalveolata	Syndiniales	Syndiniales_or	Syndiniales_Group_II	NA
18SASV_1529	Eukaryota	Ochrophyta	Diatomea	Bacillariophytina	Mediophyceae	NA
18SASV_1530	Eukaryota	Dinoflagellata	NA	NA	NA	NA
18SASV_1531	Eukaryota	Dinoflagellata	Dinophyceae	NA	NA	NA
18SASV_1532	Eukaryota	Dinoflagellata	Dinophyceae	Gymnodiniphycidae	Gymnodiniphycidae_fa	Gyrodinium
18SASV_1533	Eukaryota	Ochrophyta	Dictyochophyceae	NA	NA	NA
18SASV_1534	Eukaryota	Dinoflagellata	Dinophyceae	Peridiniphycidae	Peridiniales	Islandinium
18SASV_1535	Eukaryota	Dinoflagellata	Dinophyceae	Peridiniphycidae	NA	NA
18SASV_1536	Eukaryota	Cercozoa	NA	NA	NA	NA
18SASV_1537	Eukaryota	Ciliophora	Intramacronucleata	Conthreep	NA	NA
18SASV_1538	Eukaryota	Dinoflagellata	Dinophyceae	NA	NA	NA
18SASV_1539	Eukaryota	Dinoflagellata	Dinophyceae	NA	NA	NA
18SASV_1540	Eukaryota	Ochrophyta	Diatomea	Bacillariophytina	Mediophyceae	NA
18SASV_1541	Eukaryota	Cryptomonadales	Cryptomonadales_cl	Cryptomonadales_or	Cryptomonadales_fa	Geminigera
18SASV_1542	Eukaryota	Chlorophyta_ph	Prasinophytae	Pyramimonadales	Pyramimonadales_fa	Pyramimonas
18SASV_1543	Eukaryota	Ochrophyta	Diatomea	Bacillariophytina	Bacillariophyceae	Fragilariopsis
18SASV_1544	Eukaryota	Ciliophora	Intramacronucleata	Spirotrichea	Choreotrichia	Rimostrombidium
18SASV_1545	Eukaryota	Cryptophyceae_ph	Cryptophyceae_cl	Cryptophyceae_or	Cryptophyceae_fa	Goniomonas
18SASV_1546	Eukaryota	NA	NA	NA	NA	NA
18SASV_1547	Eukaryota	Cercozoa	NA	NA	NA	NA
18SASV_1548	Eukaryota	Ochrophyta	Diatomea	Bacillariophytina	Mediophyceae	NA
18SASV_1549	Eukaryota	Ochrophyta	NA	NA	NA	NA
18SASV_1550	Eukaryota	NA	NA	NA	NA	NA
18SASV_1551	Eukaryota	Dinoflagellata	Dinophyceae	Peridiniphycidae	Peridiniales	Heterocapsa
18SASV_1552	Eukaryota	Dinoflagellata	Dinophyceae	Peridiniphycidae	NA	NA
18SASV_1553	Eukaryota	Ciliophora	Intramacronucleata	Conthreep	NA	NA
18SASV_1554	Eukaryota	MAST-12	MAST-12A	NA	NA	NA
18SASV_1555	Eukaryota	Ochrophyta	Diatomea	Coscinodiscophytina	Corethrids	Corethron
18SASV_1556	Eukaryota	Ochrophyta	NA	NA	NA	NA
18SASV_1557	Eukaryota	Labyrinthulomycetes	NA	NA	NA	NA
18SASV_1558	Eukaryota	Dinoflagellata	Dinophyceae	NA	NA	NA
18SASV_1559	Eukaryota	Dinoflagellata	Dinophyceae	Gymnodiniphycidae	Gymnodiniphycidae_fa	NA
18SASV_1560	Eukaryota	Ochrophyta	Diatomea	Bacillariophytina	Mediophyceae	Chaetoceros
18SASV_1561	Eukaryota	Incertae_Sedis	NA	NA	NA	NA
18SASV_1562	Eukaryota	Incertae_Sedis_ph	Incertae_Sedis_cl	Incertae_Sedis_or	Incertae_Sedis_fa	Telonema
18SASV_1563	Eukaryota	Ochrophyta	Diatomea	Bacillariophytina	Mediophyceae	Chaetoceros
18SASV_1564	Eukaryota	Ochrophyta	NA	NA	NA	NA
18SASV_1565	Eukaryota	Cercozoa	NA	NA	NA	NA
18SASV_1566	Eukaryota	Ochrophyta	Diatomea	Coscinodiscophytina	Fragilariales	NA
18SASV_1567	Eukaryota	Dinoflagellata	Dinophyceae	NA	NA	NA
18SASV_1568	Eukaryota	Ochrophyta	Diatomea	Bacillariophytina	Mediophyceae	Odontella
18SASV_1569	Eukaryota	Ochrophyta	Diatomea	Bacillariophytina	Bacillariophyceae	Cylindrotheca
18SASV_1570	Eukaryota	Dinoflagellata	Dinophyceae	Gymnodiniphycidae	Gymnodinium_clade	Gymnodinium
18SASV_1571	Eukaryota	Dinoflagellata	Dinophyceae	Gymnodiniphycidae	Gymnodinium_clade	Gymnodinium
18SASV_1572	Eukaryota	Dinoflagellata	Dinophyceae	Gymnodiniphycidae	Gymnodiniphycidae_fa	Gyrodinium
18SASV_1573	Eukaryota	Dinoflagellata	Dinophyceae	Gymnodiniphycidae	Gymnodiniphycidae_fa	Gyrodinium
18SASV_1574	Eukaryota	Dinoflagellata	Dinophyceae	NA	NA	NA
18SASV_1575	Eukaryota	NA	NA	NA	NA	NA
18SASV_1576	Eukaryota	Ochrophyta	NA	NA	NA	NA
18SASV_1577	Eukaryota	Protalveolata	Syndiniales	Syndiniales_or	Syndiniales_fa	Amoebophrya
18SASV_1578	Eukaryota	Annelida	Polychaeta	NA	NA	NA
18SASV_1579	Eukaryota	Dinoflagellata	Dinophyceae	NA	NA	NA
18SASV_1580	Eukaryota	Dinoflagellata	Dinophyceae	NA	NA	NA
18SASV_1581	Eukaryota	Dinoflagellata	NA	NA	NA	NA
18SASV_1582	Eukaryota	Ochrophyta	Diatomea	Bacillariophytina	Bacillariophyceae	NA
18SASV_1583	Eukaryota	Ochrophyta	Diatomea	Bacillariophytina	Mediophyceae	Odontella
18SASV_1584	Eukaryota	Cercozoa	Thecofilosea	Cryomonadida	Rhizaspididae	Rhogostoma
18SASV_1585	Eukaryota	Prymnesiophyceae	Prymnesiales	Prymnesiales_or	Prymnesiales_fa	Prymnesium
18SASV_1586	Eukaryota	Ochrophyta	Diatomea	Bacillariophytina	Mediophyceae	NA
18SASV_1587	Eukaryota	Mollusca	Bivalvia	Arcoida	NA	NA
18SASV_1588	Eukaryota	Annelida	Polychaeta	Phyllodocida	NA	NA
18SASV_1589	Eukaryota	Ochrophyta	Diatomea	Bacillariophytina	Mediophyceae	NA
18SASV_1590	Eukaryota	Ochrophyta	Diatomea	Bacillariophytina	Bacillariophyceae	Pseudo-nitzschia
18SASV_1591	Eukaryota	Ochrophyta	Diatomea	Coscinodiscophytina	NA	NA
18SASV_1592	Eukaryota	Ochrophyta	Diatomea	Coscinodiscophytina	Fragilariales	Thalassionema
18SASV_1593	Eukaryota	Dinoflagellata	Dinophyceae	Gymnodiniphycidae	Gymnodiniphycidae_fa	Gyrodinium
18SASV_1594	Eukaryota	Ochrophyta	Diatomea	Bacillariophytina	Bacillariophyceae	Fragilariopsis
18SASV_1595	Eukaryota	Dinoflagellata	Dinophyceae	Gymnodiniphycidae	Gymnodinium_clade	Gymnodinium
18SASV_1596	Eukaryota	Ochrophyta	Diatomea	Bacillariophytina	Mediophyceae	NA
18SASV_1597	Eukaryota	Cercozoa	NA	NA	NA	NA
18SASV_1598	Eukaryota	Choanoflagellida	Acanthoecida	Stephanoecidae	NA	NA
18SASV_1599	Eukaryota	Ochrophyta	Diatomea	Bacillariophytina	Mediophyceae	NA
18SASV_1600	Eukaryota	Dinoflagellata	Dinophyceae	NA	NA	NA
18SASV_1601	Eukaryota	NA	NA	NA	NA	NA
18SASV_1602	Eukaryota	Ciliophora	Intramacronucleata	Conthreep	NA	NA
18SASV_1603	Eukaryota	NA	NA	NA	NA	NA
18SASV_1604	Eukaryota	NA	NA	NA	NA	NA
18SASV_1605	Eukaryota	Dinoflagellata	Incertae_Sedis	Incertae_Sedis_or	Incertae_Sedis_fa	Haplozoon
18SASV_1606	Eukaryota	NA	NA	NA	NA	NA
18SASV_1607	Eukaryota	Ochrophyta	Diatomea	Bacillariophytina	Mediophyceae	Thalassiosira
18SASV_1608	Eukaryota	Ochrophyta	Diatomea	Bacillariophytina	Mediophyceae	Odontella
18SASV_1609	Eukaryota	Chlorophyta_ph	Prasinophytae	NA	NA	NA
18SASV_1610	Eukaryota	Picozoa	Picomonadida	Picomonadidae	Picomonadidae_fa	Picomonas
18SASV_1611	Eukaryota	Dinoflagellata	Dinophyceae	NA	NA	NA
18SASV_1612	Eukaryota	Ochrophyta	Diatomea	Bacillariophytina	Bacillariophyceae	Navicula
18SASV_1613	Eukaryota	Ochrophyta	Diatomea	Bacillariophytina	Mediophyceae	Thalassiosira
18SASV_1614	Eukaryota	Ochrophyta	Diatomea	Bacillariophytina	Bacillariophyceae	Fragilariopsis
18SASV_1615	Eukaryota	Dinoflagellata	Dinophyceae	Gymnodiniphycidae	Gymnodinium_clade	Gymnodinium
18SASV_1616	Eukaryota	Ciliophora	Intramacronucleata	Spirotrichea	Choreotrichia	Rimostrombidium
18SASV_1617	Eukaryota	Ochrophyta	MOCH-2	NA	NA	NA
18SASV_1618	Eukaryota	Picozoa	Picomonadida	Picomonadidae	Picomonadidae_fa	Picomonas
18SASV_1619	Eukaryota	Ochrophyta	Diatomea	Bacillariophytina	Mediophyceae	Odontella
18SASV_1620	Eukaryota	Ochrophyta	Diatomea	Bacillariophytina	Mediophyceae	NA
18SASV_1621	Eukaryota	Dinoflagellata	Dinophyceae	Gymnodiniphycidae	NA	NA
18SASV_1622	Eukaryota	Ochrophyta	Diatomea	Bacillariophytina	Mediophyceae	NA
18SASV_1623	Eukaryota	Dinoflagellata	Dinophyceae	Gymnodiniphycidae	Gymnodinium_clade	NA
18SASV_1624	Eukaryota	Ciliophora	Intramacronucleata	Spirotrichea	Choreotrichia	NA
18SASV_1625	Eukaryota	Ochrophyta	Diatomea	Bacillariophytina	Bacillariophyceae	Navicula
18SASV_1626	Eukaryota	Incertae_Sedis_ph	Incertae_Sedis_cl	Incertae_Sedis_or	Incertae_Sedis_fa	Telonema
18SASV_1627	Eukaryota	Ochrophyta	Diatomea	Coscinodiscophytina	Fragilariales	NA
18SASV_1628	Eukaryota	Dinoflagellata	Dinophyceae	Peridiniphycidae	Thoracosphaeraceae	Scrippsiella
18SASV_1629	Eukaryota	Ochrophyta	NA	NA	NA	NA
18SASV_1630	Eukaryota	Cercozoa	Imbricatea	Marimonadida	Marimonadida_fa	Pseudopirsonia
18SASV_1631	Eukaryota	Cercozoa	Granofilosea	Granofilosea_or	Granofilosea_fa	Massisteria
18SASV_1632	Eukaryota	Protalveolata	Syndiniales	Syndiniales_or	Syndiniales_fa	Amoebophrya
18SASV_1633	Eukaryota	Labyrinthulomycetes	Labyrinthulomycetes_cl	Labyrinthulomycetes_or	Thraustochytriaceae	Thraustochytrium
18SASV_1634	Eukaryota	Ochrophyta	Diatomea	Bacillariophytina	Mediophyceae	Thalassiosira
18SASV_1635	Eukaryota	Chlorophyta_ph	Mamiellophyceae	Mamiellales	Mamiellales_fa	Micromonas
18SASV_1636	Eukaryota	Ochrophyta	Diatomea	Bacillariophytina	Bacillariophyceae	Navicula
18SASV_1637	Eukaryota	NA	NA	NA	NA	NA
18SASV_1638	Eukaryota	Cryptomonadales	Cryptomonadales_cl	Cryptomonadales_or	Cryptomonadales_fa	Geminigera
18SASV_1639	Eukaryota	Protalveolata	Syndiniales	Syndiniales_or	Syndiniales_Group_II	NA
18SASV_1640	Eukaryota	Dinoflagellata	Dinophyceae	NA	NA	NA
18SASV_1641	Eukaryota	Ochrophyta	Diatomea	Coscinodiscophytina	NA	NA
18SASV_1642	Eukaryota	Dinoflagellata	Dinophyceae	NA	NA	NA
18SASV_1643	Eukaryota	Dinoflagellata	NA	NA	NA	NA
18SASV_1644	Eukaryota	Dinoflagellata	Dinophyceae	NA	NA	NA
18SASV_1645	Eukaryota	Ochrophyta	Diatomea	Bacillariophytina	Mediophyceae	Thalassiosira
18SASV_1646	Eukaryota	Cercozoa	Thecofilosea	Cryomonadida	Rhizaspididae	Rhogostoma
18SASV_1647	Eukaryota	Ochrophyta	Diatomea	Bacillariophytina	Bacillariophyceae	Navicula
18SASV_1648	Eukaryota	Ochrophyta	Diatomea	Bacillariophytina	Mediophyceae	Thalassiosira
18SASV_1649	Eukaryota	NA	NA	NA	NA	NA
18SASV_1650	Eukaryota	Ochrophyta	Diatomea	Bacillariophytina	Mediophyceae	Thalassiosira
18SASV_1651	Eukaryota	Dinoflagellata	Dinophyceae	NA	NA	NA
18SASV_1652	Eukaryota	Protalveolata	Syndiniales	Syndiniales_or	Syndiniales_Group_II	NA
18SASV_1653	Eukaryota	Ochrophyta	Diatomea	Bacillariophytina	Mediophyceae	NA
18SASV_1654	Eukaryota	Picozoa	Picomonadida	Picomonadidae	Picomonadidae_fa	Picomonas
18SASV_1655	Eukaryota	Protalveolata	Syndiniales	Syndiniales_or	Syndiniales_fa	Amoebophrya
18SASV_1656	Eukaryota	Protalveolata	Syndiniales	Syndiniales_or	Syndiniales_Group_II	NA
18SASV_1657	Eukaryota	Protalveolata	Syndiniales	Syndiniales_or	Syndiniales_Group_II	NA
18SASV_1658	Eukaryota	Prymnesiophyceae	Prymnesiophyceae_cl	Prymnesiophyceae_or	Prymnesiophyceae_fa	Phaeocystis
18SASV_1659	Eukaryota	Ochrophyta	Diatomea	Bacillariophytina	Mediophyceae	NA
18SASV_1660	Eukaryota	Cercozoa	Thecofilosea	Cryomonadida	Rhizaspididae	Rhogostoma
18SASV_1661	Eukaryota	Dinoflagellata	Incertae_Sedis	Incertae_Sedis_or	Incertae_Sedis_fa	Haplozoon
18SASV_1662	Eukaryota	Dinoflagellata	Dinophyceae	Gymnodiniphycidae	NA	NA
18SASV_1663	Eukaryota	Dinoflagellata	Dinophyceae	Gymnodiniphycidae	Suessiaceae	NA
18SASV_1664	Eukaryota	Ochrophyta	Diatomea	Bacillariophytina	Bacillariophyceae	NA
18SASV_1665	Eukaryota	Cnidaria	Hydrozoa	Siphonophorae	NA	NA
18SASV_1666	Eukaryota	Dinoflagellata	Dinophyceae	Gymnodiniphycidae	NA	NA
18SASV_1667	Eukaryota	Protalveolata	Syndiniales	Syndiniales_or	Syndiniales_fa	Amoebophrya
18SASV_1668	Eukaryota	Dinoflagellata	Dinophyceae	Gymnodiniphycidae	NA	NA
18SASV_1669	Eukaryota	Picozoa	Picomonadida	Picomonadidae	Picomonadidae_fa	Picomonas
18SASV_1670	Eukaryota	Dinoflagellata	Dinophyceae	Gymnodiniphycidae	Gymnodinium_clade	NA
18SASV_1671	Eukaryota	Ochrophyta	Diatomea	Bacillariophytina	Mediophyceae	Chaetoceros
18SASV_1672	Eukaryota	Ctenophora	Tentaculata	Lobata	NA	NA
18SASV_1673	Eukaryota	Dinoflagellata	Dinophyceae	Gymnodiniphycidae	NA	NA
18SASV_1674	Eukaryota	Dinoflagellata	Dinophyceae	NA	NA	NA
18SASV_1675	Eukaryota	Dinoflagellata	Dinophyceae	Peridiniphycidae	Gonyaulacales	Heterodinium
18SASV_1676	Eukaryota	Dinoflagellata	Dinophyceae	NA	NA	NA
18SASV_1677	Eukaryota	Arthropoda	Malacostraca	NA	NA	NA
18SASV_1678	Eukaryota	Ochrophyta	Diatomea	Bacillariophytina	Bacillariophyceae	Fragilariopsis
18SASV_1679	Eukaryota	NA	NA	NA	NA	NA
18SASV_1680	Eukaryota	Ochrophyta	Diatomea	Coscinodiscophytina	Rhizosolenids	Guinardia
18SASV_1681	Eukaryota	Ochrophyta	NA	NA	NA	NA
18SASV_1682	Eukaryota	Dinoflagellata	NA	NA	NA	NA
18SASV_1683	Eukaryota	Dinoflagellata	Dinophyceae	NA	NA	NA
18SASV_1684	Eukaryota	Ochrophyta	Dictyochophyceae	Pedinellales	NA	NA
18SASV_1685	Eukaryota	Protalveolata	Syndiniales	Syndiniales_or	Syndiniales_Group_I	NA
18SASV_1686	Eukaryota	MAST-3	MAST-3L	NA	NA	NA
18SASV_1687	Eukaryota	Dinoflagellata	Dinophyceae	Gymnodiniphycidae	Gymnodiniphycidae_fa	Ptychodiscus
18SASV_1688	Eukaryota	NA	NA	NA	NA	NA
18SASV_1689	Eukaryota	Ochrophyta	Diatomea	Bacillariophytina	Mediophyceae	NA
18SASV_1690	Eukaryota	Protalveolata	Syndiniales	Syndiniales_or	Syndiniales_Group_II	NA
18SASV_1691	Eukaryota	Ochrophyta	Diatomea	Bacillariophytina	Mediophyceae	NA
18SASV_1692	Eukaryota	Dinoflagellata	Dinophyceae	NA	NA	NA
18SASV_1693	Eukaryota	Dinoflagellata	Dinophyceae	NA	NA	NA
18SASV_1694	Eukaryota	Ochrophyta	Chrysophyceae	Chromulinales	Chromulinales_fa	Spumella
18SASV_1695	Eukaryota	Protalveolata	Syndiniales	Syndiniales_or	Syndiniales_Group_II	NA
18SASV_1696	Eukaryota	Ochrophyta	Diatomea	Bacillariophytina	Mediophyceae	Chaetoceros
18SASV_1697	Eukaryota	Ochrophyta	Diatomea	Coscinodiscophytina	Fragilariales	Grammonema
18SASV_1698	Eukaryota	Dinoflagellata	Dinophyceae	Peridiniphycidae	NA	NA
18SASV_1699	Eukaryota	Labyrinthulomycetes	NA	NA	NA	NA
18SASV_1700	Eukaryota	Incertae_Sedis	NA	NA	NA	NA
18SASV_1701	Eukaryota	Protalveolata	Syndiniales	Syndiniales_or	Syndiniales_Group_II	NA
18SASV_1702	Eukaryota	Dinoflagellata	Dinophyceae	Peridiniphycidae	Gonyaulacales	Azadinium
18SASV_1703	Eukaryota	Dinoflagellata	Dinophyceae	Peridiniphycidae	Thoracosphaeraceae	Cryptoperidiniopsis
18SASV_1704	Eukaryota	NA	NA	NA	NA	NA
18SASV_1705	Eukaryota	Dinoflagellata	Dinophyceae	NA	NA	NA
18SASV_1706	Eukaryota	Incertae_Sedis	Incertae_Sedis_cl	Incertae_Sedis_or	Incertae_Sedis_fa	Pirsonia
18SASV_1707	Eukaryota	NA	NA	NA	NA	NA
18SASV_1708	Eukaryota	Dinoflagellata	Dinophyceae	Gymnodiniphycidae	NA	NA
18SASV_1709	Eukaryota	NA	NA	NA	NA	NA
18SASV_1710	Eukaryota	Protalveolata	Syndiniales	Syndiniales_or	Syndiniales_fa	Amoebophrya
18SASV_1711	Eukaryota	NA	NA	NA	NA	NA
18SASV_1712	Eukaryota	Ochrophyta	Diatomea	Bacillariophytina	Mediophyceae	Chaetoceros
18SASV_1713	Eukaryota	Dinoflagellata	Dinophyceae	NA	NA	NA
18SASV_1714	Eukaryota	Dinoflagellata	Dinophyceae	Peridiniphycidae	NA	NA
18SASV_1715	Eukaryota	Protalveolata	Syndiniales	Syndiniales_or	Syndiniales_Group_II	NA
18SASV_1716	Eukaryota	Ochrophyta	NA	NA	NA	NA
18SASV_1717	Eukaryota	NA	NA	NA	NA	NA
18SASV_1718	Eukaryota	NA	NA	NA	NA	NA
18SASV_1719	Eukaryota	NA	NA	NA	NA	NA
18SASV_1720	Eukaryota	Annelida	Polychaeta	Phyllodocida	NA	NA
18SASV_1721	Eukaryota	Ochrophyta	Diatomea	Bacillariophytina	Mediophyceae	Eucampia
18SASV_1722	Eukaryota	Protalveolata	Syndiniales	Syndiniales_or	Syndiniales_Group_II	NA
18SASV_1723	Eukaryota	Ochrophyta	MOCH-2	NA	NA	NA
18SASV_1724	Eukaryota	Ochrophyta	Diatomea	Coscinodiscophytina	Coscinodiscophytina_fa	Actinocyclus
18SASV_1725	Eukaryota	Cercozoa	NA	NA	NA	NA
18SASV_1726	Eukaryota	Dinoflagellata	Dinophyceae	Peridiniphycidae	NA	NA
18SASV_1727	Eukaryota	Dinoflagellata	Dinophyceae	NA	NA	NA
18SASV_1728	Eukaryota	Ochrophyta	Diatomea	Bacillariophytina	Mediophyceae	Minidiscus
18SASV_1729	Eukaryota	Dinoflagellata	Dinophyceae	Gymnodiniphycidae	NA	NA
18SASV_1730	Eukaryota	Ochrophyta	Diatomea	Bacillariophytina	Mediophyceae	NA
18SASV_1731	Eukaryota	Ochrophyta	NA	NA	NA	NA
18SASV_1732	Eukaryota	Dinoflagellata	Dinophyceae	Peridiniphycidae	NA	NA
18SASV_1733	Eukaryota	Ochrophyta	Diatomea	Bacillariophytina	Mediophyceae	NA
18SASV_1734	Eukaryota	Ochrophyta	Phaeophyceae	NA	NA	NA
18SASV_1735	Eukaryota	Ochrophyta	Diatomea	Bacillariophytina	Mediophyceae	NA
18SASV_1736	Eukaryota	Cercozoa	NA	NA	NA	NA
18SASV_1737	Eukaryota	Incertae_Sedis_ph	Incertae_Sedis_cl	Incertae_Sedis_or	Incertae_Sedis_fa	Telonema
18SASV_1738	Eukaryota	Dinoflagellata	NA	NA	NA	NA
18SASV_1739	Eukaryota	Incertae_Sedis_ph	Incertae_Sedis_cl	Incertae_Sedis_or	Incertae_Sedis_fa	Telonema
18SASV_1740	Eukaryota	Cryptomonadales	Cryptomonadales_cl	Cryptomonadales_or	Cryptomonadales_fa	Geminigera
18SASV_1741	Eukaryota	Ochrophyta	Diatomea	Bacillariophytina	Mediophyceae	Chaetoceros
18SASV_1742	Eukaryota	Ochrophyta	Pelagophyceae	Sarcinochrysidales	Sarcinochrysidales_fa	NA
18SASV_1743	Eukaryota	Ochrophyta	Diatomea	Coscinodiscophytina	Rhizosolenids	Proboscia
18SASV_1744	Eukaryota	Ochrophyta	Diatomea	Bacillariophytina	Mediophyceae	Arcocellulus
18SASV_1745	Eukaryota	Ochrophyta	Diatomea	Coscinodiscophytina	NA	NA
18SASV_1746	Eukaryota	Dinoflagellata	Dinophyceae	NA	NA	NA
18SASV_1747	Eukaryota	Protalveolata	Syndiniales	Syndiniales_or	Syndiniales_fa	Amoebophrya
18SASV_1748	Eukaryota	Ochrophyta	Diatomea	Bacillariophytina	Mediophyceae	Chaetoceros
18SASV_1749	Eukaryota	Dinoflagellata	Dinophyceae	Gymnodiniphycidae	Gymnodiniphycidae_fa	Gyrodinium
18SASV_1750	Eukaryota	Ochrophyta	Diatomea	Bacillariophytina	Bacillariophyceae	Fragilariopsis
18SASV_1751	Eukaryota	Dinoflagellata	Dinophyceae	Gymnodiniphycidae	NA	NA
18SASV_1752	Eukaryota	Ochrophyta	Diatomea	Coscinodiscophytina	Rhizosolenids	Proboscia
18SASV_1753	Eukaryota	Dinoflagellata	Dinophyceae	NA	NA	NA
18SASV_1754	Eukaryota	Dinoflagellata	Dinophyceae	Peridiniphycidae	NA	NA
18SASV_1755	Eukaryota	Ochrophyta	Diatomea	Bacillariophytina	Bacillariophyceae	Navicula
18SASV_1756	Eukaryota	Ciliophora	Intramacronucleata	Conthreep	Prostomatea	Cryptocaryon
18SASV_1757	Eukaryota	Ochrophyta	Diatomea	Coscinodiscophytina	Corethrids	Corethron
18SASV_1758	Eukaryota	Cercozoa	NA	NA	NA	NA
18SASV_1759	Eukaryota	Dinoflagellata	Dinophyceae	NA	NA	NA
18SASV_1760	Eukaryota	Dinoflagellata	Incertae_Sedis	Incertae_Sedis_or	Incertae_Sedis_fa	Haplozoon
18SASV_1761	Eukaryota	Dinoflagellata	Dinophyceae	NA	NA	NA
18SASV_1762	Eukaryota	Dinoflagellata	Dinophyceae	Gymnodiniphycidae	NA	NA
18SASV_1763	Eukaryota	Ochrophyta	Diatomea	Bacillariophytina	Bacillariophyceae	Pseudo-nitzschia
18SASV_1764	Eukaryota	Chlorophyta_ph	Prasinophytae	NA	NA	NA
18SASV_1765	Eukaryota	Cryptomonadales	Cryptomonadales_cl	Cryptomonadales_or	Cryptomonadales_fa	Geminigera
18SASV_1766	Eukaryota	NA	NA	NA	NA	NA
18SASV_1767	Eukaryota	NA	NA	NA	NA	NA
18SASV_1768	Eukaryota	Chytridiomycota	Incertae_Sedis	Rhizophydiales	NA	NA
18SASV_1769	Eukaryota	Ciliophora	Intramacronucleata	Conthreep	Phyllopharyngea	Dysteria
18SASV_1770	Eukaryota	Ochrophyta	Diatomea	Bacillariophytina	Bacillariophyceae	Achnanthidium
18SASV_1771	Eukaryota	NA	NA	NA	NA	NA
18SASV_1772	Eukaryota	Cercozoa	Thecofilosea	Cryomonadida	Rhizaspididae	Rhogostoma
18SASV_1773	Eukaryota	Cercozoa	Thecofilosea	Cryomonadida	Rhizaspididae	Rhogostoma
18SASV_1774	Eukaryota	Ochrophyta	Diatomea	Coscinodiscophytina	Fragilariales	Thalassionema
18SASV_1775	Eukaryota	Dinoflagellata	Dinophyceae	Gymnodiniphycidae	Gymnodiniphycidae_fa	Gyrodinium
18SASV_1776	Eukaryota	Cercozoa	Thecofilosea	Cryomonadida	Rhizaspididae	Rhogostoma
18SASV_1777	Eukaryota	Protalveolata	Syndiniales	Syndiniales_or	Syndiniales_Group_III	NA
18SASV_1778	Eukaryota	Dinoflagellata	Dinophyceae	NA	NA	NA
18SASV_1779	Eukaryota	Dinoflagellata	Dinophyceae	NA	NA	NA
18SASV_1780	Eukaryota	NA	NA	NA	NA	NA
18SASV_1781	Eukaryota	Ochrophyta	Diatomea	Bacillariophytina	Mediophyceae	Chaetoceros
18SASV_1782	Eukaryota	Dinoflagellata	Dinophyceae	Peridiniphycidae	NA	NA
18SASV_1783	Eukaryota	Ochrophyta	Diatomea	Bacillariophytina	Mediophyceae	NA
18SASV_1784	Eukaryota	Ochrophyta	Diatomea	Bacillariophytina	Mediophyceae	Odontella
18SASV_1785	Eukaryota	Ochrophyta	Diatomea	Bacillariophytina	Mediophyceae	Odontella
18SASV_1786	Eukaryota	Cercozoa	Thecofilosea	Cryomonadida	Rhizaspididae	Rhogostoma
18SASV_1787	Eukaryota	Ochrophyta	Diatomea	Bacillariophytina	Mediophyceae	Odontella
18SASV_1788	Eukaryota	Dinoflagellata	Dinophyceae	Gymnodiniphycidae	Gymnodinium_clade	NA
18SASV_1789	Eukaryota	Ochrophyta	Diatomea	Coscinodiscophytina	Fragilariales	Thalassionema
18SASV_1790	Eukaryota	Ochrophyta	Diatomea	Bacillariophytina	Mediophyceae	NA
18SASV_1791	Eukaryota	Ochrophyta	Diatomea	Bacillariophytina	Bacillariophyceae	NA
18SASV_1792	Eukaryota	NA	NA	NA	NA	NA
18SASV_1793	Eukaryota	Protalveolata	Syndiniales	Syndiniales_or	Syndiniales_fa	Amoebophrya
18SASV_1794	Eukaryota	Ochrophyta	Diatomea	Bacillariophytina	Bacillariophyceae	Nitzschia
18SASV_1795	Eukaryota	Ochrophyta	Diatomea	Bacillariophytina	Mediophyceae	NA
18SASV_1796	Eukaryota	Dinoflagellata	Dinophyceae	Gymnodiniphycidae	NA	NA
18SASV_1797	Eukaryota	Incertae_Sedis_ph	Incertae_Sedis_cl	Incertae_Sedis_or	Incertae_Sedis_fa	Telonema
18SASV_1798	Eukaryota	Ochrophyta	NA	NA	NA	NA
18SASV_1799	Eukaryota	Ochrophyta	Diatomea	Bacillariophytina	NA	NA
18SASV_1800	Eukaryota	Protalveolata	Syndiniales	Syndiniales_or	Syndiniales_Group_II	NA
18SASV_1801	Eukaryota	Dinoflagellata	Dinophyceae	Peridiniphycidae	NA	NA
18SASV_1802	Eukaryota	Cercozoa	NA	NA	NA	NA
18SASV_1803	Eukaryota	Incertae_Sedis_ph	Incertae_Sedis_cl	Incertae_Sedis_or	Incertae_Sedis_fa	Telonema
18SASV_1804	Eukaryota	Cryptomonadales	Cryptomonadales_cl	Cryptomonadales_or	Cryptomonadales_fa	Geminigera
18SASV_1805	Eukaryota	Chytridiomycota	Incertae_Sedis	Rhizophydiales	NA	NA
18SASV_1806	Eukaryota	Ochrophyta	Diatomea	Coscinodiscophytina	Corethrids	Corethron
18SASV_1807	Eukaryota	Ochrophyta	Diatomea	Coscinodiscophytina	Coscinodiscophytina_fa	Actinocyclus
18SASV_1808	Eukaryota	Ochrophyta	Diatomea	Coscinodiscophytina	Corethrids	Corethron
18SASV_1809	Eukaryota	Ochrophyta	Diatomea	Bacillariophytina	Mediophyceae	Chaetoceros
18SASV_1810	Eukaryota	Dinoflagellata	Dinophyceae	NA	NA	NA
18SASV_1811	Eukaryota	Ochrophyta	Diatomea	Bacillariophytina	Mediophyceae	Chaetoceros
18SASV_1812	Eukaryota	Dinoflagellata	Dinophyceae	Gymnodiniphycidae	NA	NA
18SASV_1813	Eukaryota	Dinoflagellata	Dinophyceae	Dinophysiales	Dinophysiales_fa	Dinophysis
18SASV_1814	Eukaryota	Dinoflagellata	Dinophyceae	NA	NA	NA
18SASV_1815	Eukaryota	Ochrophyta	Diatomea	Coscinodiscophytina	Corethrids	Corethron
18SASV_1816	Eukaryota	Ochrophyta	Diatomea	Coscinodiscophytina	NA	NA
18SASV_1817	Eukaryota	Ochrophyta	Diatomea	Coscinodiscophytina	NA	NA
18SASV_1818	Eukaryota	Ochrophyta	Diatomea	Bacillariophytina	Mediophyceae	Eucampia
18SASV_1819	Eukaryota	Ochrophyta	Diatomea	Coscinodiscophytina	NA	NA
18SASV_1820	Eukaryota	Ochrophyta	Diatomea	Bacillariophytina	Mediophyceae	Chaetoceros
18SASV_1821	Eukaryota	Cercozoa	NA	NA	NA	NA
18SASV_1822	Eukaryota	Ciliophora	Intramacronucleata	Spirotrichea	Oligotrichia	NA
18SASV_1823	Eukaryota	Ochrophyta	Diatomea	Bacillariophytina	Mediophyceae	NA
18SASV_1824	Eukaryota	Dinoflagellata	Dinophyceae	NA	NA	NA
18SASV_1825	Eukaryota	Ochrophyta	Ochrophyta_cl	Ochrophyta_or	Ochrophyta_fa	Bolidomonas
18SASV_1826	Eukaryota	Dinoflagellata	Dinophyceae	NA	NA	NA
18SASV_1827	Eukaryota	NA	NA	NA	NA	NA
18SASV_1828	Eukaryota	Protalveolata	Syndiniales	Syndiniales_or	Syndiniales_fa	Amoebophrya
18SASV_1829	Eukaryota	Ochrophyta	Diatomea	Bacillariophytina	Mediophyceae	Chaetoceros
18SASV_1830	Eukaryota	Dinoflagellata	Dinophyceae	Gymnodiniphycidae	Gymnodiniphycidae_fa	Gyrodinium
18SASV_1831	Eukaryota	Dinoflagellata	Dinophyceae	Gymnodiniphycidae	NA	NA
18SASV_1832	Eukaryota	Protalveolata	Syndiniales	Syndiniales_or	Syndiniales_fa	Amoebophrya
18SASV_1833	Eukaryota	Ochrophyta	Diatomea	Bacillariophytina	Mediophyceae	Chaetoceros
18SASV_1834	Eukaryota	Protalveolata	Syndiniales	Syndiniales_or	Syndiniales_Group_II	NA
18SASV_1835	Eukaryota	Dinoflagellata	Dinophyceae	Gymnodiniphycidae	Gymnodiniphycidae_fa	Gyrodinium
18SASV_1836	Eukaryota	Dinoflagellata	Dinophyceae	NA	NA	NA
18SASV_1837	Eukaryota	Dinoflagellata	NA	NA	NA	NA
18SASV_1838	Eukaryota	Cercozoa	Thecofilosea	Cryomonadida	Rhizaspididae	Rhogostoma
18SASV_1839	Eukaryota	Dinoflagellata	Dinophyceae	NA	NA	NA
18SASV_1840	Eukaryota	Picozoa	Picomonadida	Picomonadidae	Picomonadidae_fa	Picomonas
18SASV_1841	Eukaryota	Protalveolata	Syndiniales	Syndiniales_or	Syndiniales_fa	Amoebophrya
18SASV_1842	Eukaryota	Cryptomonadales	NA	NA	NA	NA
18SASV_1843	Eukaryota	Dinoflagellata	Dinophyceae	Gymnodiniphycidae	Gymnodiniphycidae_fa	Gyrodinium
18SASV_1844	Eukaryota	Ochrophyta	Diatomea	Coscinodiscophytina	Fragilariales	Thalassionema
18SASV_1845	Eukaryota	Protalveolata	Syndiniales	Syndiniales_or	Syndiniales_Group_II	NA
18SASV_1846	Eukaryota	Dinoflagellata	Dinophyceae	Peridiniphycidae	NA	NA
18SASV_1847	Eukaryota	Dinoflagellata	Dinophyceae	Gymnodiniphycidae	Gymnodiniphycidae_fa	Gyrodinium
18SASV_1848	Eukaryota	Dinoflagellata	Dinophyceae	Gymnodiniphycidae	NA	NA
18SASV_1849	Eukaryota	Chlorophyta_ph	Mamiellophyceae	Mamiellophyceae_or	Mamiellophyceae_fa	Dolichomastix
18SASV_1850	Eukaryota	Dinoflagellata	Dinophyceae	NA	NA	NA
18SASV_1851	Eukaryota	NA	NA	NA	NA	NA
18SASV_1852	Eukaryota	Dinoflagellata	Dinophyceae	NA	NA	NA
18SASV_1853	Eukaryota	Dinoflagellata	Dinophyceae	Gymnodiniphycidae	Gymnodinium_clade	Gymnodinium
18SASV_1854	Eukaryota	Cryptomonadales	Cryptomonadales_cl	Cryptomonadales_or	Cryptomonadales_fa	Geminigera
18SASV_1855	Eukaryota	Dinoflagellata	Dinophyceae	Gymnodiniphycidae	NA	NA
18SASV_1856	Eukaryota	Dinoflagellata	Dinophyceae	Gymnodiniphycidae	Gymnodinium_clade	Gymnodinium
18SASV_1857	Eukaryota	Protalveolata	Syndiniales	Syndiniales_or	Syndiniales_Group_II	NA
18SASV_1858	Eukaryota	Dinoflagellata	Dinophyceae	NA	NA	NA
18SASV_1859	Eukaryota	Ochrophyta	Diatomea	Bacillariophytina	Mediophyceae	NA
18SASV_1860	Eukaryota	Prymnesiophyceae	Prymnesiales	Prymnesiales_or	Prymnesiales_fa	NA
18SASV_1861	Eukaryota	Dinoflagellata	NA	NA	NA	NA
18SASV_1862	Eukaryota	Cryptomonadales	Cryptomonadales_cl	Cryptomonadales_or	Cryptomonadales_fa	NA
18SASV_1863	Eukaryota	NA	NA	NA	NA	NA
18SASV_1864	Eukaryota	Ochrophyta	Ochrophyta_cl	Ochrophyta_or	Ochrophyta_fa	Bolidomonas
18SASV_1865	Eukaryota	Dinoflagellata	Dinophyceae	NA	NA	NA
18SASV_1866	Eukaryota	Dinoflagellata	Dinophyceae	NA	NA	NA
18SASV_1867	Eukaryota	Chlorophyta_ph	Mamiellophyceae	Mamiellales	Mamiellales_fa	Mamiella
18SASV_1868	Eukaryota	Dinoflagellata	Dinophyceae	NA	NA	NA
18SASV_1869	Eukaryota	Protalveolata	Syndiniales	Syndiniales_or	Syndiniales_Group_II	NA
18SASV_1870	Eukaryota	Ochrophyta	Ochrophyta_cl	Ochrophyta_or	Ochrophyta_fa	Bolidomonas
18SASV_1871	Eukaryota	Ochrophyta	Diatomea	Bacillariophytina	Mediophyceae	NA
18SASV_1872	Eukaryota	NA	NA	NA	NA	NA
18SASV_1873	Eukaryota	NA	NA	NA	NA	NA
18SASV_1874	Eukaryota	Protalveolata	Syndiniales	Syndiniales_or	Syndiniales_Group_II	NA
18SASV_1875	Eukaryota	Protalveolata	Syndiniales	Syndiniales_or	Syndiniales_Group_II	NA
18SASV_1876	Eukaryota	NA	NA	NA	NA	NA
18SASV_1877	Eukaryota	Cercozoa	NA	NA	NA	NA
18SASV_1878	Eukaryota	Arthropoda	Maxillopoda	Cyclopoida	NA	NA
18SASV_1879	Eukaryota	MAST-4	MAST-4D	NA	NA	NA
18SASV_1880	Eukaryota	Dinoflagellata	Dinophyceae	Peridiniphycidae	NA	NA
18SASV_1881	Eukaryota	Dinoflagellata	Dinophyceae	NA	NA	NA
18SASV_1882	Eukaryota	Dinoflagellata	Dinophyceae	Peridiniphycidae	NA	NA
18SASV_1883	Eukaryota	Tunicata	Thaliacea	Salpida	NA	NA
18SASV_1884	Eukaryota	NA	NA	NA	NA	NA
18SASV_1885	Eukaryota	Dinoflagellata	Dinophyceae	Peridiniphycidae	NA	NA
18SASV_1886	Eukaryota	NA	NA	NA	NA	NA
18SASV_1887	Eukaryota	Dinoflagellata	Dinophyceae	Gymnodiniphycidae	NA	NA
18SASV_1888	Eukaryota	Chlorophyta_ph	Mamiellophyceae	NA	NA	NA
18SASV_1889	Eukaryota	NA	NA	NA	NA	NA
18SASV_1890	Eukaryota	Cercozoa	NA	NA	NA	NA
18SASV_1891	Eukaryota	Cercozoa	Granofilosea	Granofilosea_or	Granofilosea_fa	Massisteria
18SASV_1892	Eukaryota	Dinoflagellata	Dinophyceae	Gymnodiniphycidae	NA	NA
18SASV_1893	Eukaryota	Ochrophyta	NA	NA	NA	NA
18SASV_1894	Eukaryota	Dinoflagellata	Dinophyceae	Gymnodiniphycidae	Gymnodiniphycidae_fa	Gyrodinium
18SASV_1895	Eukaryota	Cercozoa	NA	NA	NA	NA
18SASV_1896	Eukaryota	Ochrophyta	Diatomea	Bacillariophytina	Bacillariophyceae	Entomoneis
18SASV_1897	Eukaryota	NA	NA	NA	NA	NA
18SASV_1898	Eukaryota	Cercozoa	NA	NA	NA	NA
18SASV_1899	Eukaryota	Incertae_Sedis	Incertae_Sedis_cl	Incertae_Sedis_or	Incertae_Sedis_fa	Pirsonia
18SASV_1900	Eukaryota	NA	NA	NA	NA	NA
18SASV_1901	Eukaryota	NA	NA	NA	NA	NA
18SASV_1902	Eukaryota	Cercozoa	Granofilosea	Granofilosea_or	Granofilosea_fa	Massisteria
18SASV_1903	Eukaryota	Ochrophyta	Diatomea	Bacillariophytina	Mediophyceae	Chaetoceros
18SASV_1904	Eukaryota	Dinoflagellata	Dinophyceae	Gymnodiniphycidae	Gymnodinium_clade	NA
18SASV_1905	Eukaryota	Chlorophyta_ph	Mamiellophyceae	Mamiellales	Mamiellales_fa	Micromonas
18SASV_1906	Eukaryota	Ciliophora	Intramacronucleata	Conthreep	Oligohymenophorea	NA
18SASV_1907	Eukaryota	Ochrophyta	Diatomea	Bacillariophytina	Bacillariophyceae	Fragilariopsis
18SASV_1908	Eukaryota	Dinoflagellata	Dinophyceae	NA	NA	NA
18SASV_1909	Eukaryota	Ochrophyta	Diatomea	Bacillariophytina	Mediophyceae	Thalassiosira
18SASV_1910	Eukaryota	Dinoflagellata	Dinophyceae	NA	NA	NA
18SASV_1911	Eukaryota	Dinoflagellata	Dinophyceae	NA	NA	NA
18SASV_1912	Eukaryota	Dinoflagellata	Dinophyceae	Gymnodiniphycidae	Gymnodinium_clade	Gyrodiniellum
18SASV_1913	Eukaryota	Arthropoda	Maxillopoda	Calanoida	NA	NA
18SASV_1914	Eukaryota	Protalveolata	Syndiniales	NA	NA	NA
18SASV_1915	Eukaryota	Protalveolata	Syndiniales	Syndiniales_or	Syndiniales_Group_I	NA
18SASV_1916	Eukaryota	Ochrophyta	Chrysophyceae	NA	NA	NA
18SASV_1917	Eukaryota	Ochrophyta	Diatomea	Bacillariophytina	Bacillariophyceae	NA
18SASV_1918	Eukaryota	Incertae_Sedis_ph	Incertae_Sedis_cl	Incertae_Sedis_or	Incertae_Sedis_fa	Telonema
18SASV_1919	Eukaryota	Ochrophyta	Diatomea	Bacillariophytina	NA	NA
18SASV_1920	Eukaryota	Kathablepharidae	Kathablepharidae_cl	Kathablepharidae_or	Kathablepharidae_fa	Leucocryptos
18SASV_1921	Eukaryota	Dinoflagellata	Dinophyceae	NA	NA	NA
18SASV_1922	Eukaryota	Dinoflagellata	Dinophyceae	NA	NA	NA
18SASV_1923	Eukaryota	Dinoflagellata	Dinophyceae	Gymnodiniphycidae	Gymnodinium_clade	Gyrodiniellum
18SASV_1924	Eukaryota	MAST-3	MAST-3E	NA	NA	NA
18SASV_1925	Eukaryota	Dinoflagellata	Dinophyceae	NA	NA	NA
18SASV_1926	Eukaryota	NA	NA	NA	NA	NA
18SASV_1927	Eukaryota	Dinoflagellata	Dinophyceae	Peridiniphycidae	NA	NA
18SASV_1928	Eukaryota	Chlorophyta_ph	Prasinophytae	NA	NA	NA
18SASV_1929	Eukaryota	Dinoflagellata	Dinophyceae	NA	NA	NA
18SASV_1930	Eukaryota	Protalveolata	Syndiniales	Syndiniales_or	Syndiniales_Group_II	NA
18SASV_1931	Eukaryota	Dinoflagellata	Dinophyceae	Peridiniphycidae	Gonyaulacales	Azadinium
18SASV_1932	Eukaryota	Ochrophyta	Diatomea	Bacillariophytina	Mediophyceae	NA
18SASV_1933	Eukaryota	Ochrophyta	Dictyochophyceae	Florenciellales	Florenciellales_fa	Pseudochattonella
18SASV_1934	Eukaryota	Ochrophyta	Diatomea	Bacillariophytina	Mediophyceae	Odontella
18SASV_1935	Eukaryota	Ochrophyta	Diatomea	Bacillariophytina	Mediophyceae	Lithodesmium
18SASV_1936	Eukaryota	Ochrophyta	Diatomea	Bacillariophytina	Mediophyceae	Odontella
18SASV_1937	Eukaryota	Ciliophora	Intramacronucleata	Conthreep	NA	NA
18SASV_1938	Eukaryota	Dinoflagellata	Dinophyceae	NA	NA	NA
18SASV_1939	Eukaryota	Dinoflagellata	Dinophyceae	Gymnodiniphycidae	Gymnodinium_clade	NA
18SASV_1940	Eukaryota	Dinoflagellata	Dinophyceae	Gymnodiniphycidae	Suessiaceae	NA
18SASV_1941	Eukaryota	MAST-2	NA	NA	NA	NA
18SASV_1942	Eukaryota	Ochrophyta	Diatomea	Bacillariophytina	Mediophyceae	NA
18SASV_1943	Eukaryota	Ochrophyta	Diatomea	Bacillariophytina	NA	NA
18SASV_1944	Eukaryota	Ochrophyta	Diatomea	Bacillariophytina	Mediophyceae	NA
18SASV_1945	Eukaryota	Ochrophyta	Diatomea	Bacillariophytina	Bacillariophyceae	Pleurosigma
18SASV_1946	Eukaryota	Cryptomonadales	Cryptomonadales_cl	Cryptomonadales_or	Cryptomonadales_fa	Geminigera
18SASV_1947	Eukaryota	Dinoflagellata	Dinophyceae	Gymnodiniphycidae	Gymnodiniphycidae_fa	Gyrodinium
18SASV_1948	Eukaryota	Dinoflagellata	Dinophyceae	NA	NA	NA
18SASV_1949	Eukaryota	Protalveolata	Syndiniales	Syndiniales_or	Syndiniales_Group_III	NA
18SASV_1950	Eukaryota	NA	NA	NA	NA	NA
18SASV_1951	Eukaryota	Dinoflagellata	Dinophyceae	Peridiniphycidae	Peridiniales	NA
18SASV_1952	Eukaryota	Dinoflagellata	Dinophyceae	Gymnodiniphycidae	Gymnodinium_clade	NA
18SASV_1953	Eukaryota	Dinoflagellata	Dinophyceae	Peridiniphycidae	Gonyaulacales	NA
18SASV_1954	Eukaryota	Ochrophyta	Diatomea	Bacillariophytina	Mediophyceae	NA
18SASV_1955	Eukaryota	Protalveolata	Syndiniales	Syndiniales_or	Syndiniales_fa	Amoebophrya
18SASV_1956	Eukaryota	Protalveolata	Syndiniales	Syndiniales_or	Syndiniales_Group_II	NA
18SASV_1957	Eukaryota	Protalveolata	Syndiniales	Syndiniales_or	Syndiniales_fa	Amoebophrya
18SASV_1958	Eukaryota	Dinoflagellata	Dinophyceae	Gymnodiniphycidae	NA	NA
18SASV_1959	Eukaryota	Dinoflagellata	Dinophyceae	NA	NA	NA
18SASV_1960	Eukaryota	Protalveolata	Syndiniales	Syndiniales_or	Syndiniales_fa	Amoebophrya
18SASV_1961	Eukaryota	Ochrophyta	Dictyochophyceae	NA	NA	NA
18SASV_1962	Eukaryota	Ochrophyta	Diatomea	Coscinodiscophytina	Corethrids	Corethron
18SASV_1963	Eukaryota	Incertae_Sedis_ph	Incertae_Sedis_cl	Incertae_Sedis_or	Incertae_Sedis_fa	Telonema
18SASV_1964	Eukaryota	Chlorophyta_ph	Mamiellophyceae	NA	NA	NA
18SASV_1965	Eukaryota	Dinoflagellata	Dinophyceae	NA	NA	NA
18SASV_1966	Eukaryota	Ochrophyta	Diatomea	Coscinodiscophytina	Corethrids	Corethron
18SASV_1967	Eukaryota	NA	NA	NA	NA	NA
18SASV_1968	Eukaryota	Ochrophyta	Diatomea	Bacillariophytina	Mediophyceae	NA
18SASV_1969	Eukaryota	Ochrophyta	Diatomea	Bacillariophytina	Mediophyceae	Skeletonema
18SASV_1970	Eukaryota	Protalveolata	Syndiniales	Syndiniales_or	Syndiniales_Group_II	NA
18SASV_1971	Eukaryota	NA	NA	NA	NA	NA
18SASV_1972	Eukaryota	Ciliophora	Intramacronucleata	Spirotrichea	Oligotrichia	NA
18SASV_1973	Eukaryota	Labyrinthulomycetes	NA	NA	NA	NA
18SASV_1974	Eukaryota	Ochrophyta	Diatomea	Coscinodiscophytina	Rhizosolenids	Proboscia
18SASV_1975	Eukaryota	Dinoflagellata	Dinophyceae	Gymnodiniphycidae	Gymnodiniphycidae_fa	Gyrodinium
18SASV_1976	Eukaryota	Ochrophyta	Diatomea	Bacillariophytina	Mediophyceae	Chaetoceros
18SASV_1977	Eukaryota	Ochrophyta	Diatomea	Bacillariophytina	Bacillariophyceae	Pinnularia
18SASV_1978	Eukaryota	Dinoflagellata	Dinophyceae	NA	NA	NA
18SASV_1979	Eukaryota	Ciliophora	Intramacronucleata	Spirotrichea	Choreotrichia	NA
18SASV_1980	Eukaryota	Ochrophyta	Diatomea	Bacillariophytina	Bacillariophyceae	Nitzschia
18SASV_1981	Eukaryota	Chlorophyta_ph	Prasinophytae	NA	NA	NA
18SASV_1982	Eukaryota	Dinoflagellata	Dinophyceae	NA	NA	NA
18SASV_1983	Eukaryota	Ochrophyta	Diatomea	Bacillariophytina	Mediophyceae	NA
18SASV_1984	Eukaryota	Dinoflagellata	Dinophyceae	Gymnodiniphycidae	NA	NA
18SASV_1985	Eukaryota	Ochrophyta	Diatomea	Bacillariophytina	Mediophyceae	Chaetoceros
18SASV_1986	Eukaryota	Ochrophyta	Diatomea	Coscinodiscophytina	Fragilariales	NA
18SASV_1987	Eukaryota	Dinoflagellata	NA	NA	NA	NA
18SASV_1988	Eukaryota	Chlorophyta_ph	Prasinophytae	NA	NA	NA
18SASV_1989	Eukaryota	Ochrophyta	Diatomea	Coscinodiscophytina	Coscinodiscophytina_fa	Actinocyclus
18SASV_1990	Eukaryota	Incertae_Sedis_ph	Incertae_Sedis_cl	Incertae_Sedis_or	Incertae_Sedis_fa	Telonema
18SASV_1991	Eukaryota	Prymnesiophyceae	Prymnesiophyceae_cl	Prymnesiophyceae_or	Prymnesiophyceae_fa	Phaeocystis
18SASV_1992	Eukaryota	Ochrophyta	Diatomea	Coscinodiscophytina	Corethrids	Corethron
18SASV_1993	Eukaryota	Ochrophyta	Dictyochophyceae	Pedinellales	NA	NA
18SASV_1994	Eukaryota	Protalveolata	Syndiniales	Syndiniales_or	Syndiniales_Group_II	NA
18SASV_1995	Eukaryota	Dinoflagellata	Dinophyceae	Gymnodiniphycidae	NA	NA
18SASV_1996	Eukaryota	Incertae_Sedis_ph	Incertae_Sedis_cl	Incertae_Sedis_or	Incertae_Sedis_fa	Telonema
18SASV_1997	Eukaryota	Ciliophora	Intramacronucleata	Spirotrichea	Choreotrichia	NA
18SASV_1998	Eukaryota	Cryptomonadales	Cryptomonadales_cl	Cryptomonadales_or	Cryptomonadales_fa	NA
18SASV_1999	Eukaryota	Cryptophyceae_ph	Cryptophyceae_cl	Cryptophyceae_or	Cryptophyceae_fa	Goniomonas
[truncated: 481 more rows]
